# Supplementary material for: Glycoengineered keratinocyte library reveals essential functions of specific glycans for all stages of HSV-1 infection
Source: PubMed Central journal article supplement (PMC10622544; doi:10.1038/s41467-023-42669-6), 2023-11-02

## **Glycoengineered keratinocyte library reveals essential functions of specific glycans for all stages of HSV-1 infection**

Ieva Bagdonaite<sup>1\*</sup>, Irina N Marinova<sup>1</sup>, Asha M Rudjord-Levann<sup>1</sup>, Emil MH Pallesen<sup>1</sup>, Sarah King-Smith<sup>1</sup>, Richard Karlsson<sup>1</sup>, Troels B Rømer<sup>1</sup>, Yen-Hsi Chen<sup>1</sup>, Rebecca L Miller<sup>1</sup>, Sigvard Olofsson<sup>2</sup>, Rickard Nordén<sup>2</sup>, Tomas Bergström<sup>2</sup>, Sally Dabelsteen<sup>3</sup> and Hans H Wandall<sup>1\*</sup>

<sup>1</sup> Copenhagen Center for Glycomics, Institute of Cellular and Molecular Medicine, University of Copenhagen, DK-2200 Copenhagen, Denmark

<sup>2</sup> Department of Infectious Diseases, Institute of Biomedicine, University of Gothenburg, SE-41346 Gothenburg, Sweden

<sup>3</sup> School of Dentistry, University of Copenhagen, DK-2200 Copenhagen, Denmark

### **Supplementary Information**

**Supplementary Table 1.** Knock out indel sequencing and sgRNA/ZFN targeting sequences

**Supplementary Table 2.** CS disaccharide quantification in HaCaT WT

**Supplementary Table 3.** HS disaccharide quantification in HaCaT WT

**Supplementary Table 4.** Mutagenic primers

**Supplementary Table 5.** Oligonucleotide sequences for annealing and cloning the DNA template for gRNA into the LentiCRISPR-V2 plasmid

**Supplementary Figure 1.** N-glycoprofiling

**Supplementary Figure 2.** CORA O-glycoprofiling

**Supplementary Figure 3.** Flow cytometry supporting data

**Supplementary Figure 4.** Disaccharide analysis of HaCaT WT and *B4GALT7* KO cells

**Supplementary Figure 5.** Sequencing of DNA constructs

**Supplementary Figure 6.** Section panels of HSV-1-infected glycoengineered organotypic skin

**Supplementary Table 1.** Knock out indel sequencing and sgRNA/ZFN targeting sequences

| Gene                      | Clone                     | Sequence <sup>1</sup>                                       | gRNA/ZFN (5'-3')        | Indel | First affected a.a. |
|---------------------------|---------------------------|-------------------------------------------------------------|-------------------------|-------|---------------------|
| <u>N-Glycan</u>           |                           |                                                             |                         |       |                     |
| MGAT1 KO                  | REF                       | GATtcgcctggcccaagacgccc <u>AGG</u>                          | TCGCCTGGCCCAAGACGCCG    |       |                     |
|                           | 1E7_A1                    | GATtcgcctggcccaag----cgCGG                                  |                         | -4    | 60                  |
|                           | 1E7_A2                    | GATtcgcctggcccaagacg-cgAGG                                  |                         | -1    | 61                  |
| MGAT4A KO                 | REF                       | aatgagatgaggctccgcaa <u>TGGAAC</u>                          | AATGAGATGAGGCTCCGCAA    |       |                     |
|                           | 3C10_A1                   | aatgagatgaggctcc--aaTGGAAC                                  |                         | -2    | 4                   |
|                           | 3C10_A2                   | aatgagatgaggctccgca-TGGAAC                                  |                         | -1    | 5                   |
| MGAT4B KO                 | REF                       | TTG...GCAGgagagcctcaagc-gctcca <u>AGGAGCTCAACCTGGTGCTGG</u> | GGAGAGCCTCAAGCGCTCCA    |       |                     |
|                           | 3F8_A1                    | TTG...GCAGgagagcctcaagcTgctccaAGGAGCTCAACCTGGTGCTGG         |                         | +1    | 60                  |
|                           | 3F8_A2                    | TTG...-----TGG                                              |                         | -96   | 36                  |
| MGAT5+4B KO               | 2B5 A1 (in MGAT5 KO 1F12) | TTG...GCAGga-----GAGCTCAACCTGGTGCTGG                        |                         | -19   | 56                  |
| MGAT5 KO                  | REF                       | GGGCC <u>A</u> taC-----gctggagtcatgacagcTTAT                | GCTGTCATGACTCCAGCGTA    |       |                     |
|                           | 1F12_A1                   | GGGCCAtacA-----gctggagtcatgacagcTTAT                        |                         | +1    | 74                  |
|                           | 1F12_A2                   | GGGCCACATGACATAGgctggagtcatgacagcTTAT                       |                         | +7    | 73                  |
| <u>O-GalNAc</u>           |                           |                                                             |                         |       |                     |
| C1GALT1C1 KO <sup>2</sup> | REF                       | ATCACCCCAACCAGGTAGTagaaggctGTTGTT <u>CAGATAT</u>            | AGAAGGCT (ZFN cut site) |       |                     |
|                           | D5_A1                     | ATCACCCCAACCAGGTA-----GTTGTT <u>CAGATAT</u>                 |                         | -10   | 267                 |

<sup>1</sup> Sequences are shown in the orientation of the gene, with sgRNA recognition sequences (direct or complementary)/ZFN cut sites in lower case and PAM sequences underlined

<sup>2</sup> Radhakrishnan *et al.*, 2014 (DOI: 10.1073/pnas.1406619111)

|                                 |        |                                                         |                      |     |     |
|---------------------------------|--------|---------------------------------------------------------|----------------------|-----|-----|
| <i>C1GALT1</i> KO               | REF    | GCCC <u>A</u> gcgttgtaacaaagtgttgtTTATGAGTTCAGAA        | ACAACACTTTGTTACAACGC |     |     |
|                                 | 2E5_A1 | GCCCAG--TTGTAACAAAAGTGTGTTTATGAGTTCAGAA                 |                      | -2  | 114 |
|                                 | 2E5_A2 | GCCCAGCG-----TGTGTTTATGAGTTCAGAA                        |                      | -11 | 115 |
| <i>GCNT1</i> KO                 | REF    | AATC <u>ACC</u> TtctccgttttaaggattcatCAA                | ATGAATCCTTAAAACGGAGA |     |     |
|                                 | 2E7_A1 | AAT-----ttaaggattcatCAA                                 |                      | -13 | 27  |
|                                 | 2E7_A2 | AATCACCTtc--cgttAATGgattcatCAA                          |                      | -2  | 30  |
| <i>ST3GAL1</i> KO               | REF    | TGGT <u>GCC</u> Cttc-aagaccatcgacttgaGTGGG              | TCCAAGTCGATGGTCTTGAA |     |     |
|                                 | 2B2_A1 | TGGT <u>GCC</u> CttcAaagaccatcgacttgaGTGGG              |                      | +1  | 210 |
| <u>GAG</u><br><i>B4GALT7</i> KO | REF    | TGCACGACGTtgacctgctccctctcaa-cg <u>AGG</u> AGCTGGAC     | TGACCTGCTCCCTCTCAACG |     |     |
|                                 | 3D9_A1 | TGCACGACGTtgacctgctccctctcaaAcgAGGAGCTGGAC              |                      | +1  | 170 |
|                                 | 3D9_A2 | TGCACGACGTtgacctgctccctctc-----AC                       |                      | -13 | 170 |
| <u>GSL</u><br><i>B4GALT5</i> KO | REF    | AGCCTTCTGATTGCat-----gccTCGGTGGGAAG                     | ATGCC (ZFN cut site) |     |     |
|                                 | D11_A1 | AGCCTTCTGATTGCATGTAGAATTCCCTAGCCTCGGTGGGAAG             |                      | +13 | 160 |
| <i>ST3GAL5</i> KO               | REF    | GTTat <sup>t</sup> tgagcacaggtata-gcg <u>TGG</u> ACTTAC | ATTTGAGCACAGGTATAGCG |     |     |
|                                 | 1C5_A1 | GTTat <sup>t</sup> tgagcacaggtataCgcgTGGACTTAC          |                      | +1  | 138 |
|                                 | 1C5_A2 | GTTat <sup>t</sup> tgagcGTAA-----TGGACTTAC              |                      | -8  | 135 |

**Supplementary Table 2. CS disaccharide quantification in HaCaT WT.**

| Standards     |         |              |                   |                               |                          | HaCaT WT                      |           |         |       |
|---------------|---------|--------------|-------------------|-------------------------------|--------------------------|-------------------------------|-----------|---------|-------|
| Name          | MW      | Abbreviation | Elution time, min | Fluorescence signal intensity | Picomoles/fluoresc. unit | Fluorescence signal intensity | Picomoles | Molar % | µg    |
| UA2S-GalNAc4S | 605.388 | D2A4         | 24.060            | 2279265                       | 0.000008775              | 1102217                       | 9.6717    | 1.70    | 0.006 |
| UA-GalNAc4S6S | 605.388 | D0A10        | 26.241            | 2525125                       | 0.000007920              | 8385507                       | 66.4166   | 11.70   | 0.040 |
| UA2S-GalNAc6S | 605.388 | D2A6         | 26.754            | 3868465                       | 0.000005170              | 1732606                       | 8.9576    | 1.58    | 0.005 |
| UA-GalNAc4S   | 503.344 | D0A4         | 29.134            | 1997232                       | 0.000010014              | 32580632                      | 326.2579  | 57.46   | 0.164 |
| UA2S-GalNAc   | 503.344 | D2A0         | 29.412            | 5229740                       | 0.000003824              | 0                             | 0.0000    | 0.00    | 0.000 |
| UA-GalNAc6S   | 503.344 | D0A6         | 30.810            | 2541577                       | 0.000007869              | 18234958                      | 143.4933  | 25.27   | 0.072 |
| UA-GalNAc     | 401.300 | D0A0         | 33.046            | 2631878                       | 0.000007599              | 1706858                       | 12.9706   | 2.28    | 0.005 |

**Supplementary Table 3. HS disaccharide quantification in HaCaT WT.**

| Standards                  |         |              |                   |                               |                          | HaCaT WT                      |           |         |       |
|----------------------------|---------|--------------|-------------------|-------------------------------|--------------------------|-------------------------------|-----------|---------|-------|
| Name                       | MW      | Abbreviation | Elution time, min | Fluorescence signal intensity | Picomoles/fluoresc. unit | Fluorescence signal intensity | Picomoles | Molar % | µg    |
| UA-GlcNAc                  | 401.300 | IV-A         | 52.718            | 1509711                       | 0.00001325               | 12516037                      | 165.8071  | 15.29   | 0.067 |
| UA2S-GlcNAc                | 503.344 | III-A        | 47.949            | 1930891                       | 0.00001036               | 2358398                       | 24.4281   | 2.25    | 0.012 |
| UA-GlcNAc6S                | 503.344 | II-A         | 40.829            | 1923938                       | 0.00001040               | ND*                           | 0.0000    | 0.00    | 0.000 |
| UA2S-GlcNAc6S              | 605.388 | I-A          | 37.379            | 1599135                       | 0.00001251               | 0                             | 0.0000    | 0.00    | 0.000 |
| UA-GlcNH <sub>2</sub>      | 337.281 | IV-H         | 37.996            | 2105780                       | 0.00000950               | 0                             | 0.0000    | 0.00    | 0.000 |
| UA2S-GlcNH <sub>2</sub>    | 461.307 | III-H        | 35.017            | 1596156                       | 0.00001253               | 59749                         | 0.7487    | 0.07    | 0.000 |
| UA-GlcNH <sub>2</sub> 6S   | 461.307 | II-H         | 30.481            | 1591894                       | 0.00001256               | 0                             | 0.0000    | 0.00    | 0.000 |
| UA2S-GlcNH <sub>2</sub> 6S | 564.359 | I-H          | 28.037            | 1643712                       | 0.00001217               | 0                             | 0.0000    | 0.00    | 0.000 |
| UA-GlcNS                   | 461.307 | IV-S         | 25.568            | 1710782                       | 0.00001169               | 32235845                      | 376.8551  | 34.75   | 0.174 |
| UA2S-GlcNS                 | 563.351 | III-S        | 20.983            | 1578920                       | 0.00001267               | 22187109                      | 281.0416  | 25.91   | 0.158 |
| UA-GlcNS6S                 | 563.351 | II-S         | 16.089            | 1254200                       | 0.00001595               | 4449247                       | 70.9496   | 6.54    | 0.040 |
| UA2S-GlcNS6S               | 665.395 | I-S          | 13.790            | 1904574                       | 0.00001050               | 15293468                      | 160.5973  | 14.81   | 0.107 |
| UA-GlcNS3S                 | 563.351 | VIII-S       | 14.708            | 1645590                       | 0.00001215               | 64732                         | 0.7867    | 0.07    | 0.000 |
| UA2S-GlcNS3S               | 665.395 | VII-S        | 14.213            | 1936850                       | 0.00001033               | ND*                           | 0.0000    | 0.00    | 0.000 |
| UA-GlcNS3S6S               | 665.395 | VI-S         | 10.962            | 1452743                       | 0.00001377               | 25165                         | 0.3464    | 0.03    | 0.000 |
| UA2S-GlcNS3S6S             | 767.439 | V-S          | 10.459            | 1428129                       | 0.00001400               | 209107                        | 2.9284    | 0.27    | 0.002 |

\*ND – not quantified due to overlap with other peaks



**Supplementary Table 4.** Sequences of mutagenic primers. Altered nucleotides are shown in red.

| Name           | 5' to 3'                                       | Length |
|----------------|------------------------------------------------|--------|
| gB_T169A       | GTACTACAAAGACGTCGCCGTTTCGCAGGTGTG              | 33     |
| gB_T267A       | CCACCGGTACGGGGCGACGGTAAACTG                    | 27     |
| gB_T268A       | ACCGGTACGGGACGCGGTAAACTGCATC                   | 29     |
| gB_T267A_T268A | TCCACCGGTACGGGGCGGCGGTAAACTGCATC               | 32     |
| gB_T690A       | CCTGGAGGTGTACGCCCGCCACGAGATC                   | 28     |
| gB_T703A       | CCTGCTGGACTACCGGAGGTCCAGCG                     | 27     |
| gD_S33A        | CCTTGCGGATGCCGCTCTCAAGATGGCC                   | 29     |
| gD_T255A       | CGAGAACCAGCGCGCCGTCGCCGTATA                    | 27     |
| gD_S260A       | ACCGTCGCCGTATACGCCCTTGAAGATCGCCGG              | 32     |
| gD_T255A_S260A | CGAGAACCAGCGCGCCGTCGCCGTATACGCCCTTGAAGATCGCCGG | 45     |

**Supplementary Table 5.** Oligonucleotide sequences for annealing and cloning the DNA template for gRNA into the LentiCRISPR-V2 plasmid.

| Target gene    | gRNA targeting sequence (5' to 3') | 5' oligonucleotide sequence (5' to 3') | 3' oligonucleotide sequence (5' to 3') |
|----------------|------------------------------------|----------------------------------------|----------------------------------------|
| <i>MGAT1</i>   | TCGCCTGGCCCAAGACGCCG               | CACCGTCGCCTGGCCCAAGACGCCG              | AAACCGCGTCTTGGGCCAGGCGAC               |
| <i>MGAT4A</i>  | AATGAGATGAGGCTCCGCAA               | CACCGAATGAGATGAGGCTCCGCAA              | AAACTTGGGAGCCTCATCTCATTC               |
| <i>MGAT4B</i>  | GGAGAGCCTCAAGCGCTCCA               | CACCGGGAGAGCCTCAAGCGCTCCA              | AAACTGGAGCGCTTGAGGCTCTCCC              |
| <i>MGAT5</i>   | GCTGTCATGACTCCAGCGTA               | CACCGGCTGTCATGACTCCAGCGTA              | AAACTACGCTGGAGTCATGACAGCC              |
| <i>C1GALT1</i> | ACAACACTTTGTTACAACGC               | CACCGACAACACTTTGTTACAACGC              | AAACGCGTTGTAACAAAGTGTGTC               |
| <i>GCNT1</i>   | ATGAATCCTTAAAACGGAGA               | CACCGATGAATCCTTAAAACGGAGA              | AAACTCTCGTTTTTAAGGATTCATC              |
| <i>ST3GAL1</i> | TCCAAGTCGATGGTCTTGAA               | CACCGTCCAAGTCGATGGTCTTGAA              | AAACTTCAAGACCATCGACTTGGAC              |
| <i>B4GALT7</i> | TGACCTGCTCCCTCTCAACG               | CACCGTGACCTGCTCCCTCTCAACG              | AAACCGTTGAGAGGGAGCAGGTCAC              |
| <i>ST3GAL5</i> | ATTTGAGCACAGGTATAGCG               | CACCGATTTGAGCACAGGTATAGCG              | AAACCGCTATACCTGTGCTCAAATC              |

# Supplementary Figure 1. N-glycoprofiling

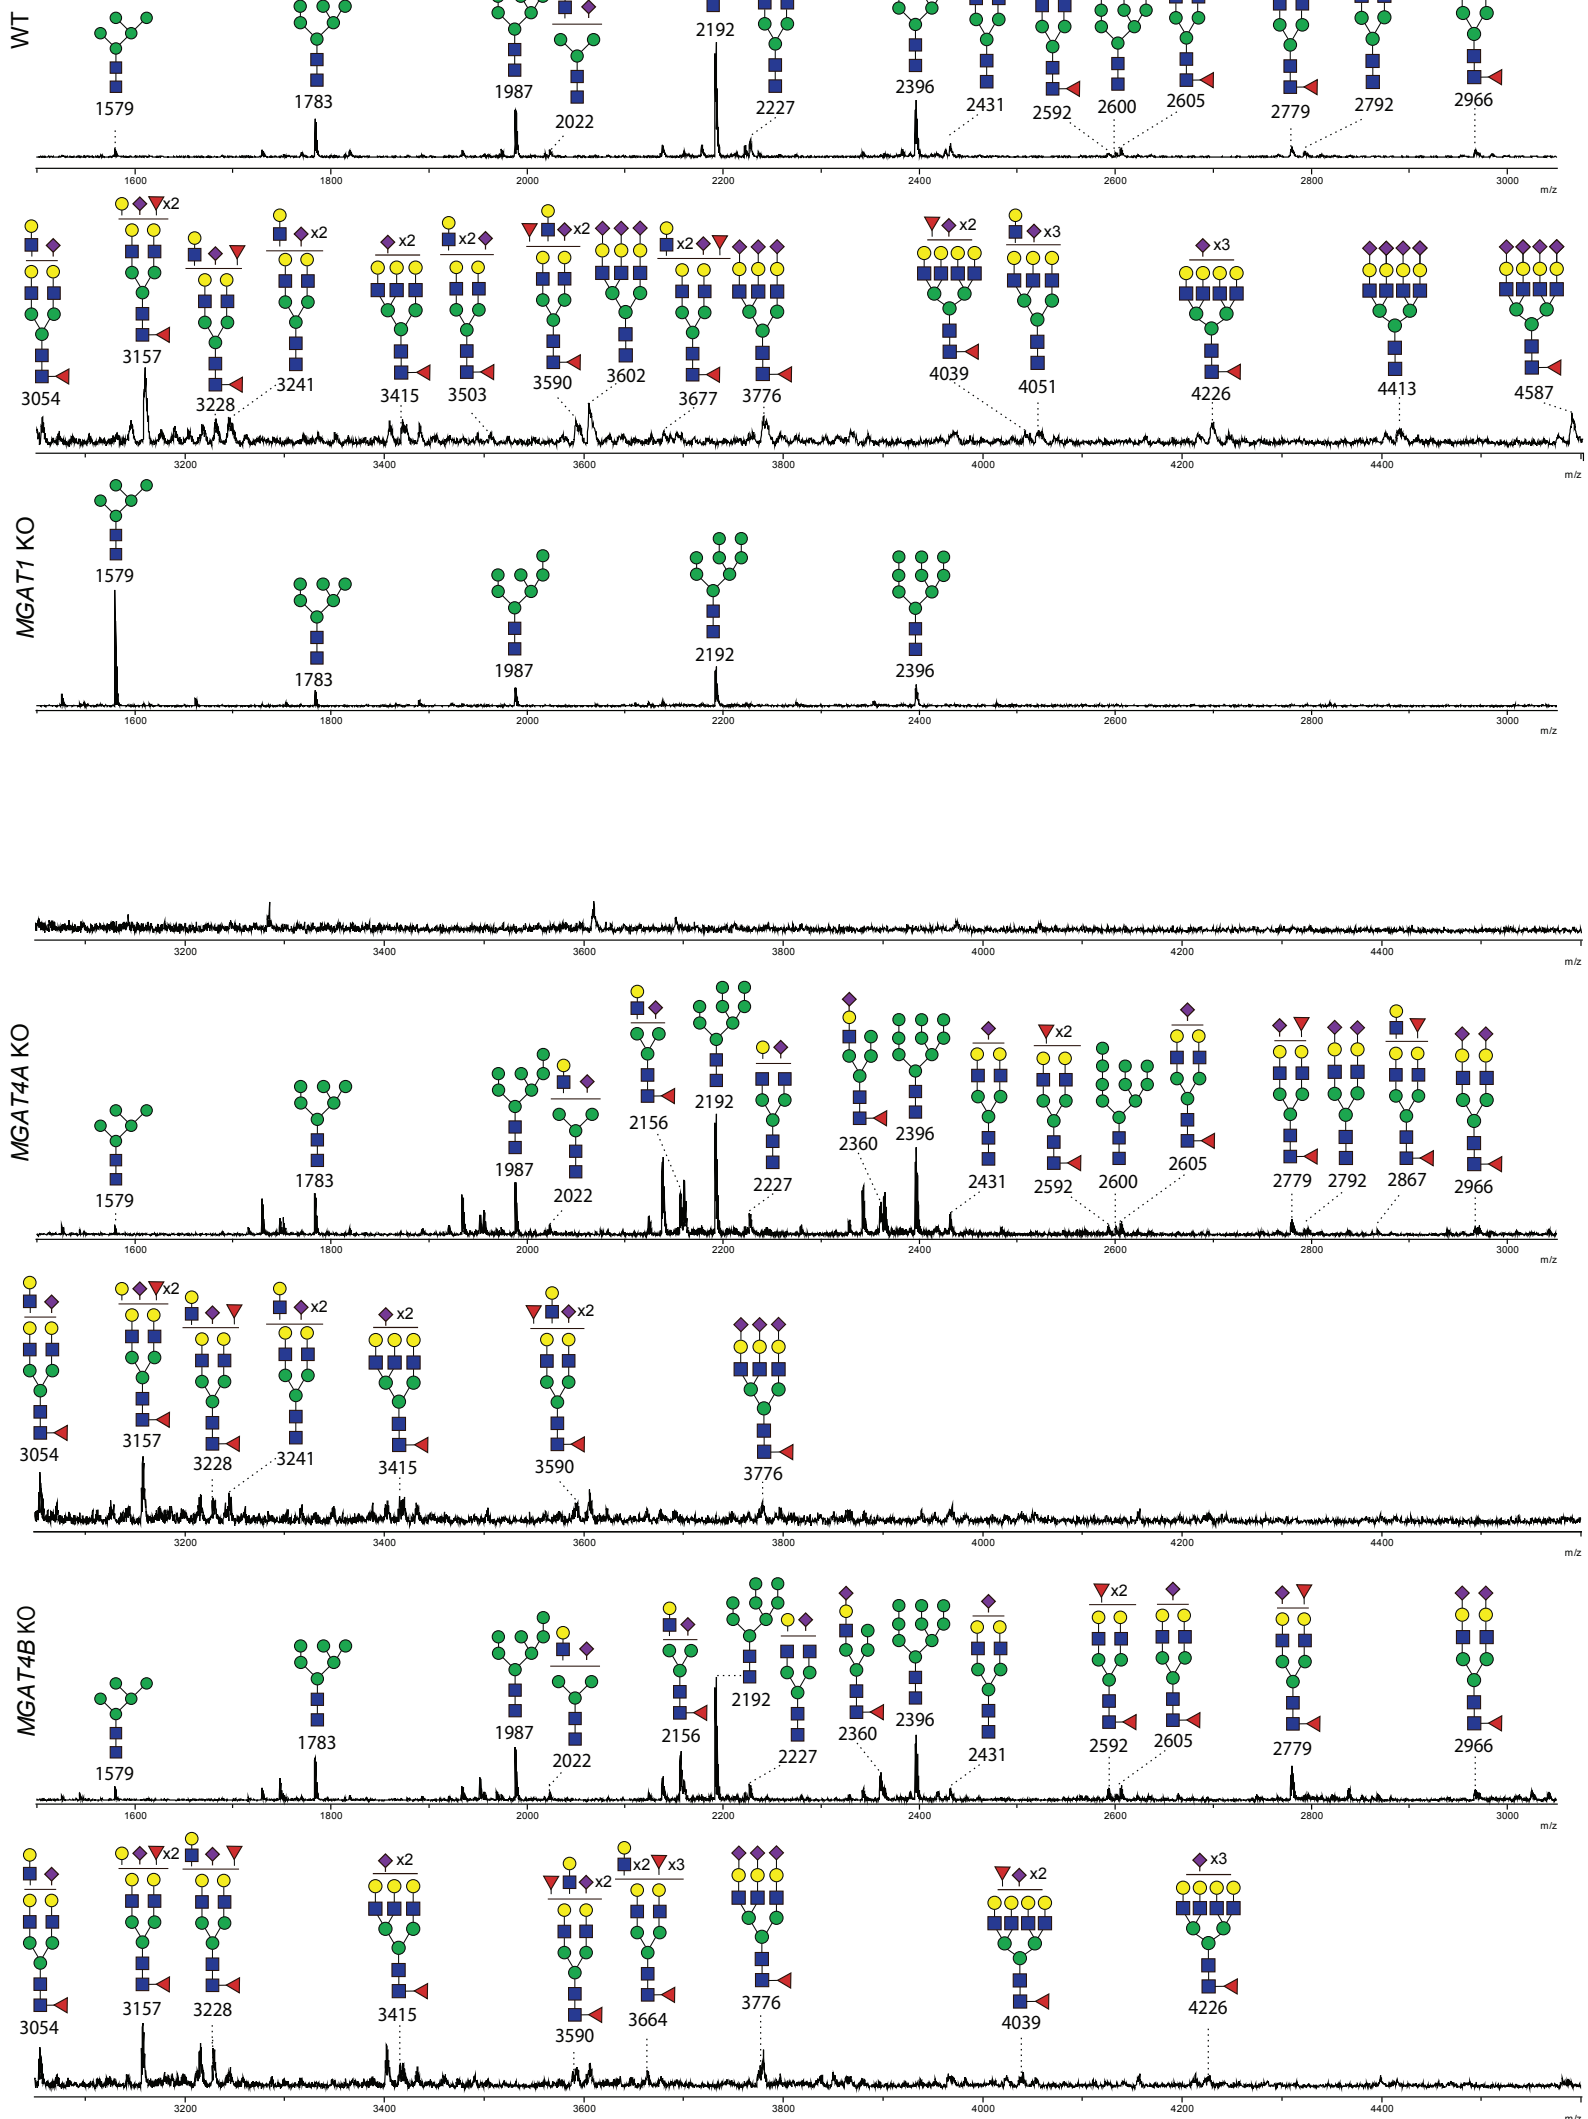

MGAT5 KO

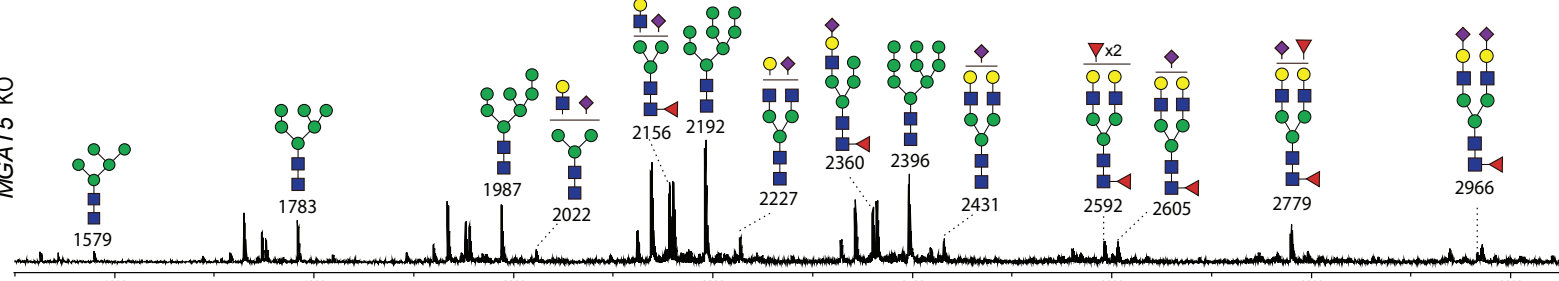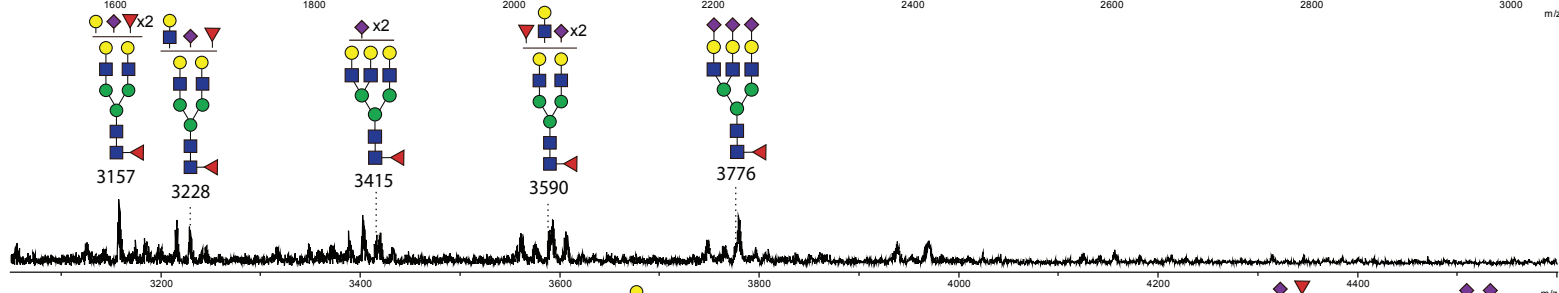

MGAT4B/5 KO

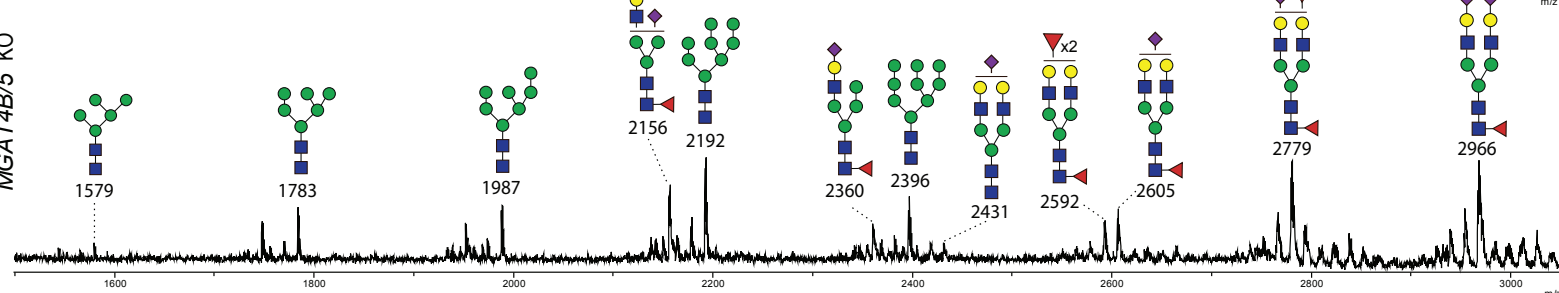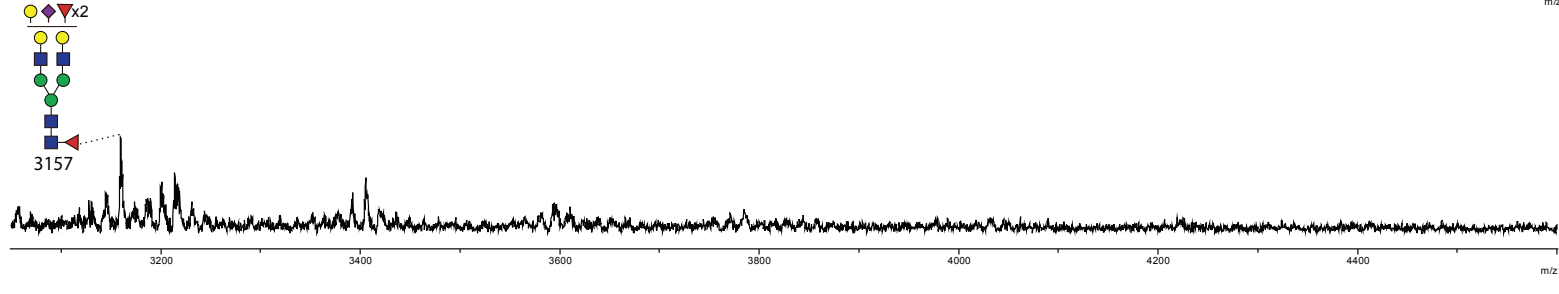

# Supplementary Figure 2. CORA O-glycoprofilng

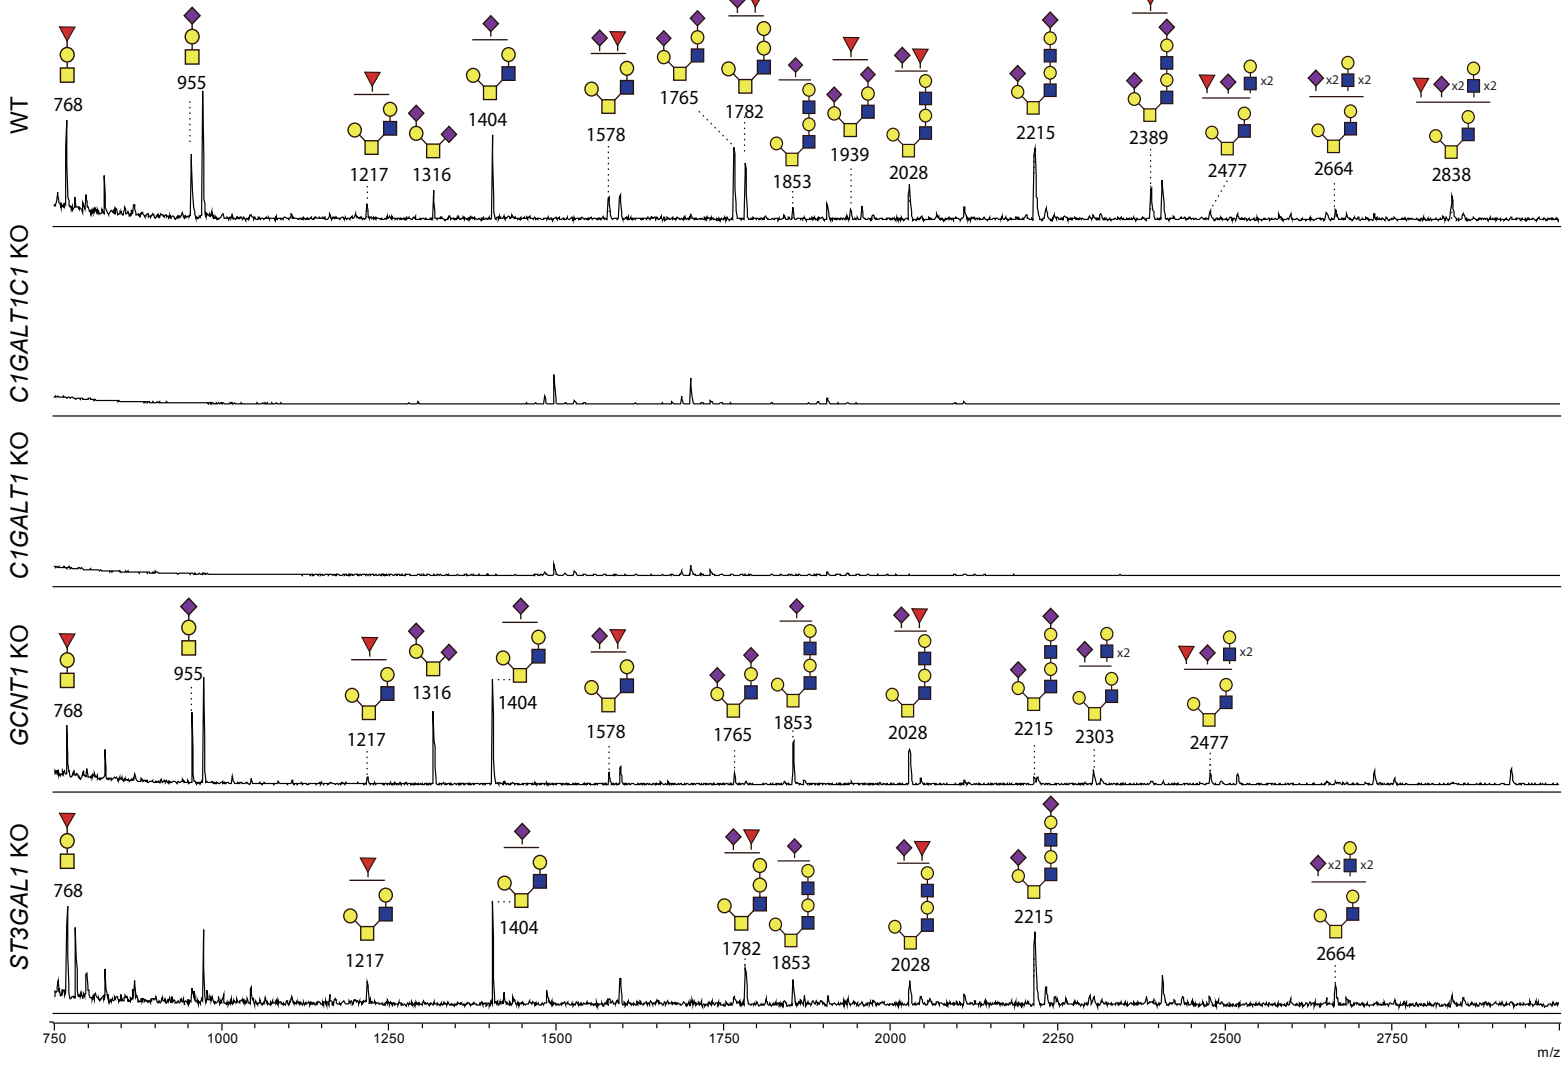

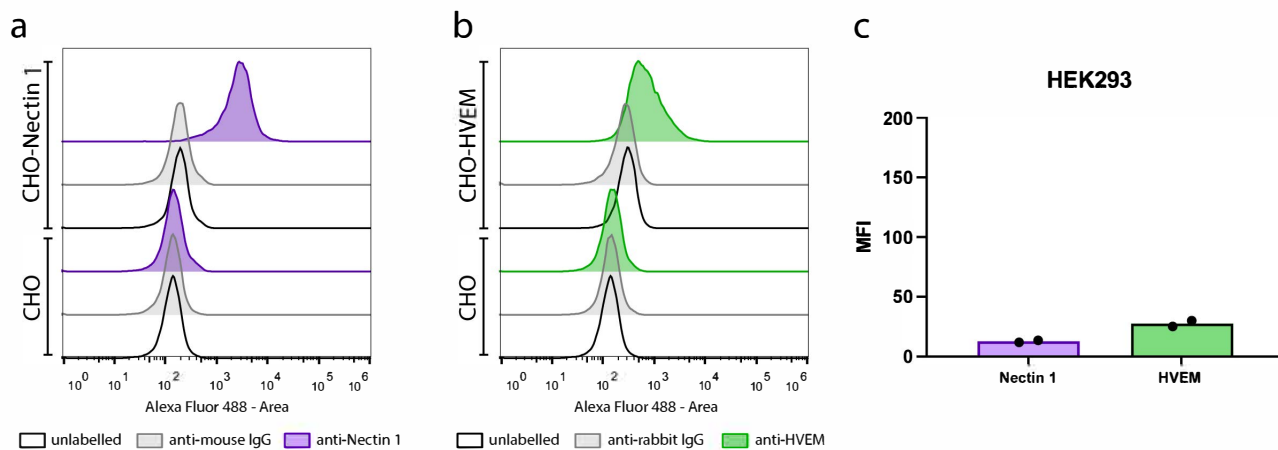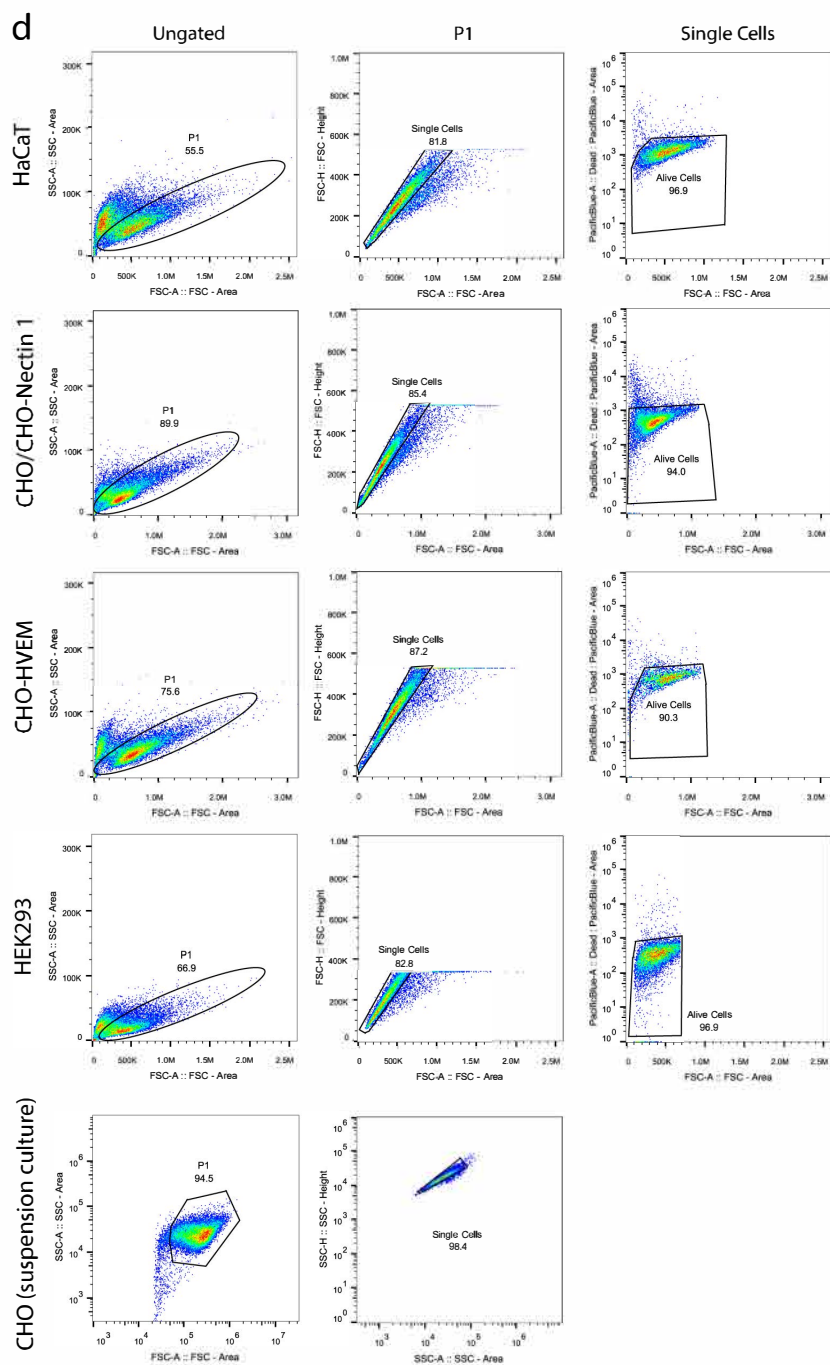

Related to Fig. 2i

Related to Supplementary Fig. 3a and 3b

Related to Supplementary Fig. 3b

Related to Supplementary Fig. 3c

Related to Fig. 2h

**Supplementary Figure 3. Flow cytometry supporting data. a** Nectin 1 cell surface expression in CHO-Nectin 1 and parental CHO cell line. **b** HVEM cell surface expression in CHO-HVEM and parental CHO cell line. **c** Nectin 1 and HVEM cell surface expression in HEK293 cells. Background corrected median fluorescence intensity from two independent experiments is shown. **d** Gating strategies for various cell lines used for flow cytometry.



**Supplementary Figure 5. Sequencing of DNA constructs.** Multiple sequence alignment for the DNA regions corresponding to the positions of introduced single amino acid mutations in HSV-1 gB and gD expression constructs. Asterisks indicate identical nucleotides.

```

gB Tyr165-Val173      TyrLysAspValThrValSerGlnVal
                      Y K D V T V S Q V
gB_WT                 TACAAAGACGTCACCGTTTCGCAGGTG 27
gB_T169A              TACAAAGACGTCGCCGTTTCGCAGGTG 27
gB_T267A              TACAAAGACGTCACCGTTTCGCAGGTG 27
gB_T268A              TACAAAGACGTCACCGTTTCGCAGGTG 27
gB_T267A_T268A       TACAAAGACGTCACCGTTTCGCAGGTG 27
gB_T690A              TACAAAGACGTCACCGTTTCGCAGGTG 27
gB_T703A              TACAAAGACGTCACCGTTTCGCAGGTG 27
gB_T690A_T703A       TACAAAGACGTCACCGTTTCGCAGGTG 27
gB_T169A_T267A_T268A TACAAAGACGTCGCCGTTTCGCAGGTG 27
                      *****

gB His263-Ile272     HisArgTyrGlyThrThrValAsnCysIle
                      H R Y G T T V N C I
gB_WT                 CACCGGTACGGGACGACGTAACACTGCATC 30
gB_T169A              CACCGGTACGGGACGACGTAACACTGCATC 30
gB_T267A              CACCGGTACGGGGCGACGTAACACTGCATC 30
gB_T268A              CACCGGTACGGGACGCGGTAACACTGCATC 30
gB_T267A_T268A       CACCGGTACGGGGCGCGGTAACACTGCATC 30
gB_T690A              CACCGGTACGGGACGACGTAACACTGCATC 30
gB_T703A              CACCGGTACGGGACGACGTAACACTGCATC 30
gB_T690A_T703A       CACCGGTACGGGACGACGTAACACTGCATC 30
gB_T169A_T267A_T268A CACCGGTACGGGGCGCGGTAACACTGCATC 30
                      *****

gB Glu687-Gln706    GluValTyrThrArgHisGluIleLysAspSerGlyLeuLeuAspTyrThrGluValGln
                      E V Y T R H E I K D S G L L D Y T E V Q
gB_WT                 GAGGTGTACACCCGCCACGAGATCAAGGACAGCGGCCTGCTGGACTACACGGAGGTCCAG 60
gB_T169A              GAGGTGTACACCCGCCACGAGATCAAGGACAGCGGCCTGCTGGACTACACGGAGGTCCAG 60
gB_T267A              GAGGTGTACACCCGCCACGAGATCAAGGACAGCGGCCTGCTGGACTACACGGAGGTCCAG 60
gB_T268A              GAGGTGTACACCCGCCACGAGATCAAGGACAGCGGCCTGCTGGACTACACGGAGGTCCAG 60
gB_T267A_T268A       GAGGTGTACACCCGCCACGAGATCAAGGACAGCGGCCTGCTGGACTACACGGAGGTCCAG 60
gB_T690A              GAGGTGTACGCCGCCACGAGATCAAGGACAGCGGCCTGCTGGACTACACGGAGGTCCAG 60
gB_T703A              GAGGTGTACACCCGCCACGAGATCAAGGACAGCGGCCTGCTGGACTACGCCGAGGTCCAG 60
gB_T690A_T703A       GAGGTGTACGCCGCCACGAGATCAAGGACAGCGGCCTGCTGGACTACGCCGAGGTCCAG 60
gB_T169A_T267A_T268A GAGGTGTACACCCGCCACGAGATCAAGGACAGCGGCCTGCTGGACTACACGGAGGTCCAG 60
                      *****

gD Leu29-Ala37      LeuAlaAspAlaSerLeuLysMetAla
                      L A D A S L K M A
gD_WT                 TTGGCGGATGCCTCTCTCAAGATGGCC 27
gD_S33A               TTGGCGGATGCCTCTCTCAAGATGGCC 27
gD_T255A              TTGGCGGATGCCTCTCTCAAGATGGCC 27
gD_S260A              TTGGCGGATGCCTCTCTCAAGATGGCC 27
gD_T255A_S260A       TTGGCGGATGCCTCTCTCAAGATGGCC 27
gD_S33A_T255A_S260A TTGGCGGATGCCTCTCTCAAGATGGCC 27
                      *****

gD Glu251-Ala264    GluAsnGlnArgThrValAlaValTyrSerLeuLysIleAla
                      E N Q R T V A V Y S L K I A
gD_WT                 GAGAACCAGCGCACCGTTCGCGGTATACAGCTTGAAGATCGCC 42
gD_S33A               GAGAACCAGCGCACCGTTCGCGGTATACAGCTTGAAGATCGCC 42
gD_T255A              GAGAACCAGCGCGCCGTCGCGGTATACAGCTTGAAGATCGCC 42
gD_S260A              GAGAACCAGCGCACCGTTCGCGGTATACGCCCTTGAAGATCGCC 42
gD_T255A_S260A       GAGAACCAGCGCGCCGTCGCGGTATACGCCCTTGAAGATCGCC 42
gD_S33A_T255A_S260A GAGAACCAGCGCGCCGTCGCGGTATACGCCCTTGAAGATCGCC 42
                      *****

```



**Supplementary Figure 6. Section panels of HSV-1-infected glycoengineered organotypic skin.** 36 hours post-infection the tissues were fixed in formalin and two independent series of 10 consecutive sections with 30  $\mu\text{m}$  intervals were stained with goat anti-HSV-1 FITC pAb followed by imaging with a fluorescence-equipped slide scanner.

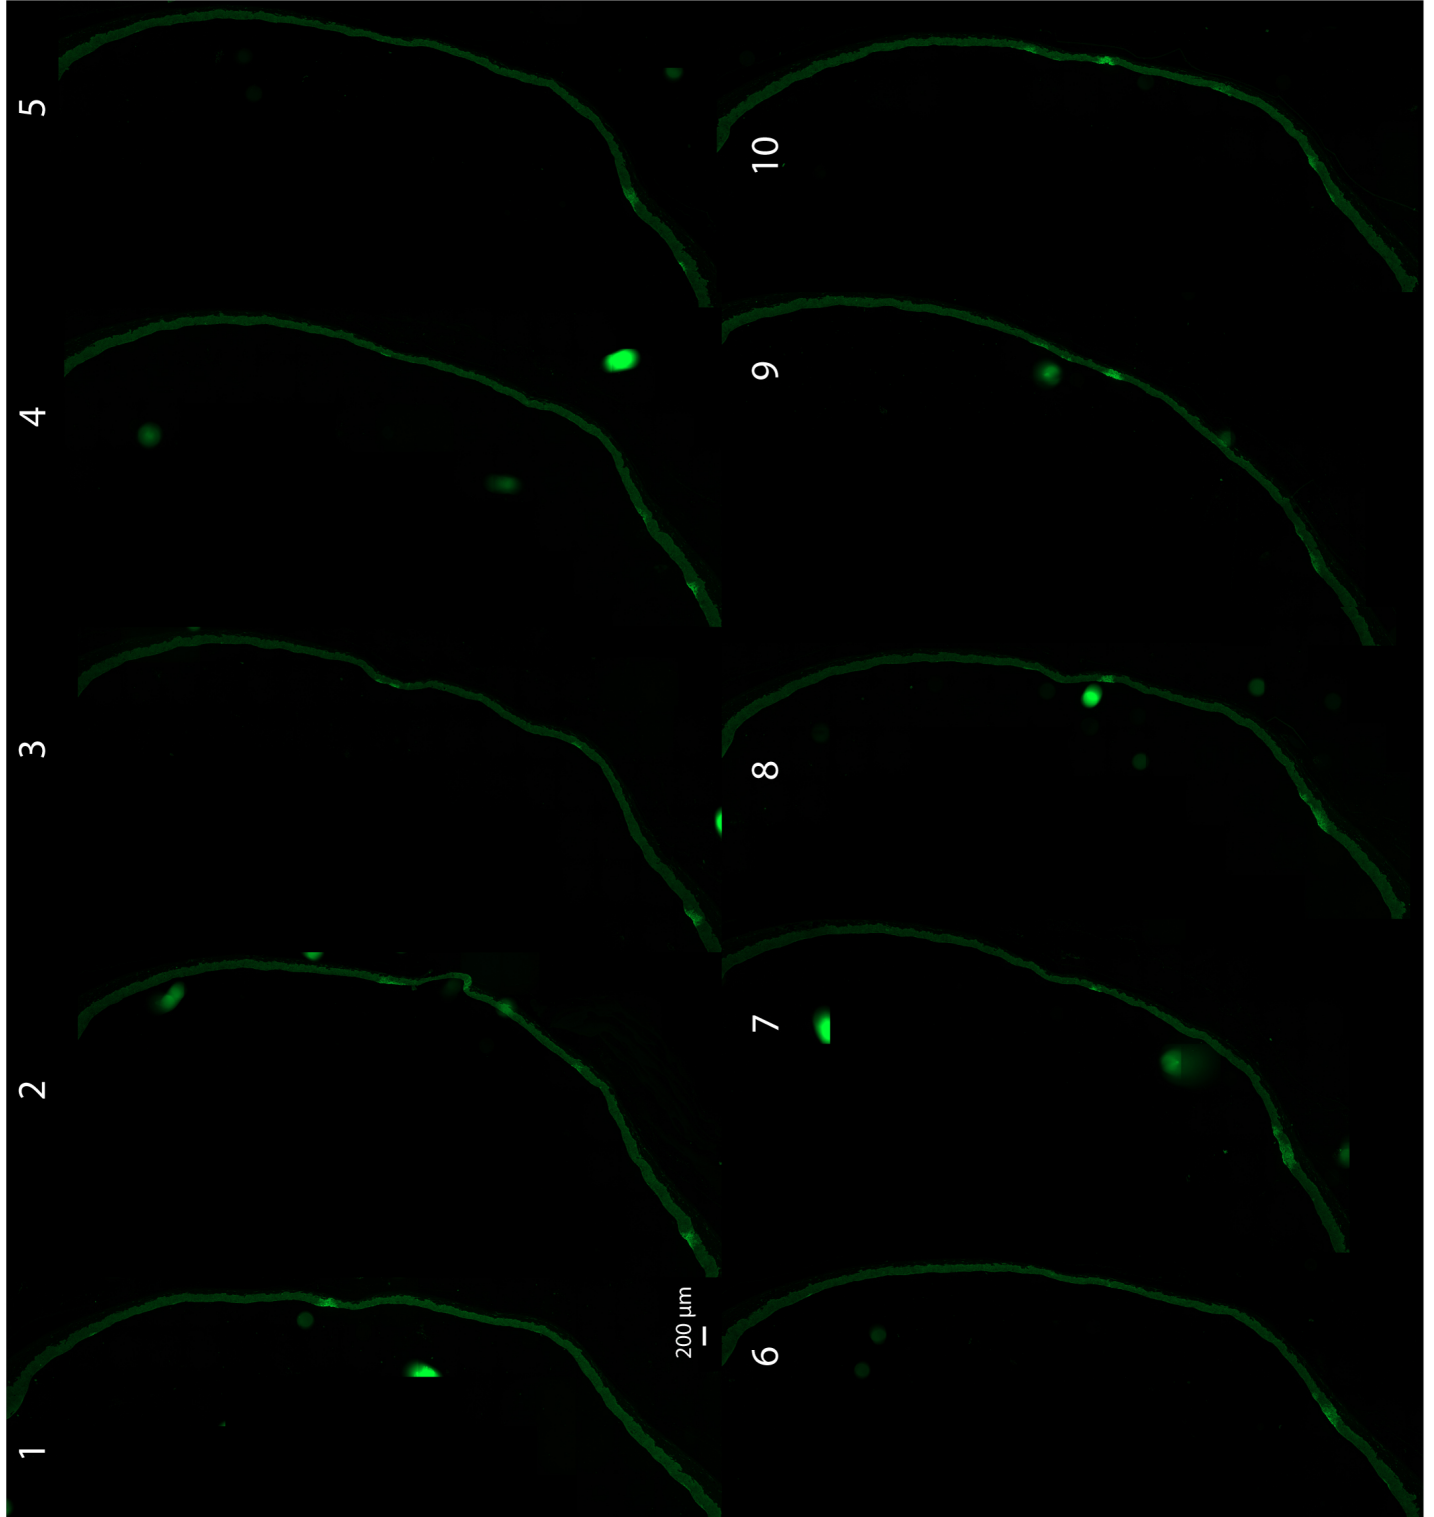

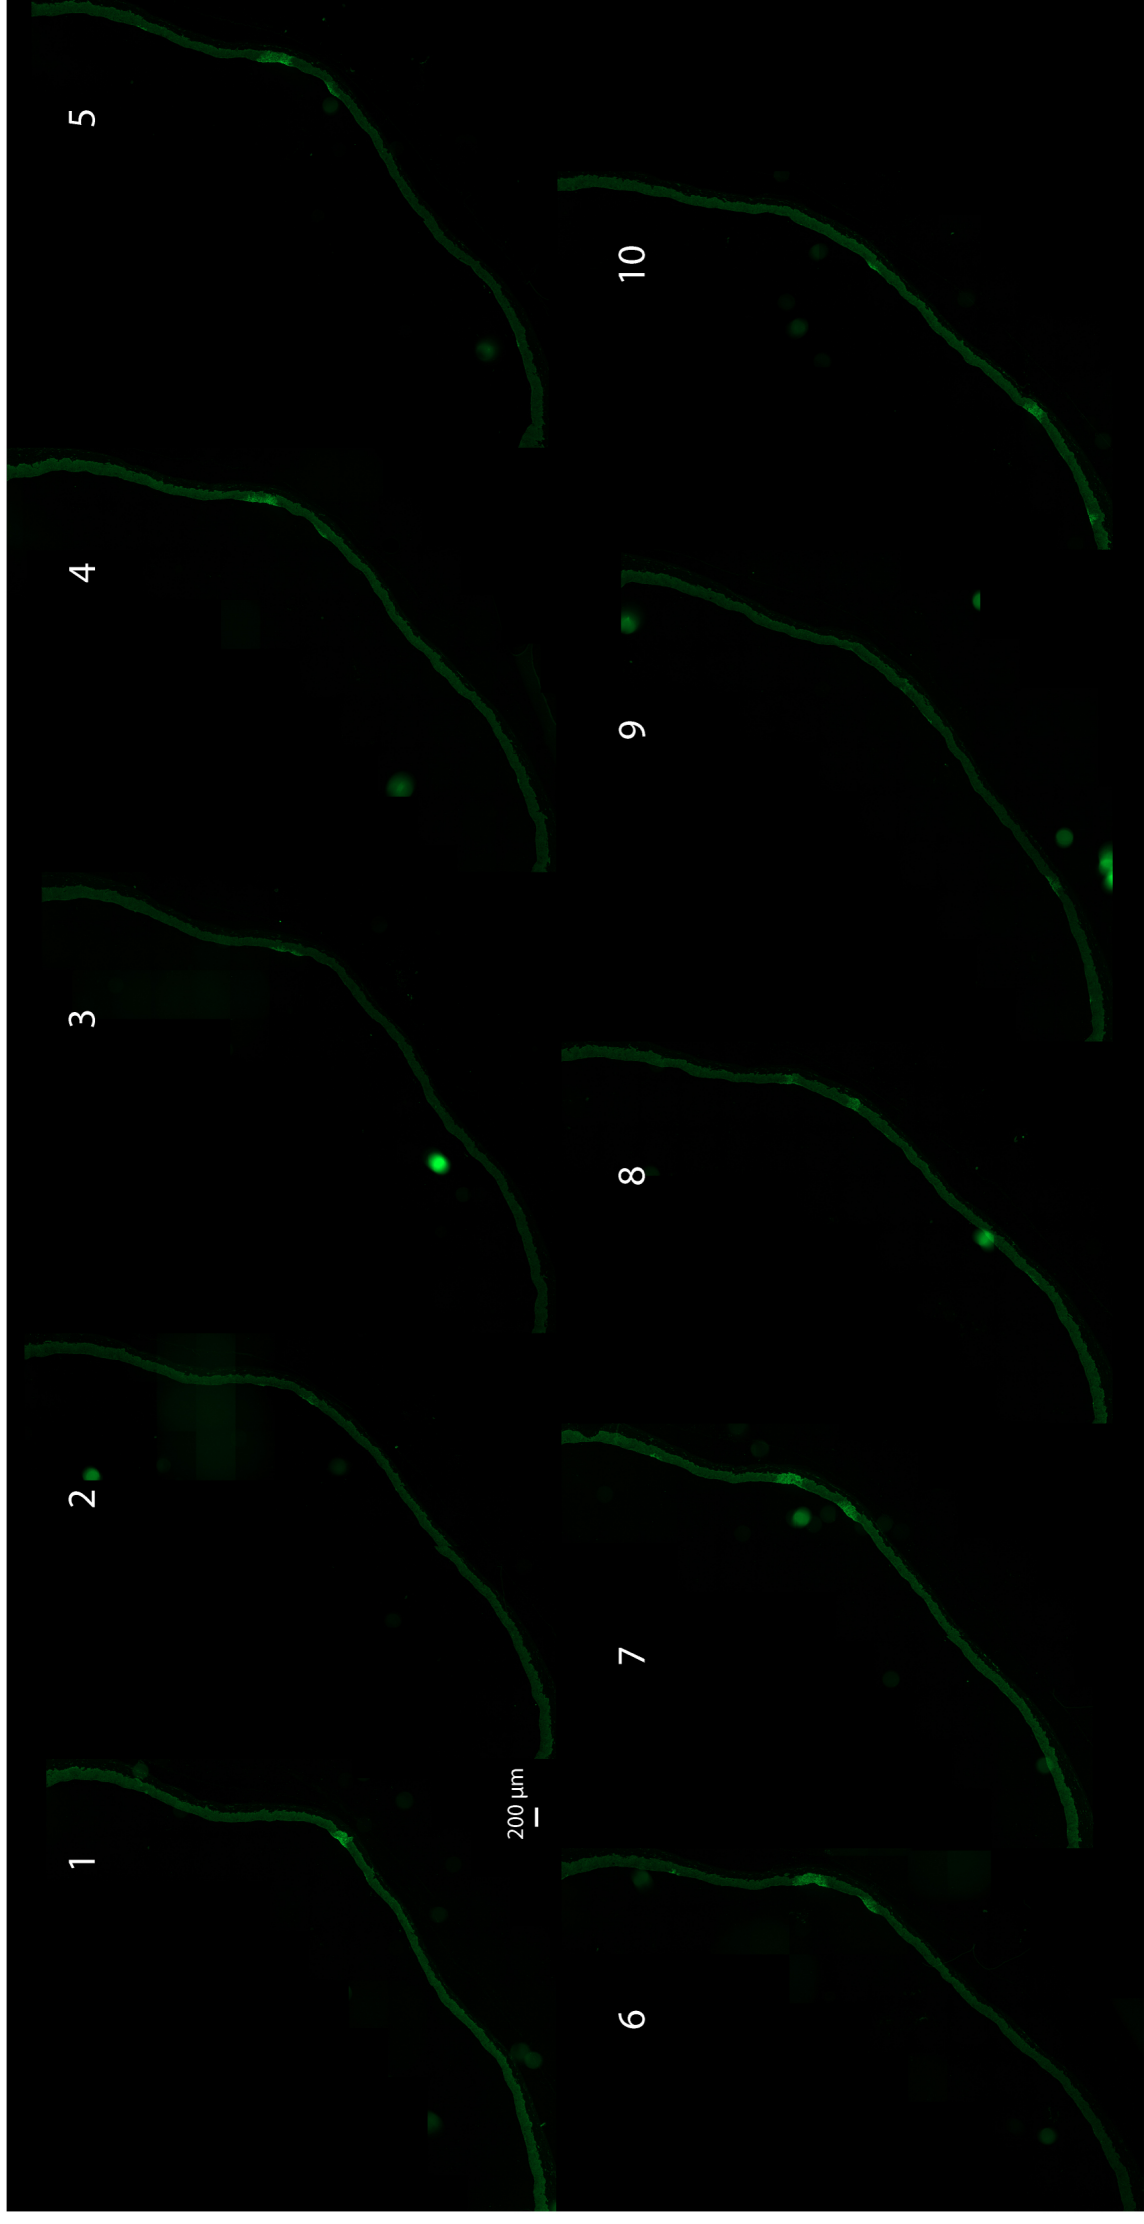

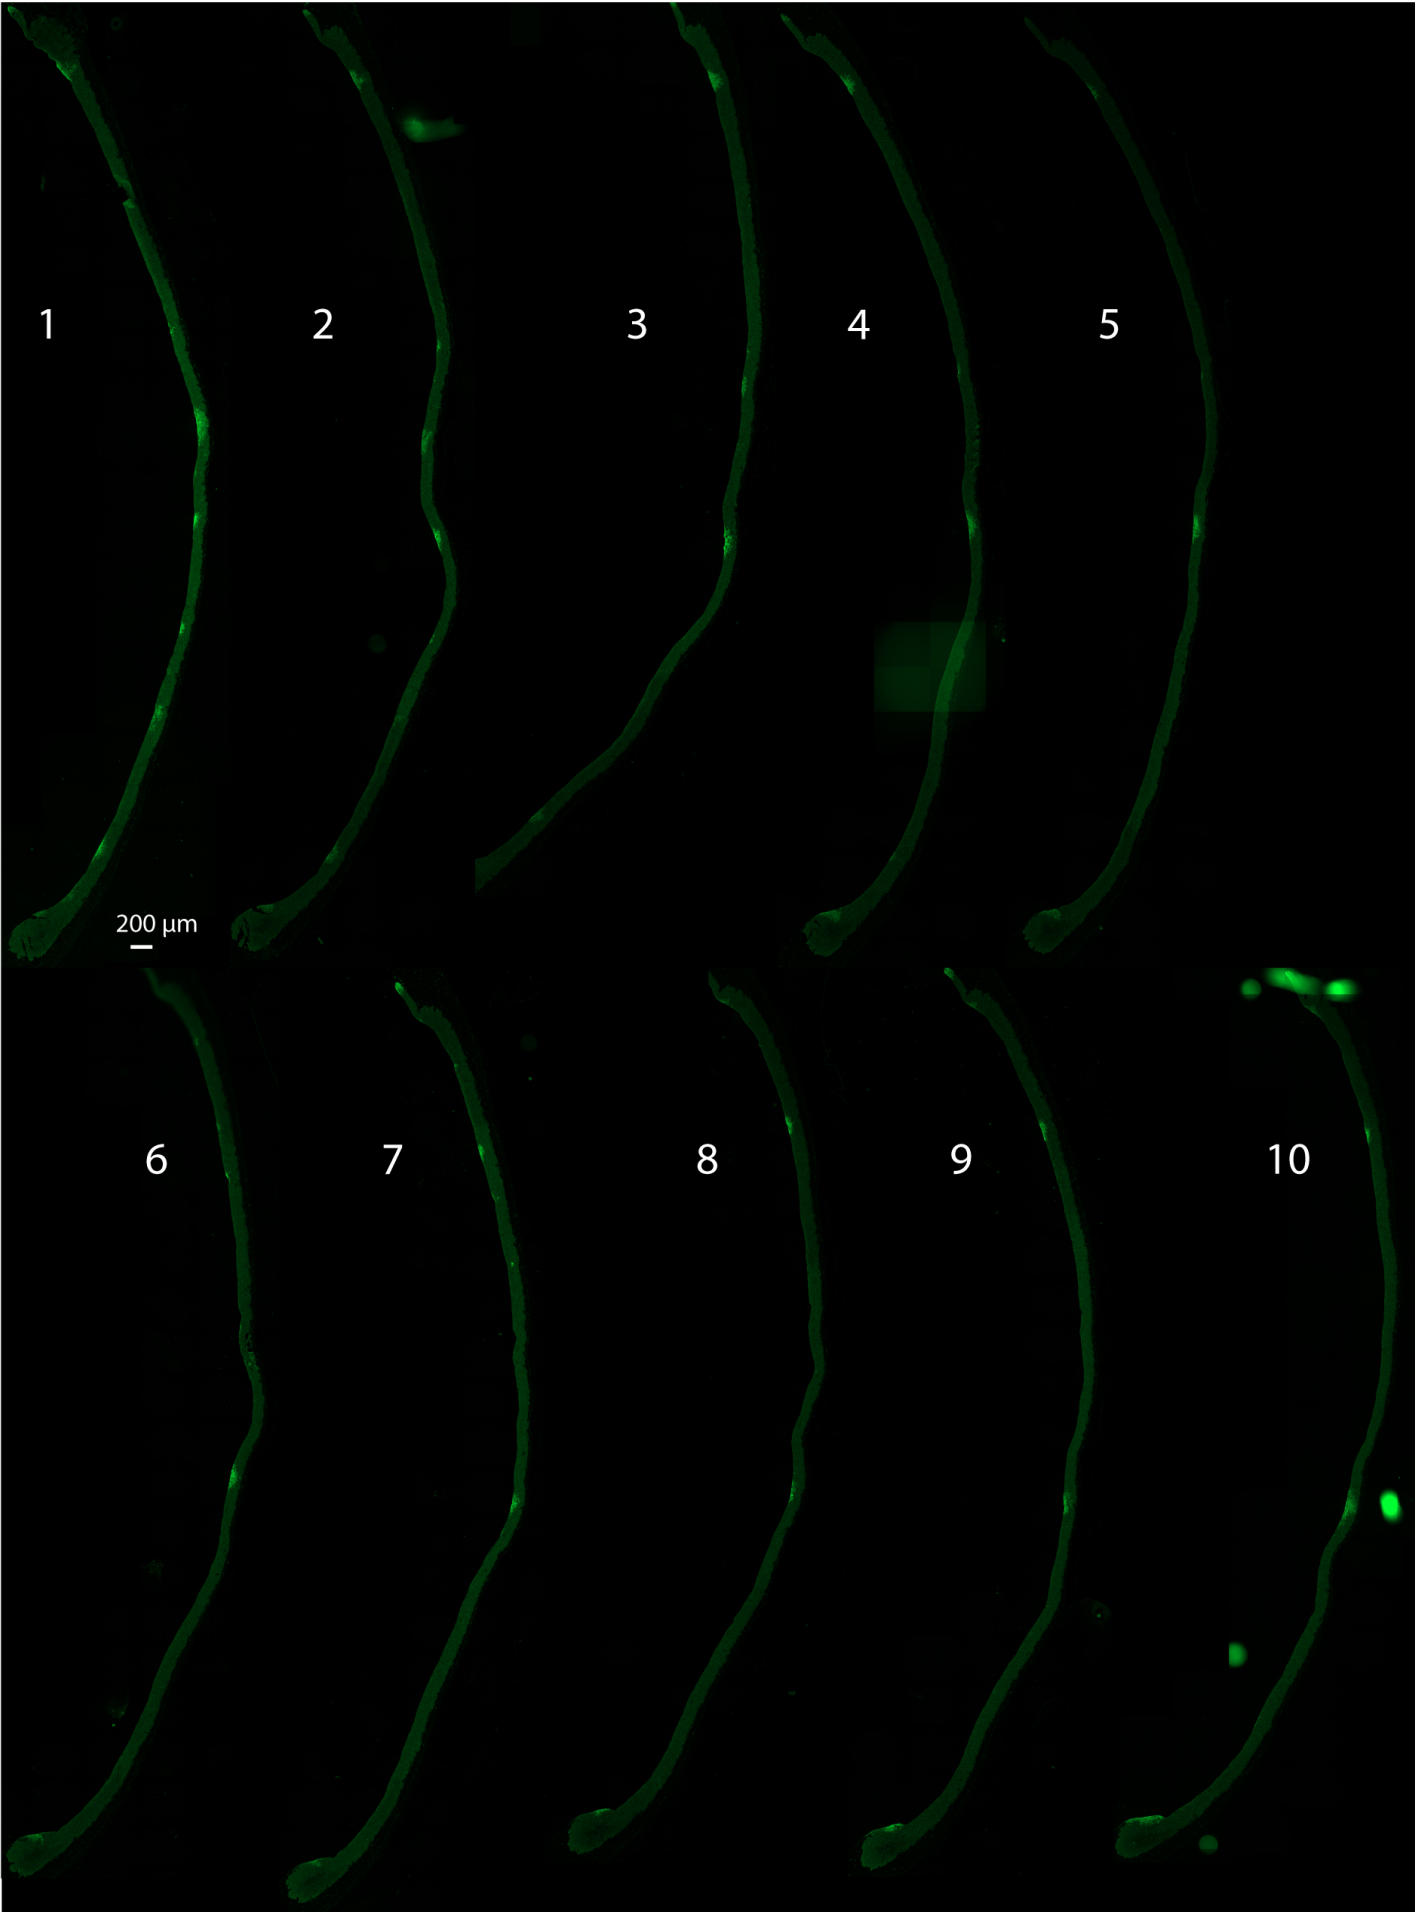

X010780 *MGAT1* KO 1E7 + HSV-1 36 h section series 2

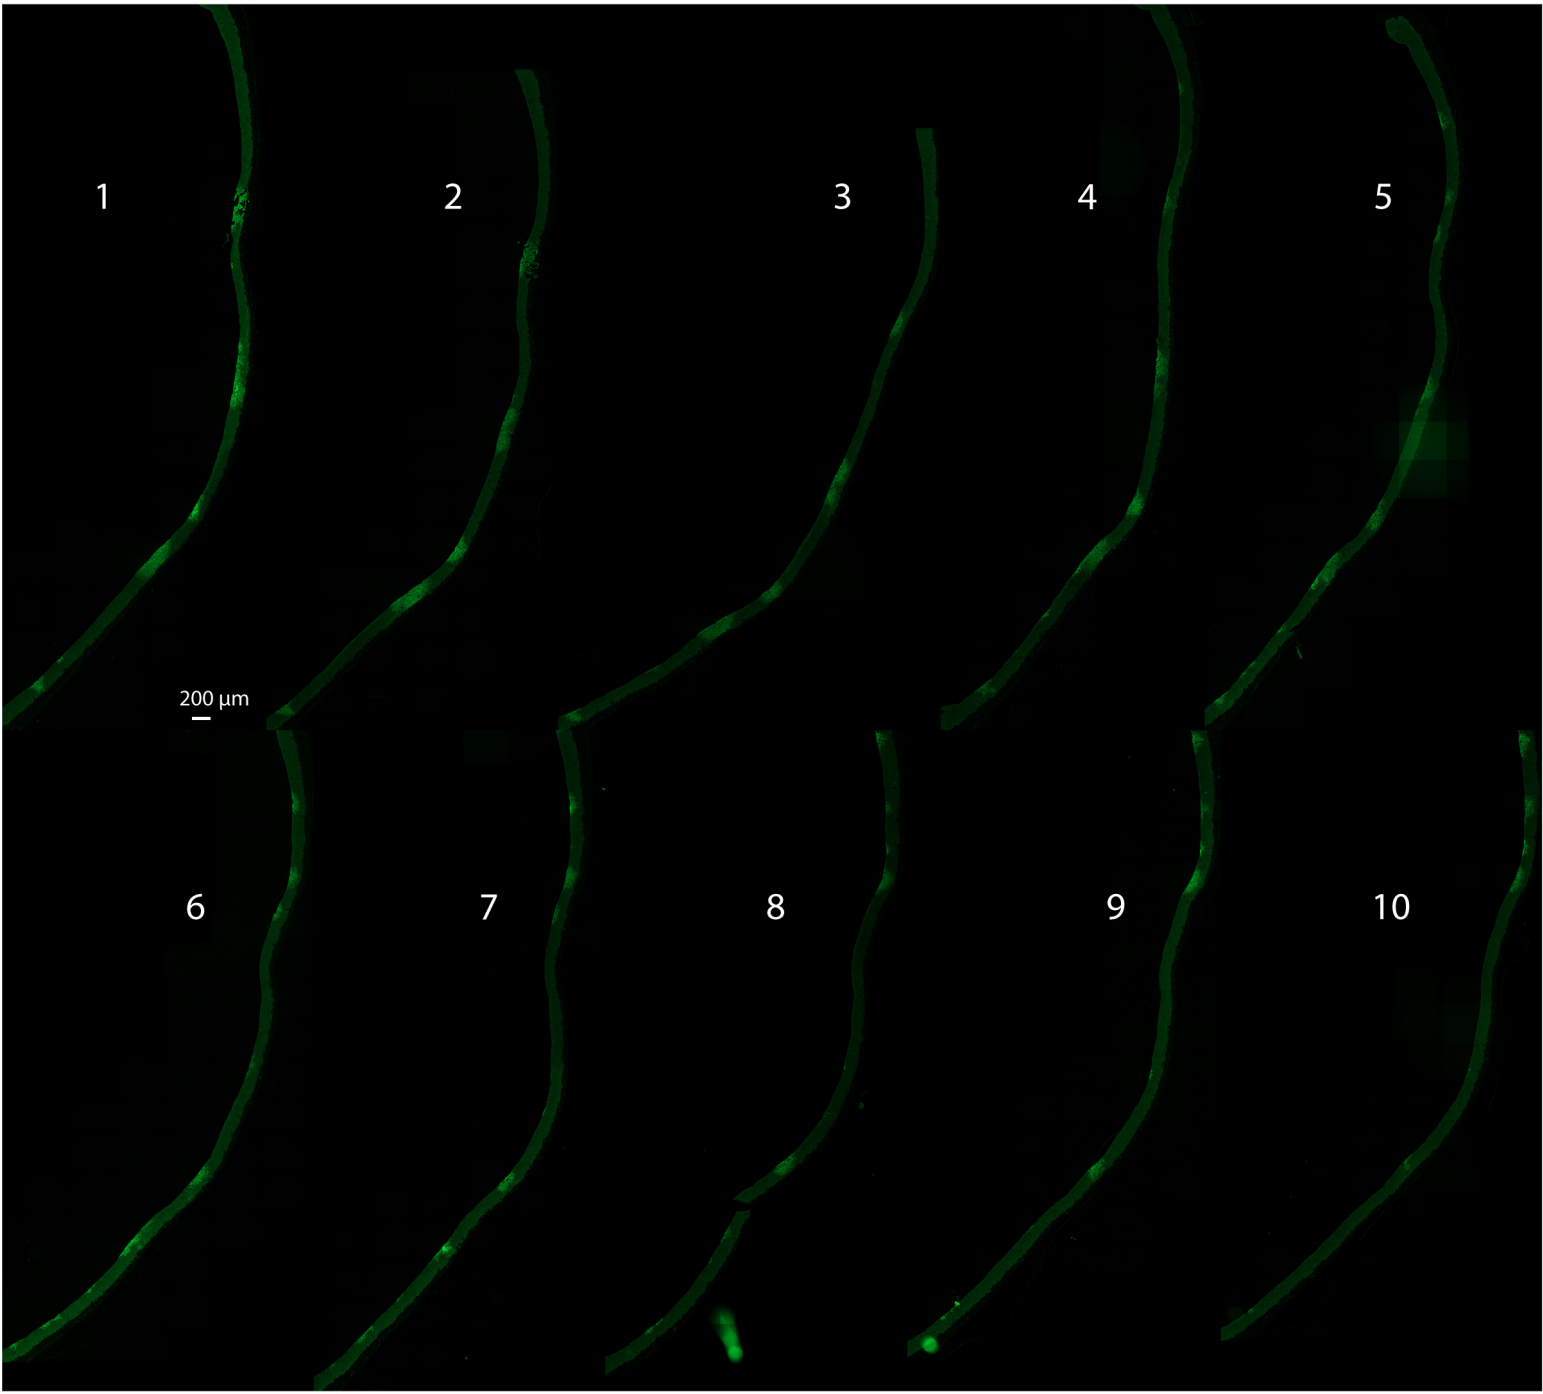

X01078P *MGAT4A* KO 3C10 + HSV-1 36 h section series 1

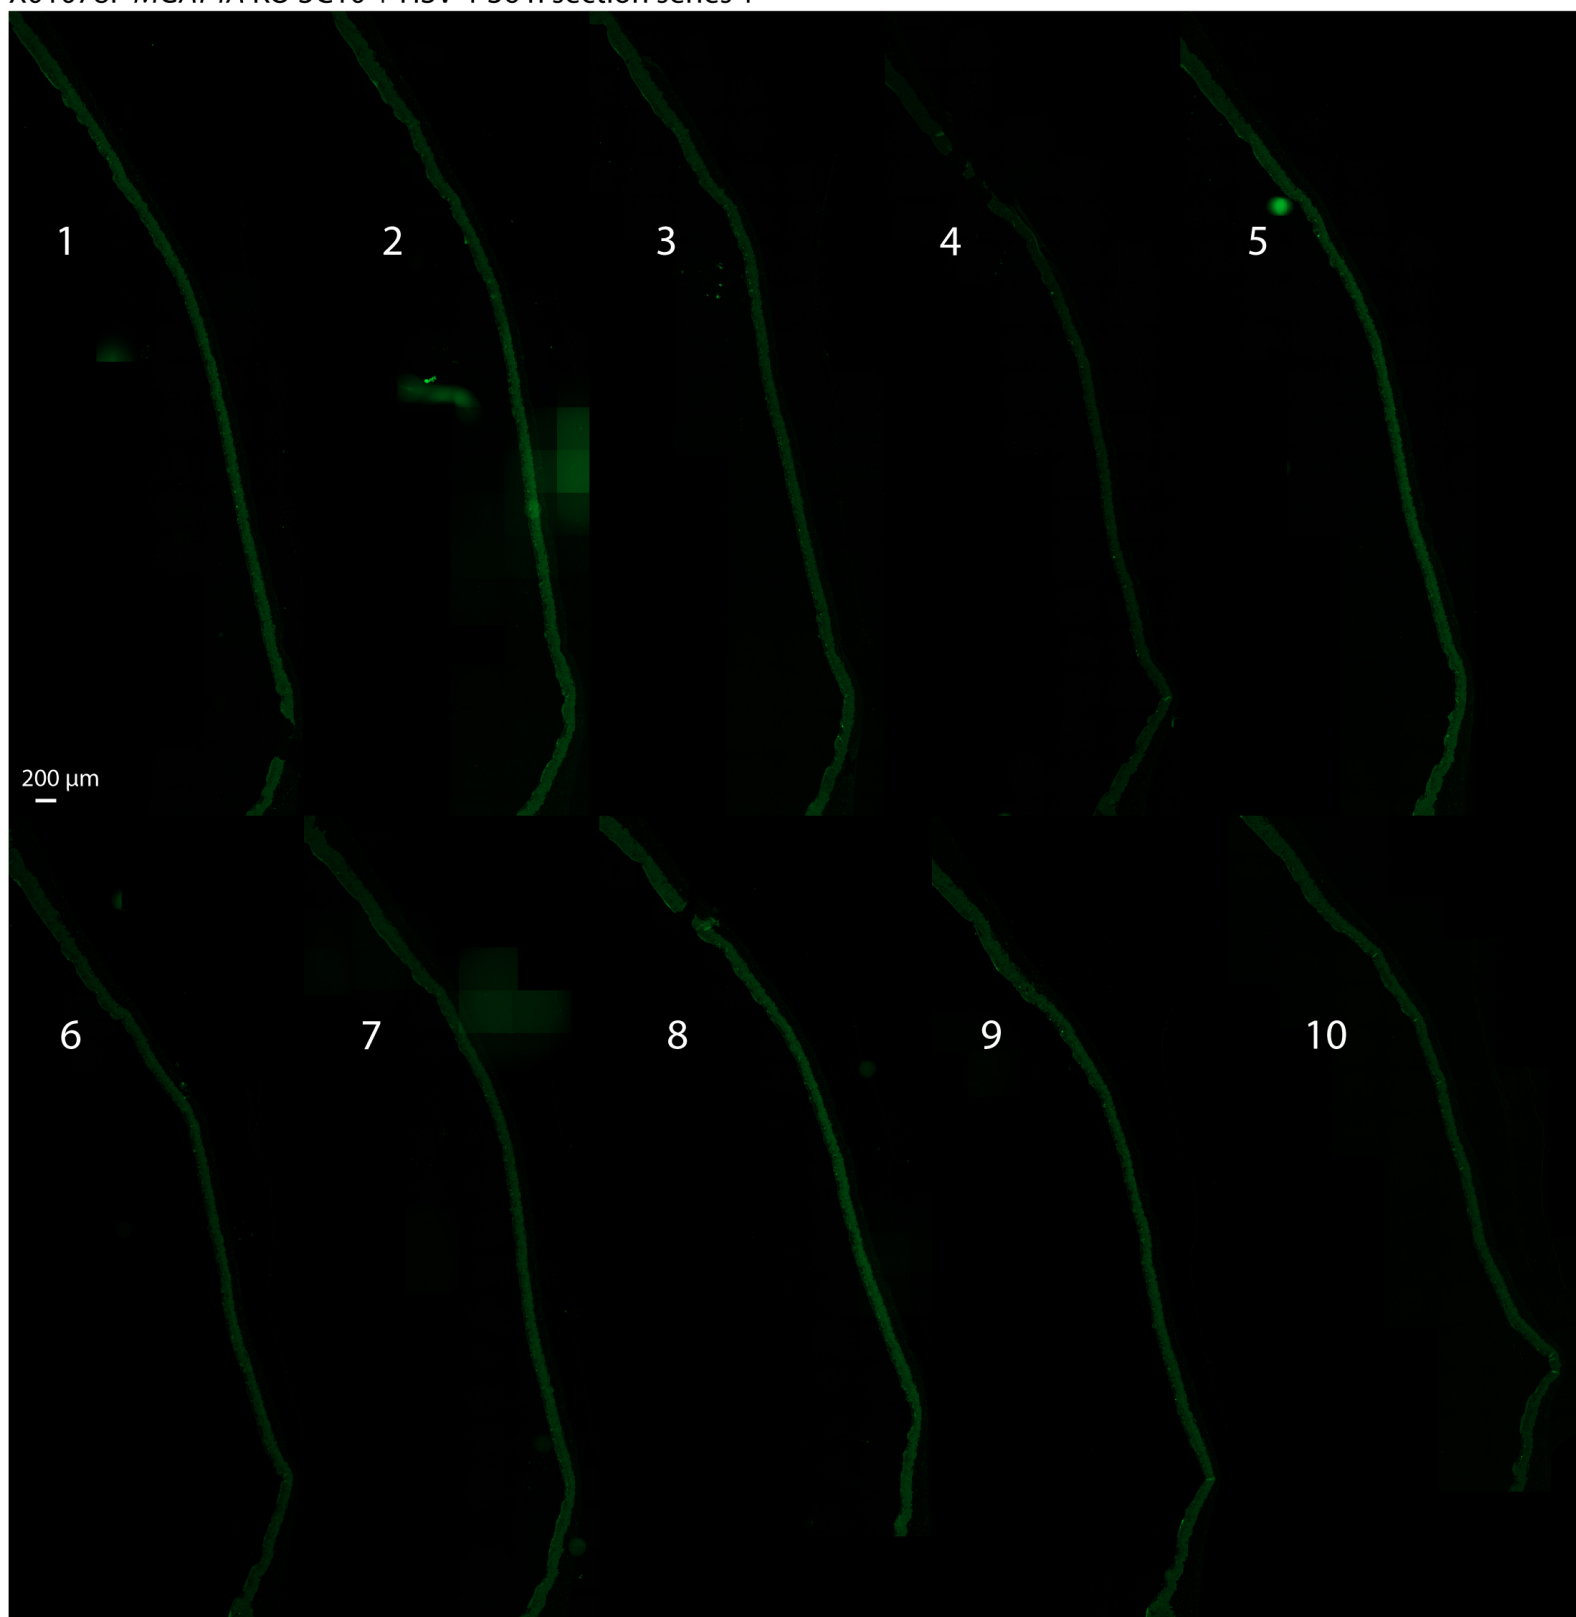

X01078P *MGAT4A* KO 3C10 + HSV-1 36 h section series 2

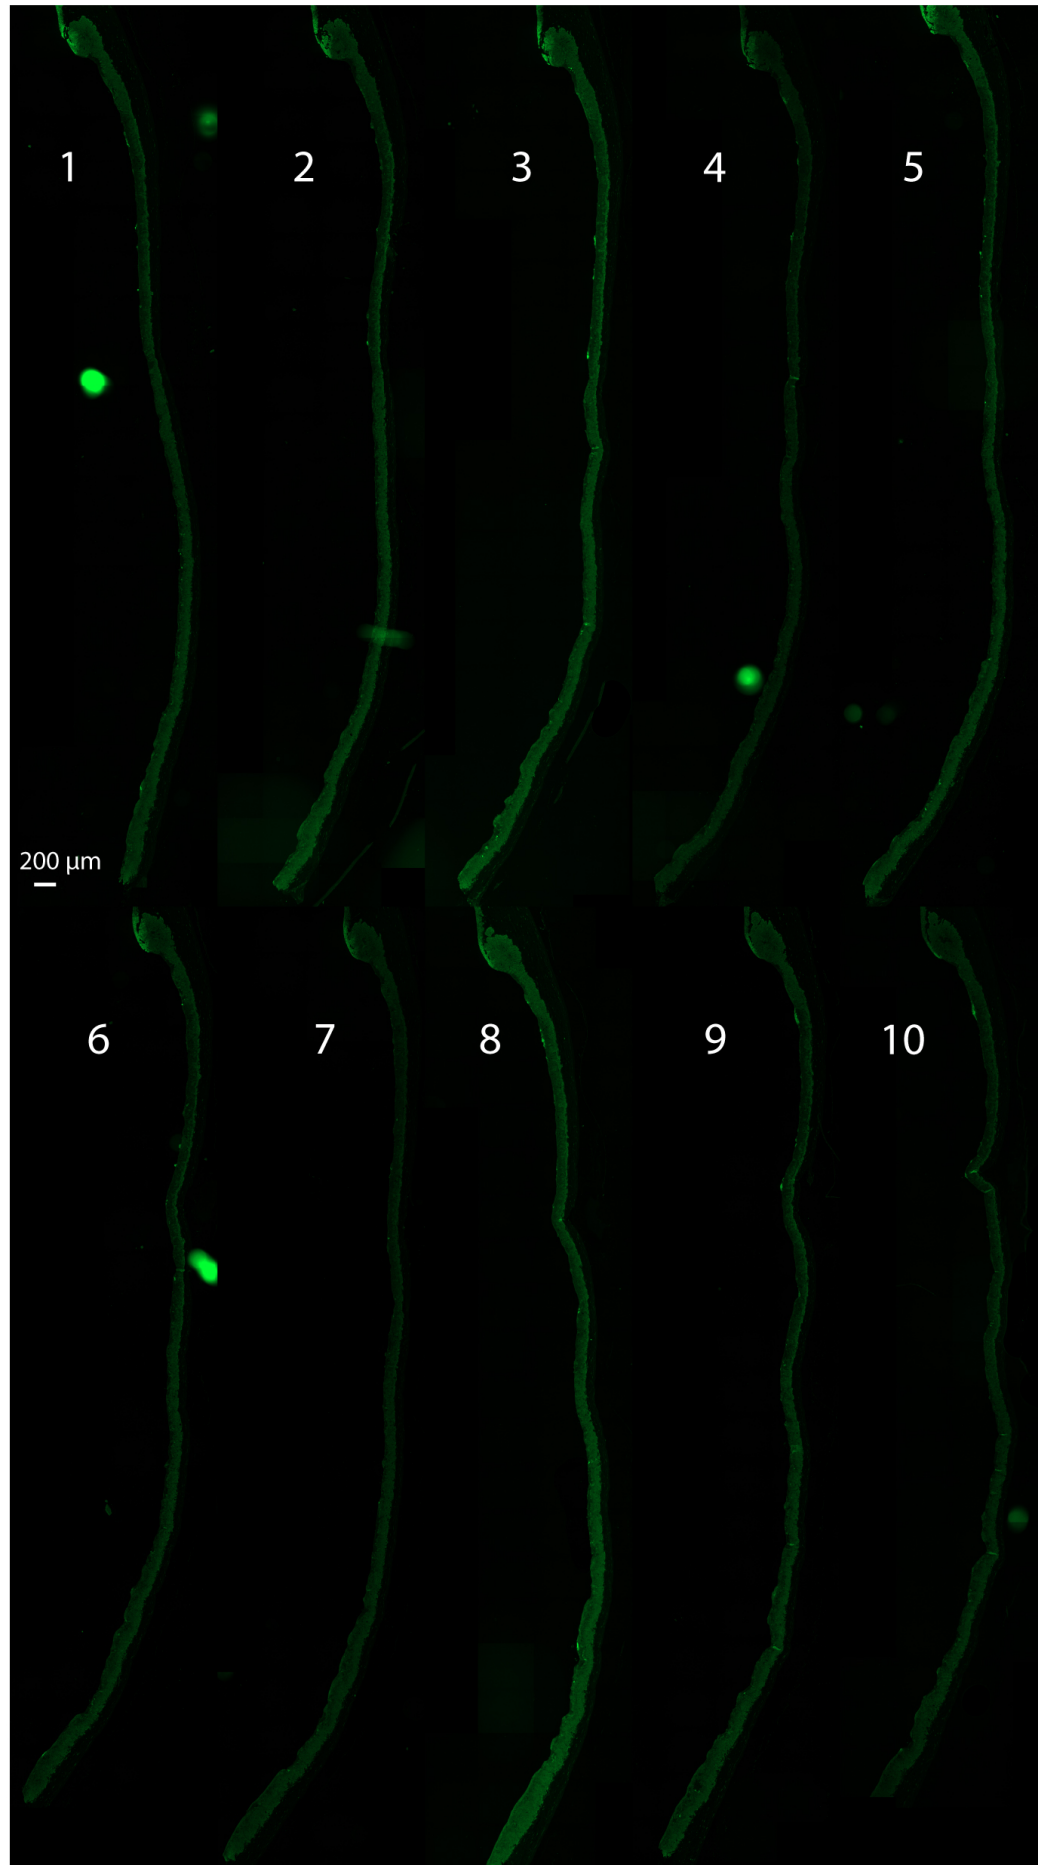



X01105L *MGAT4B* KO 3F8 + HSV-1 36 h section series 1

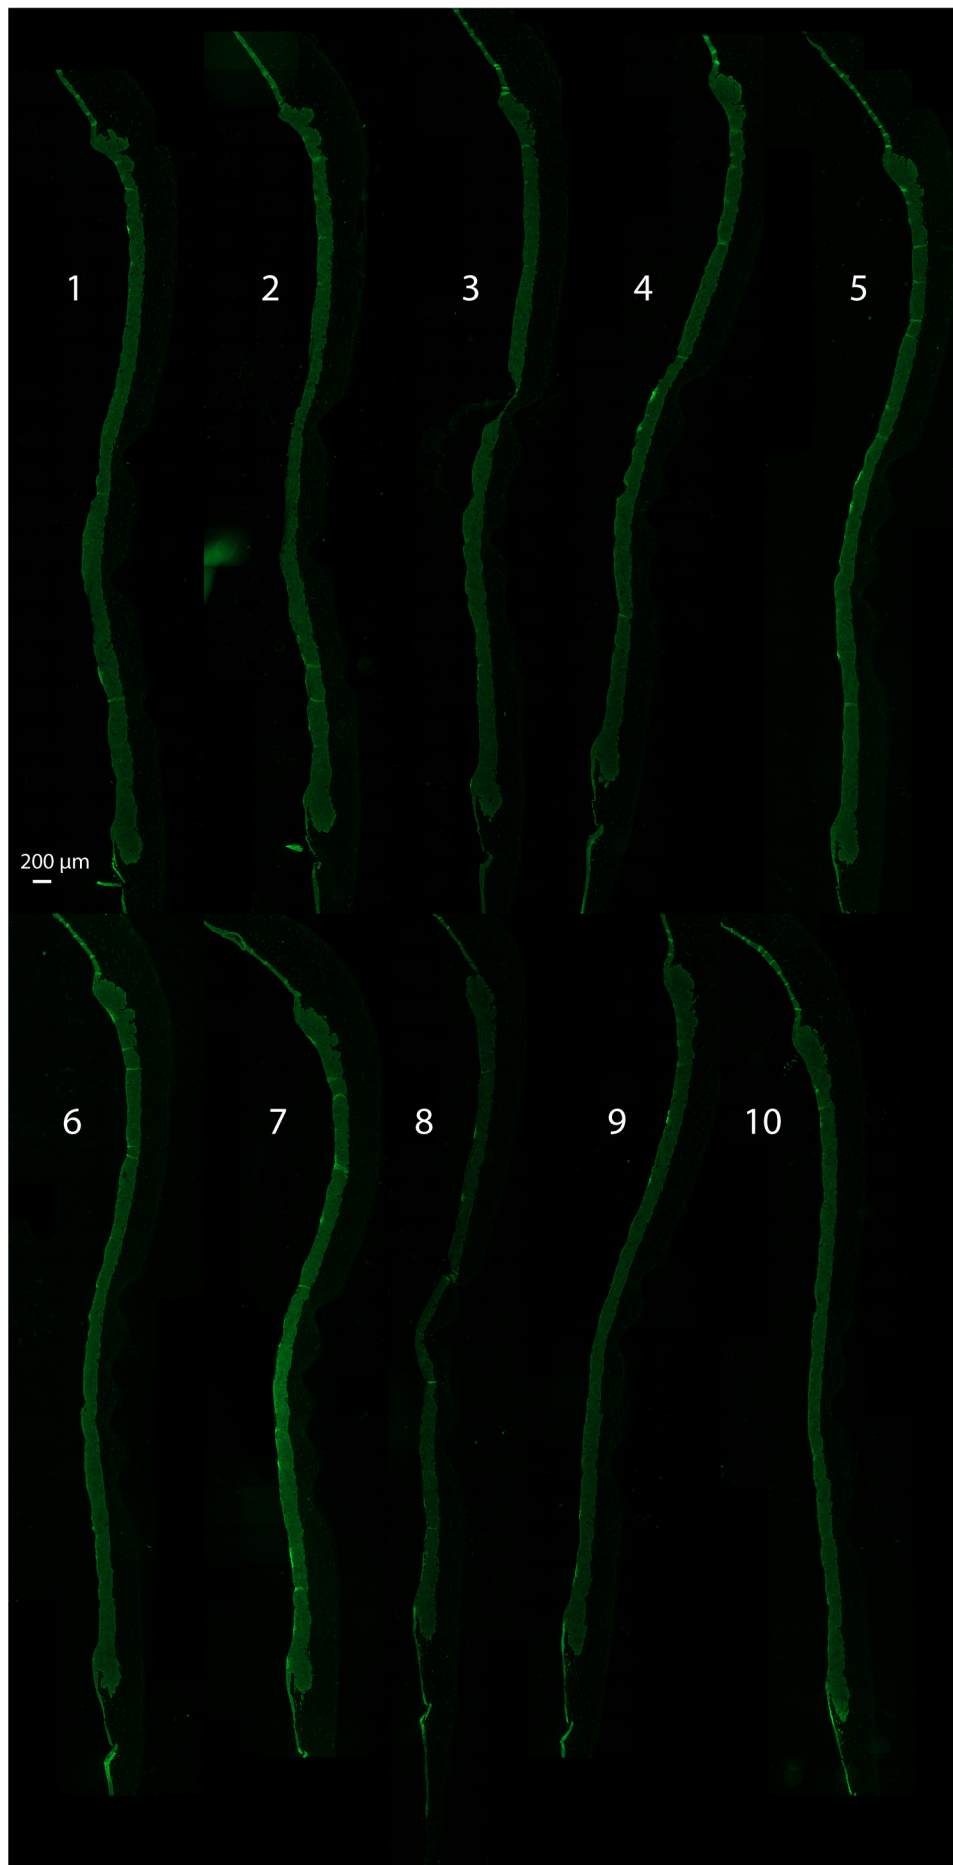

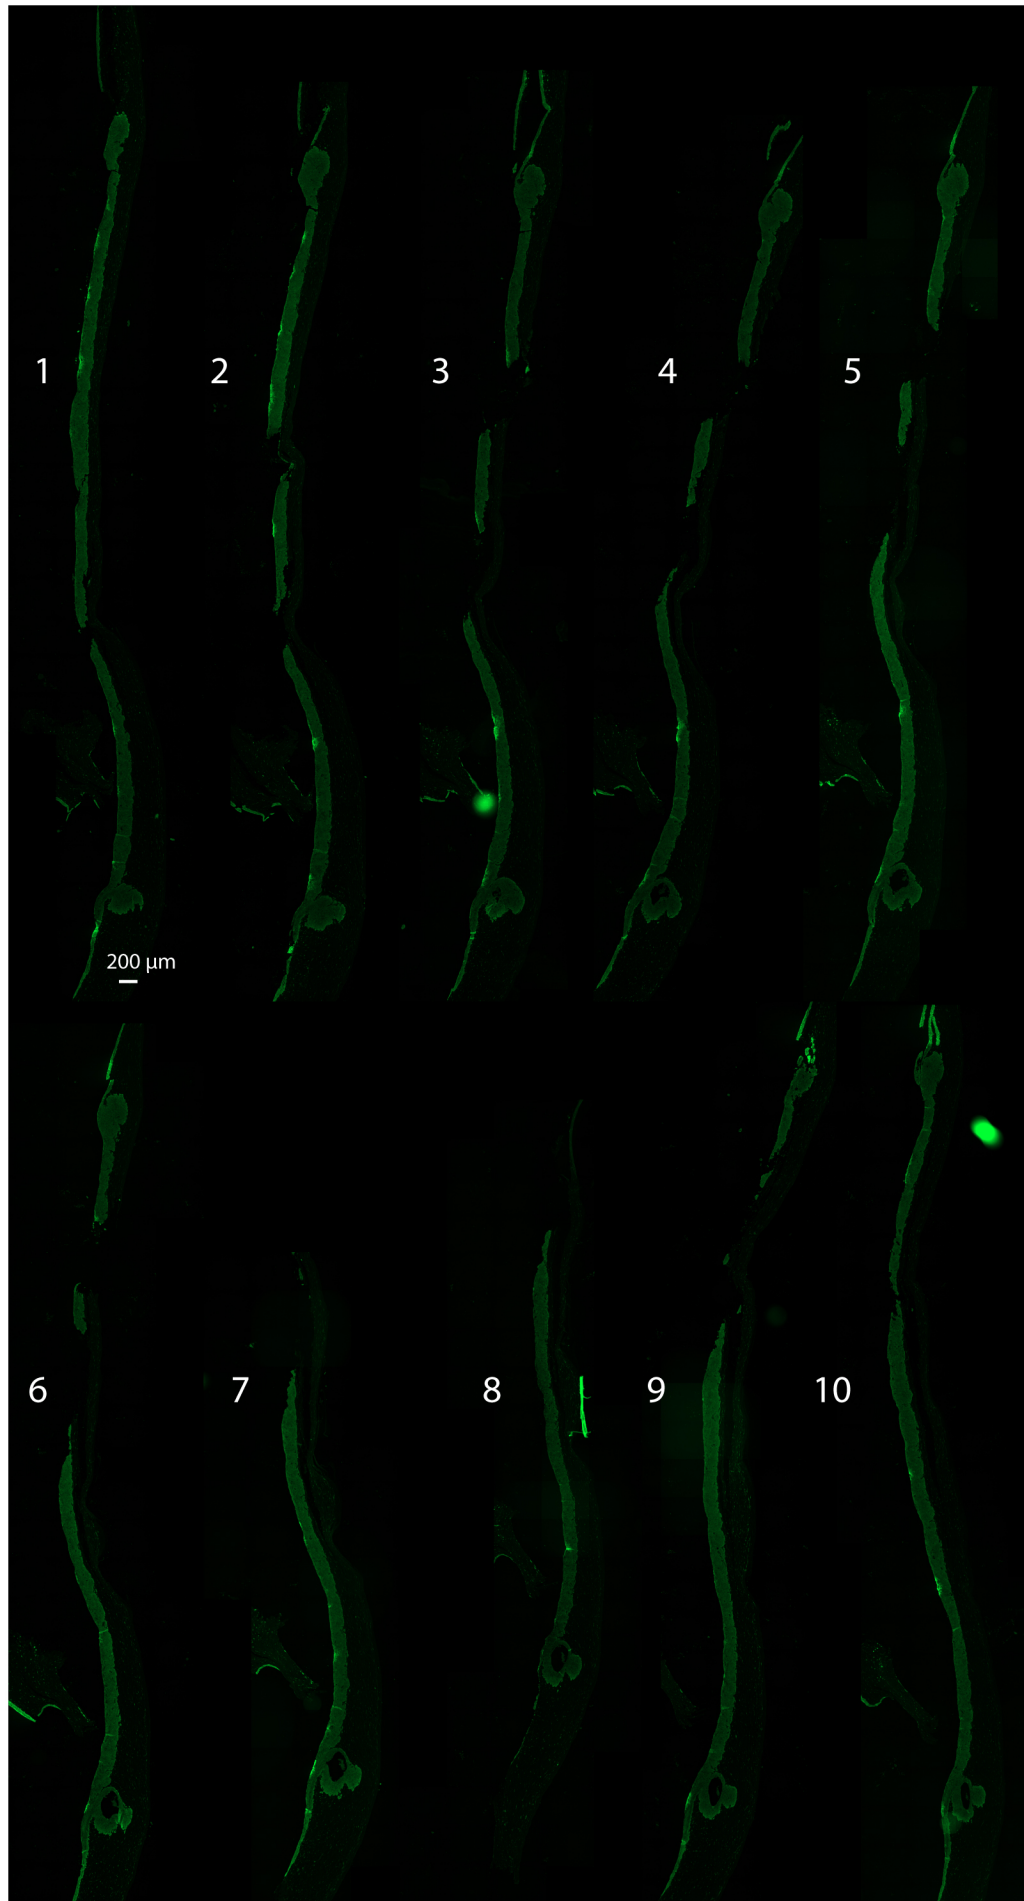



X01078Q\_MGAT5 KO 1F12 + HSV-1 36 h section series 1

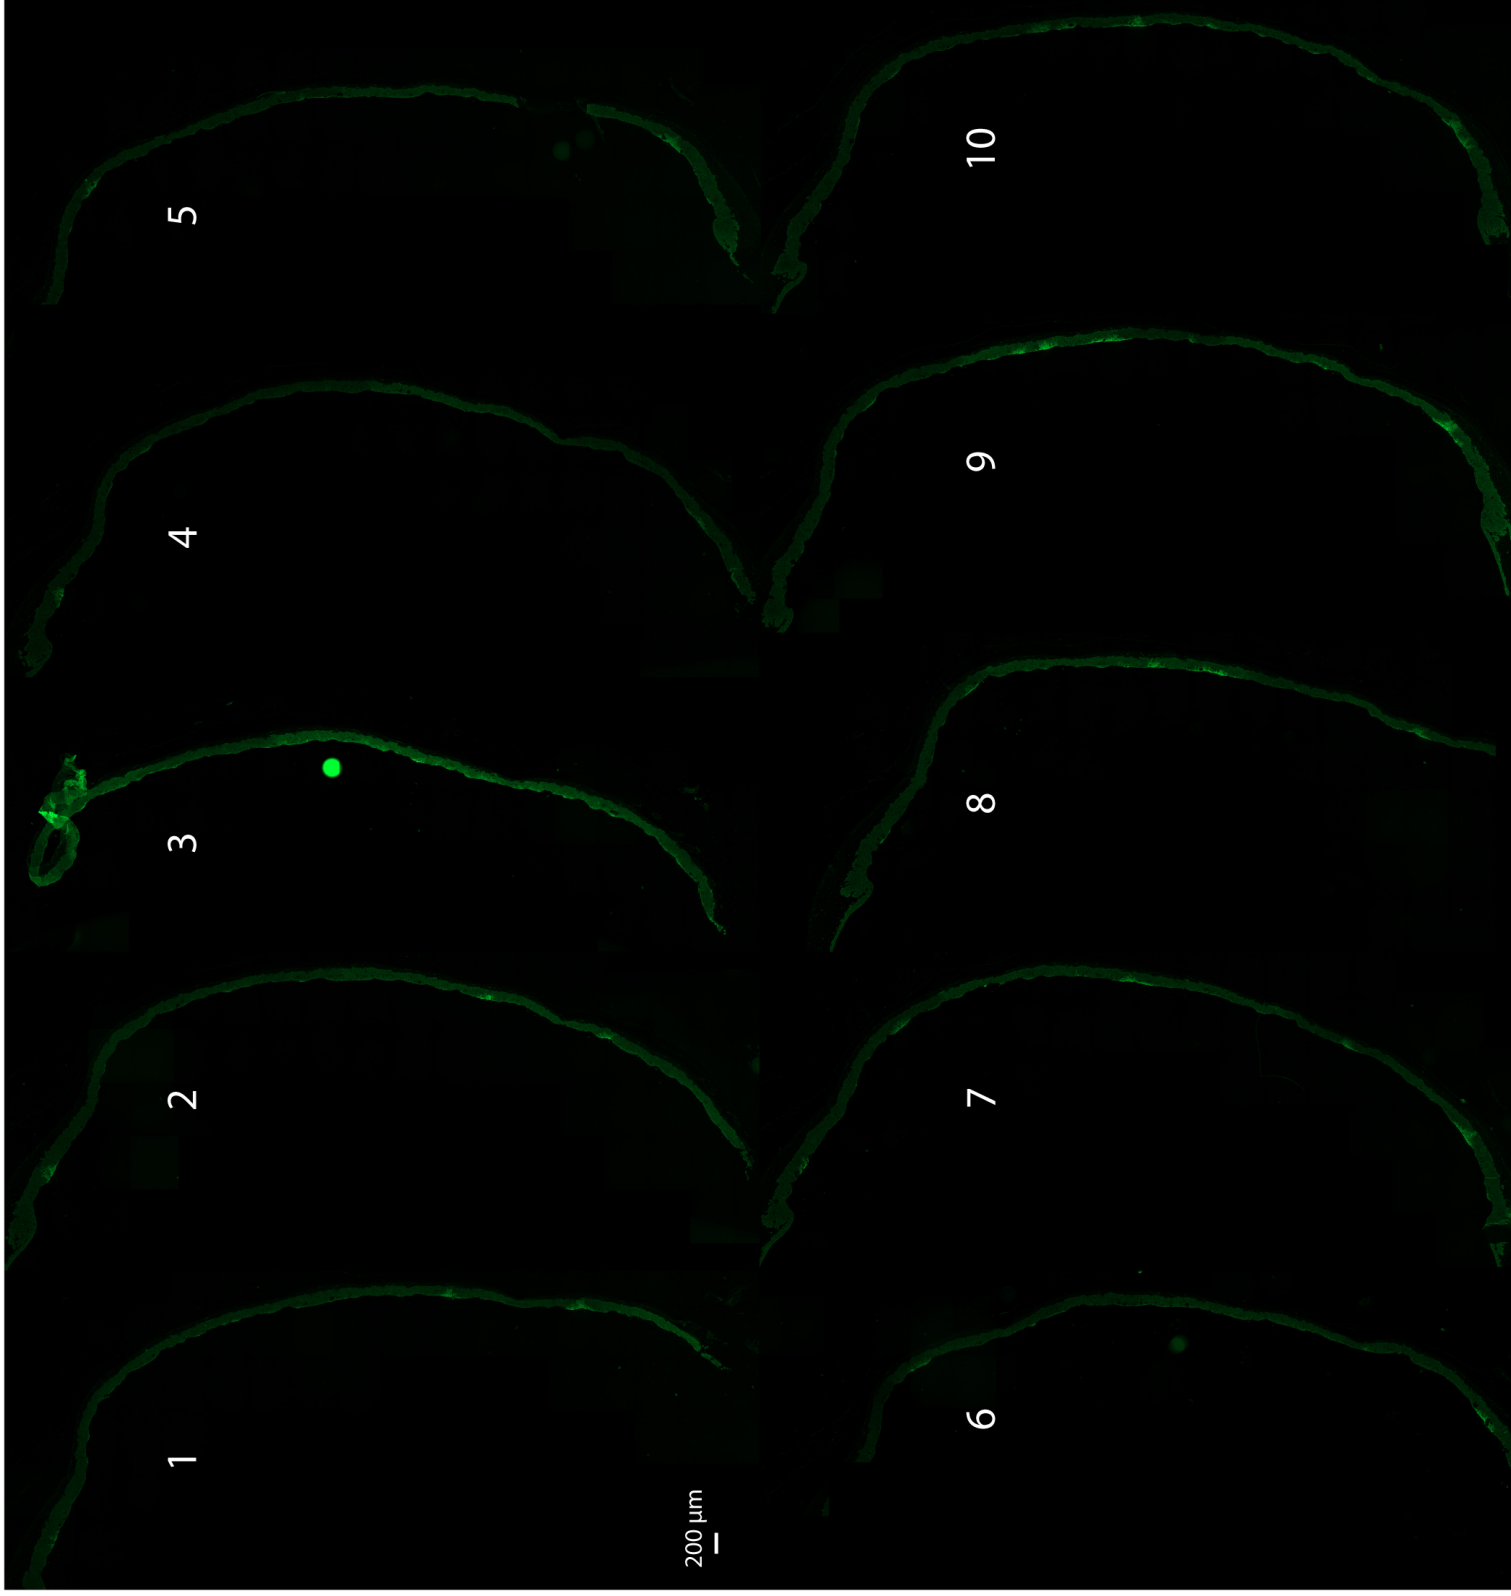

1

2

3

4

5

6

7

8

9

10

200 μm

X01078Q *MGAT5* KO 1F12 + HSV-1 36 h section series 2

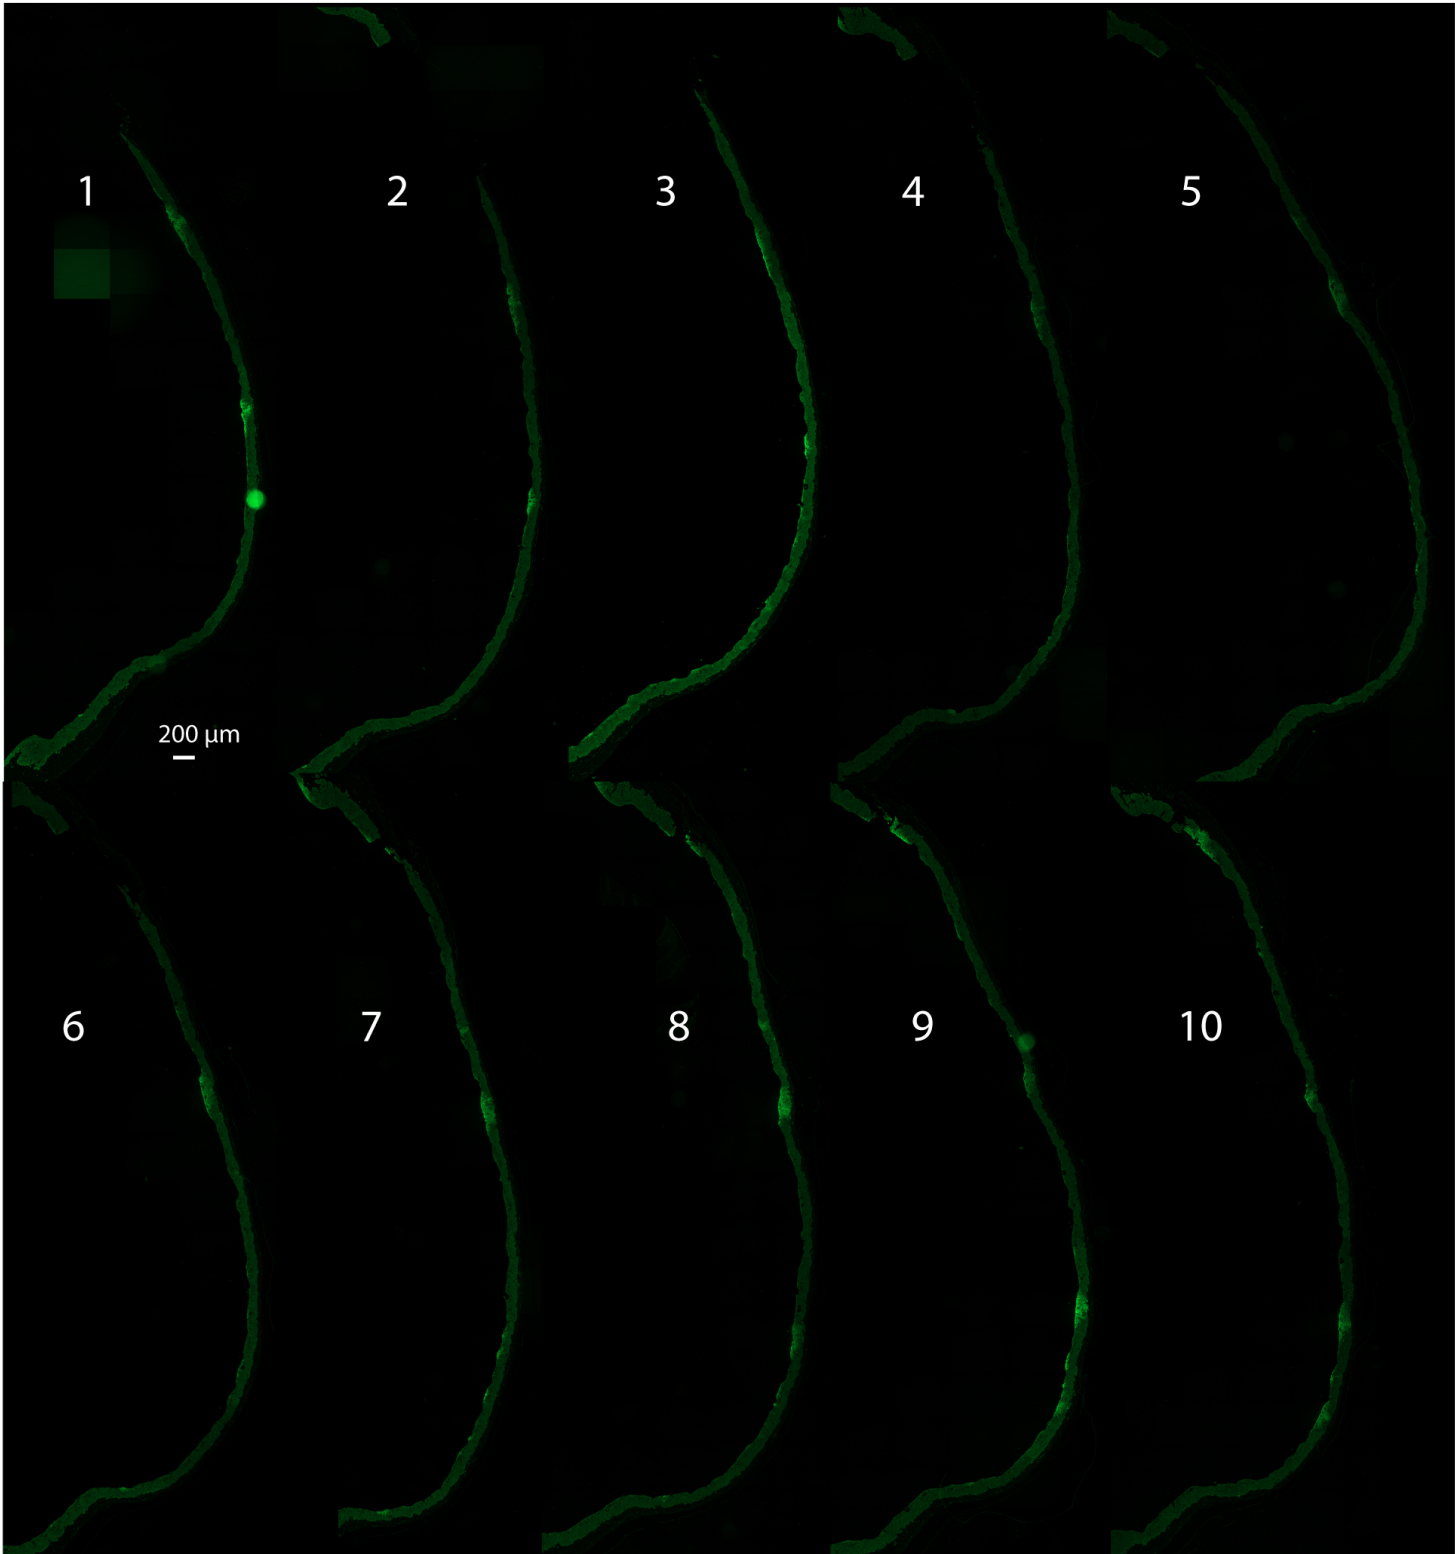

X01105R *MGAT5+4B* KO 2B5 + HSV-1 36 h section series 1

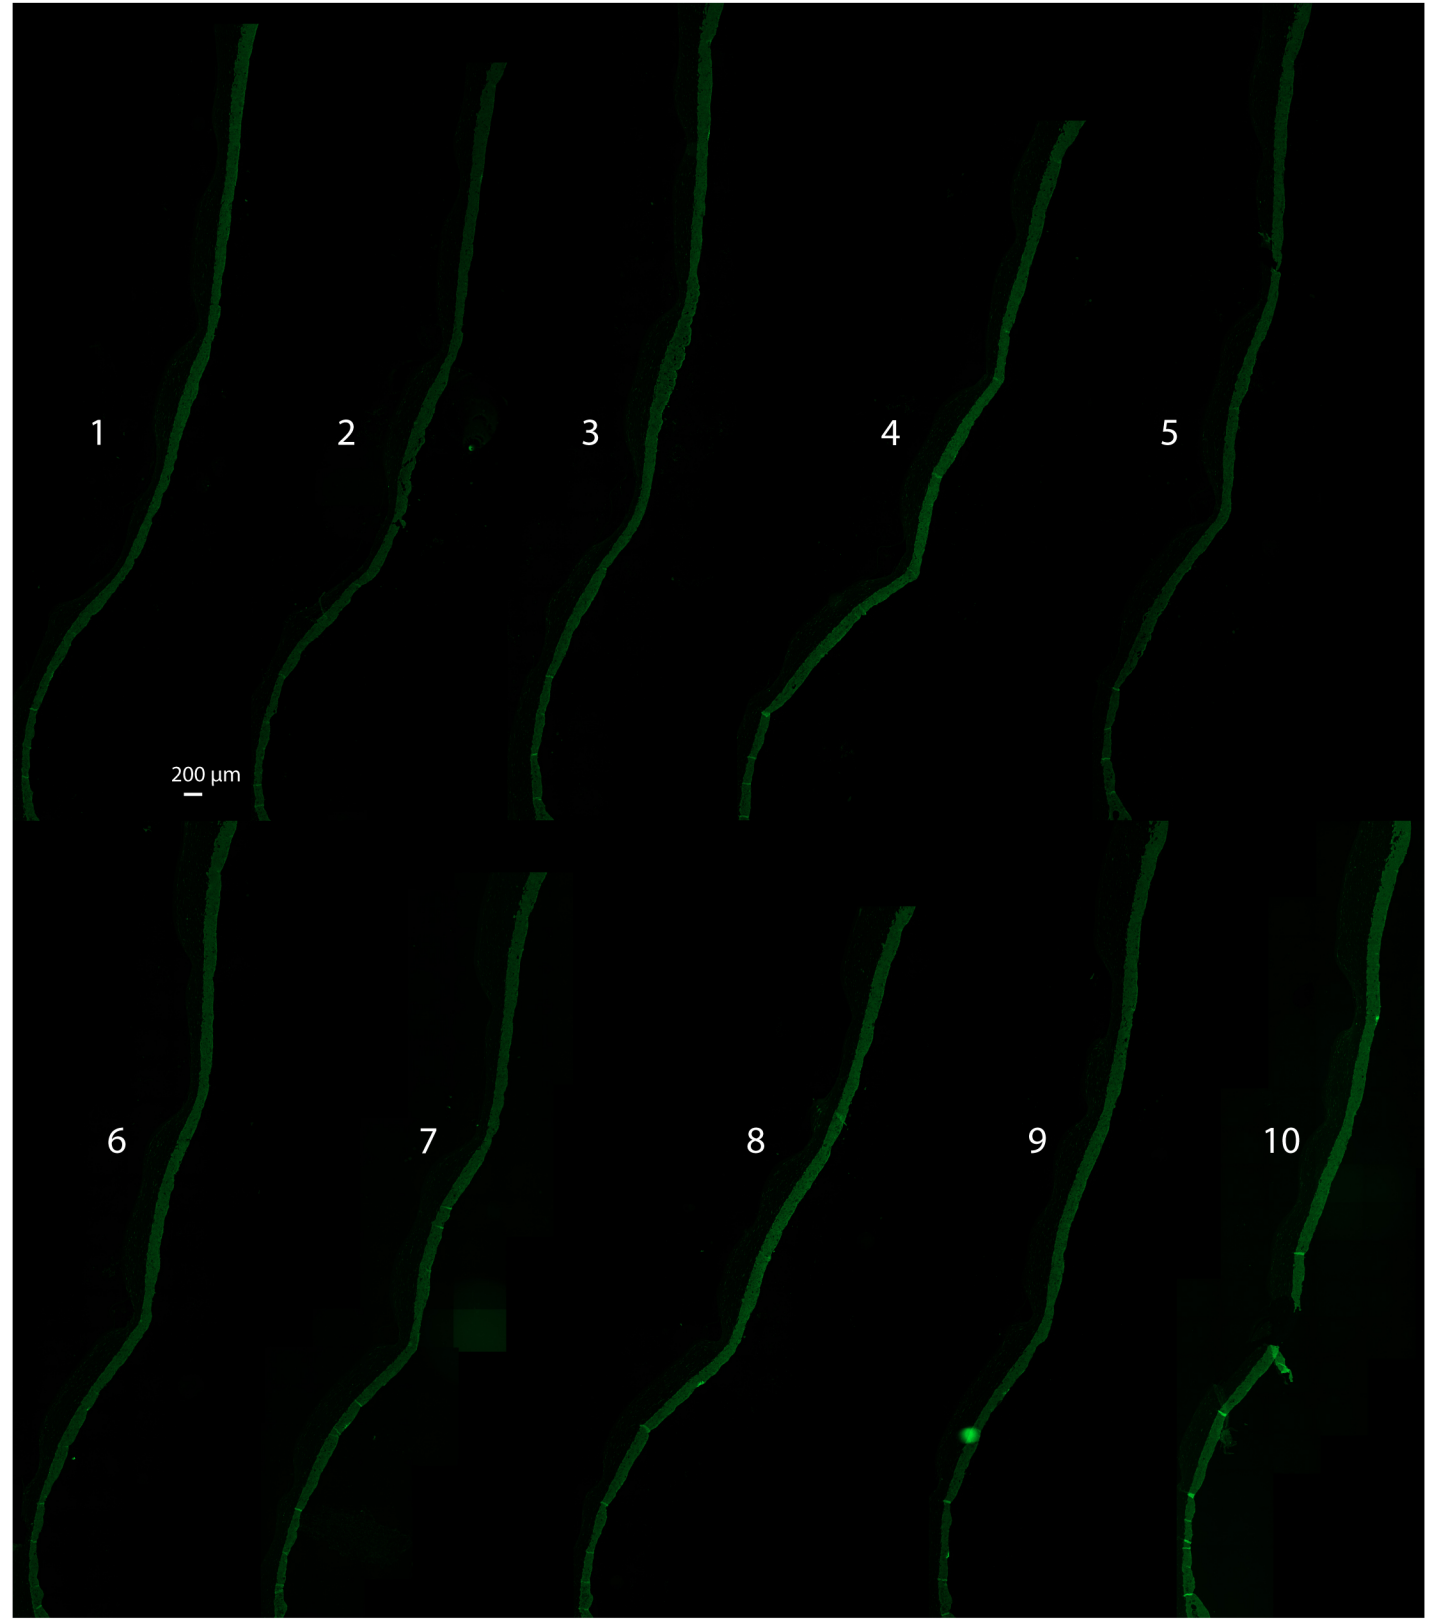

X01105R *MGAT5+4B* KO 2B5 + HSV-1 36 h section series 2

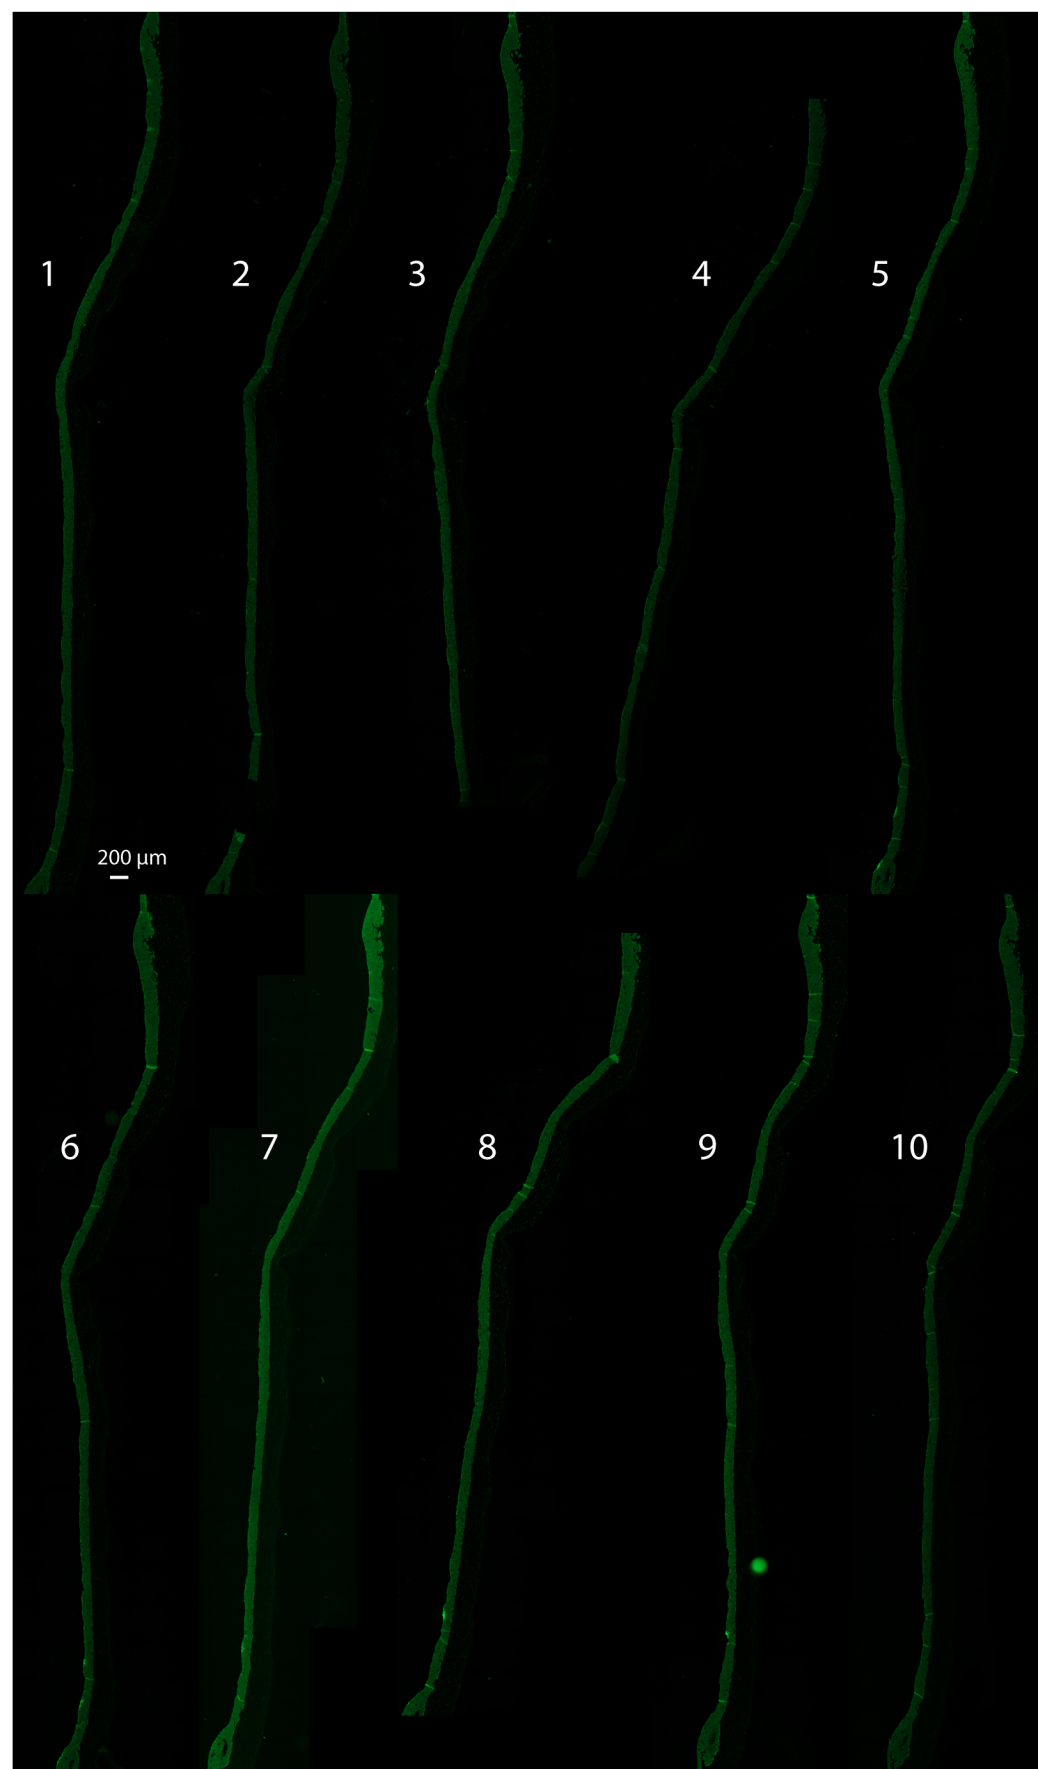

X01078N *C1GALT1C1* KO D5 + HSV-1 36 h section series 1

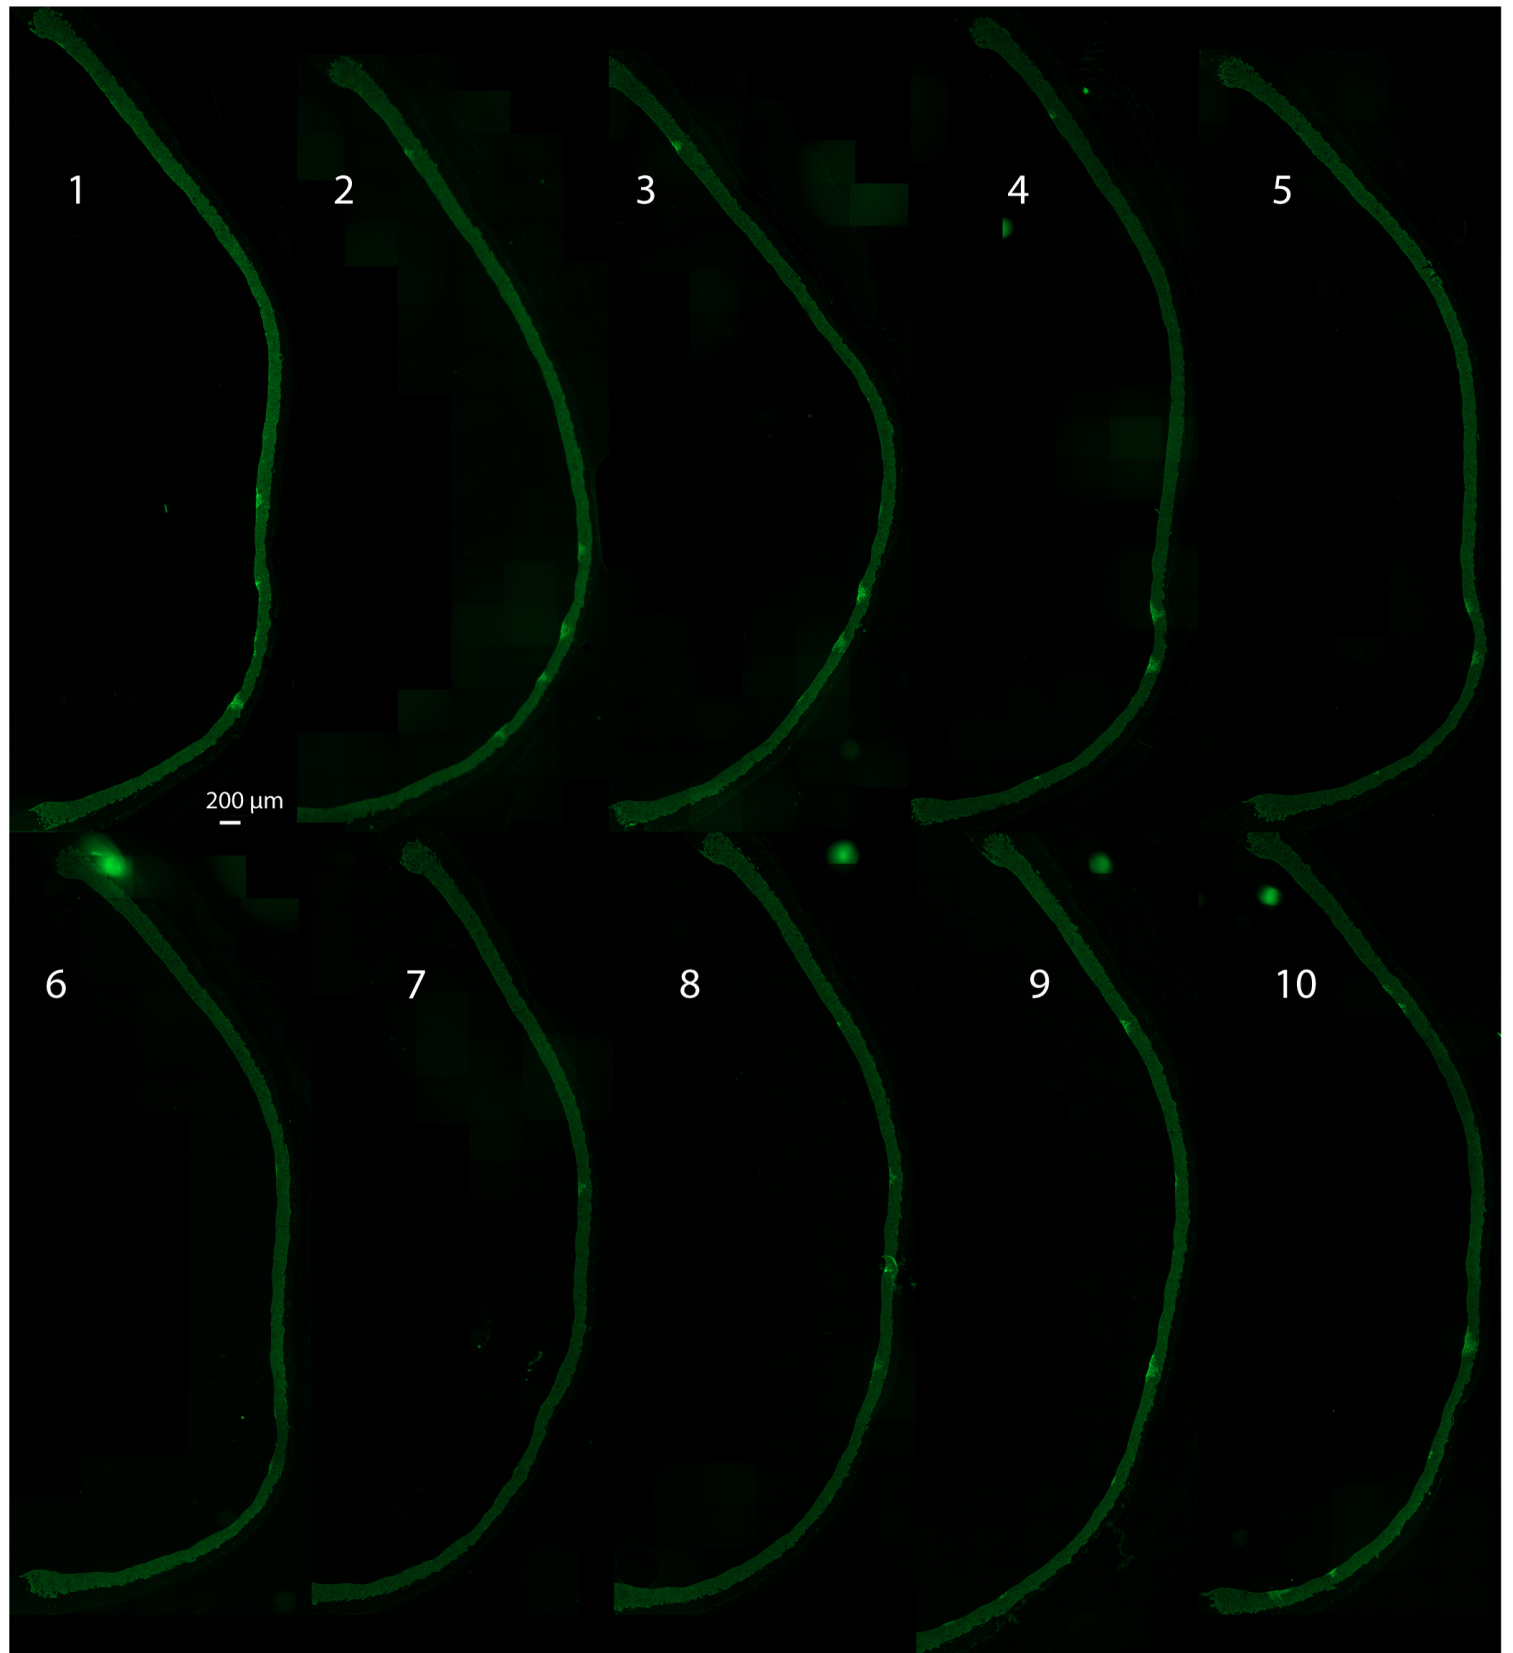



X01078N C1GALTI1C1 KO D5 + HSV-1 36 h section series 2

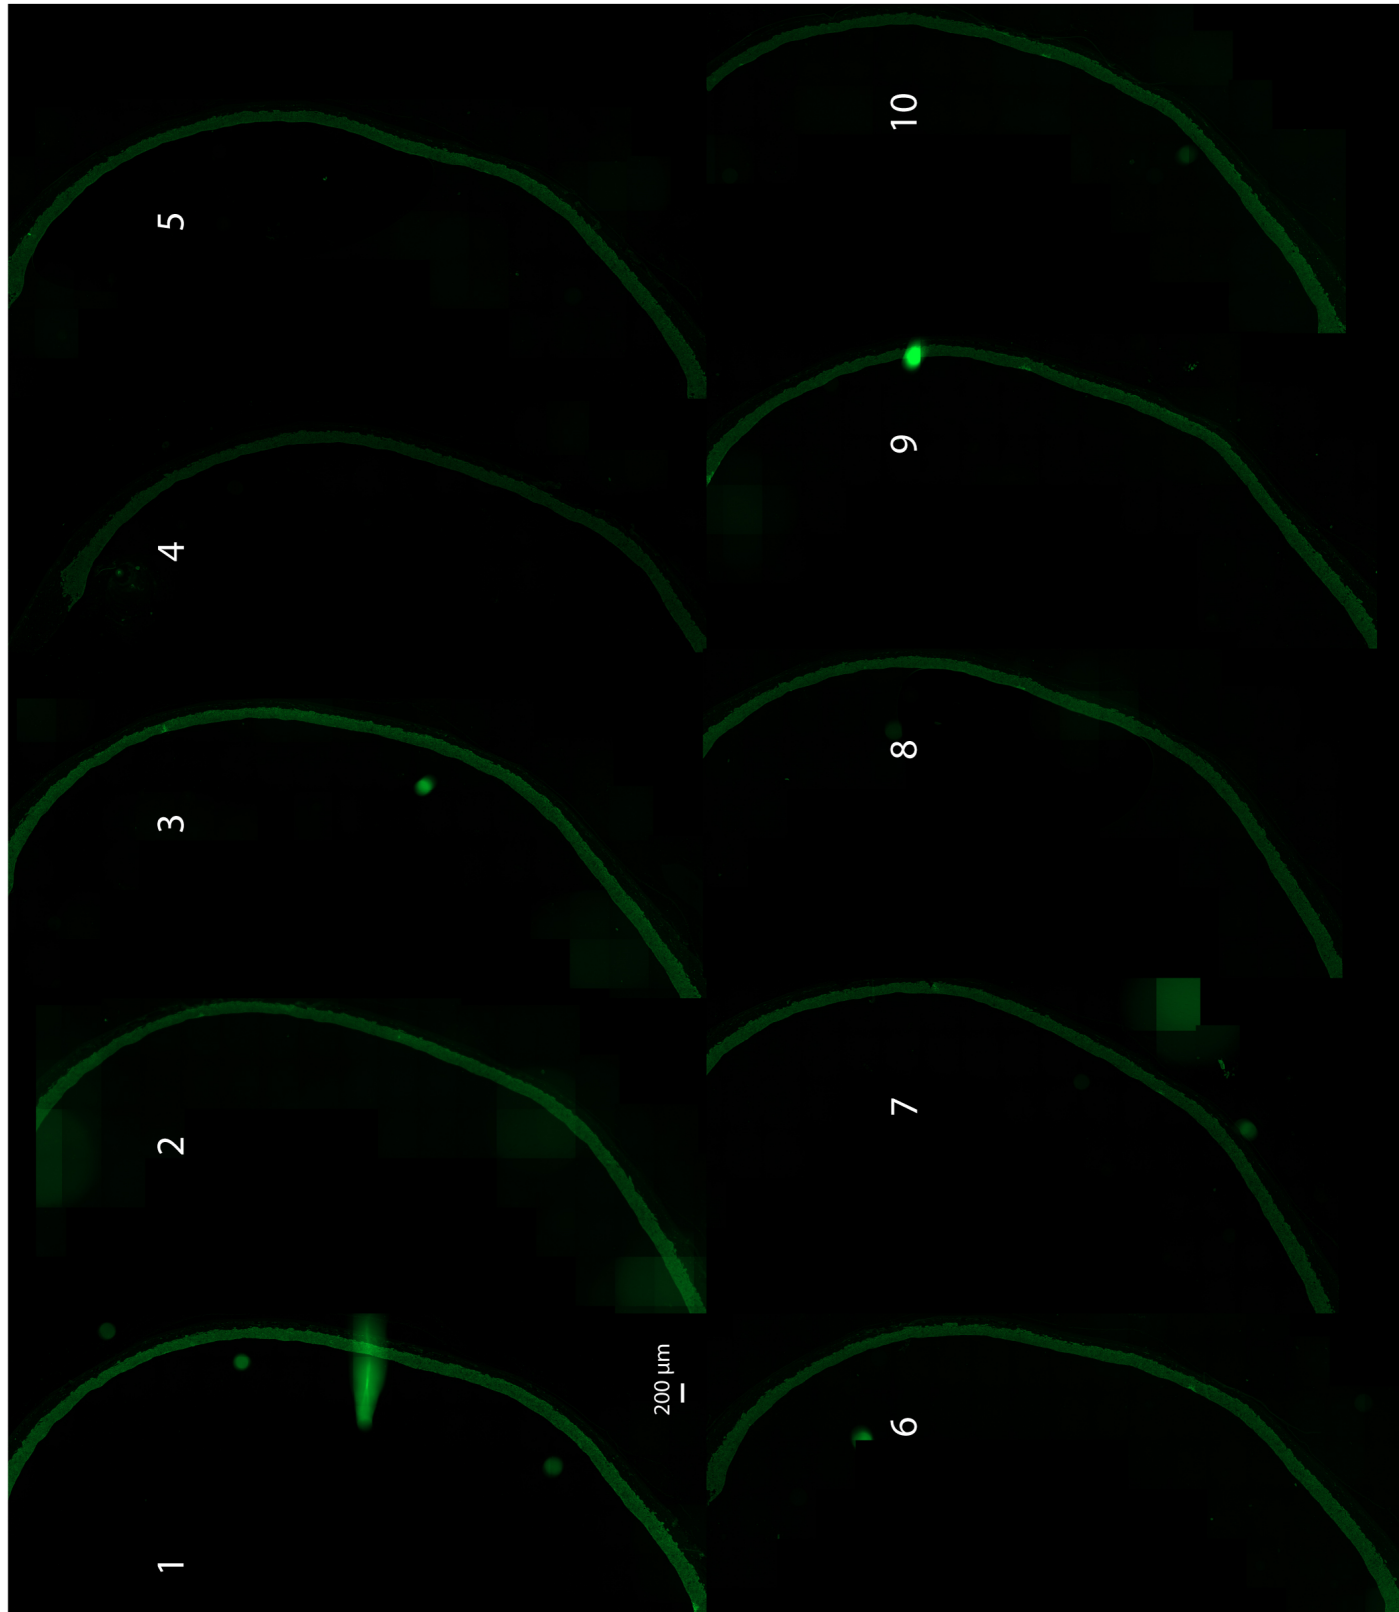

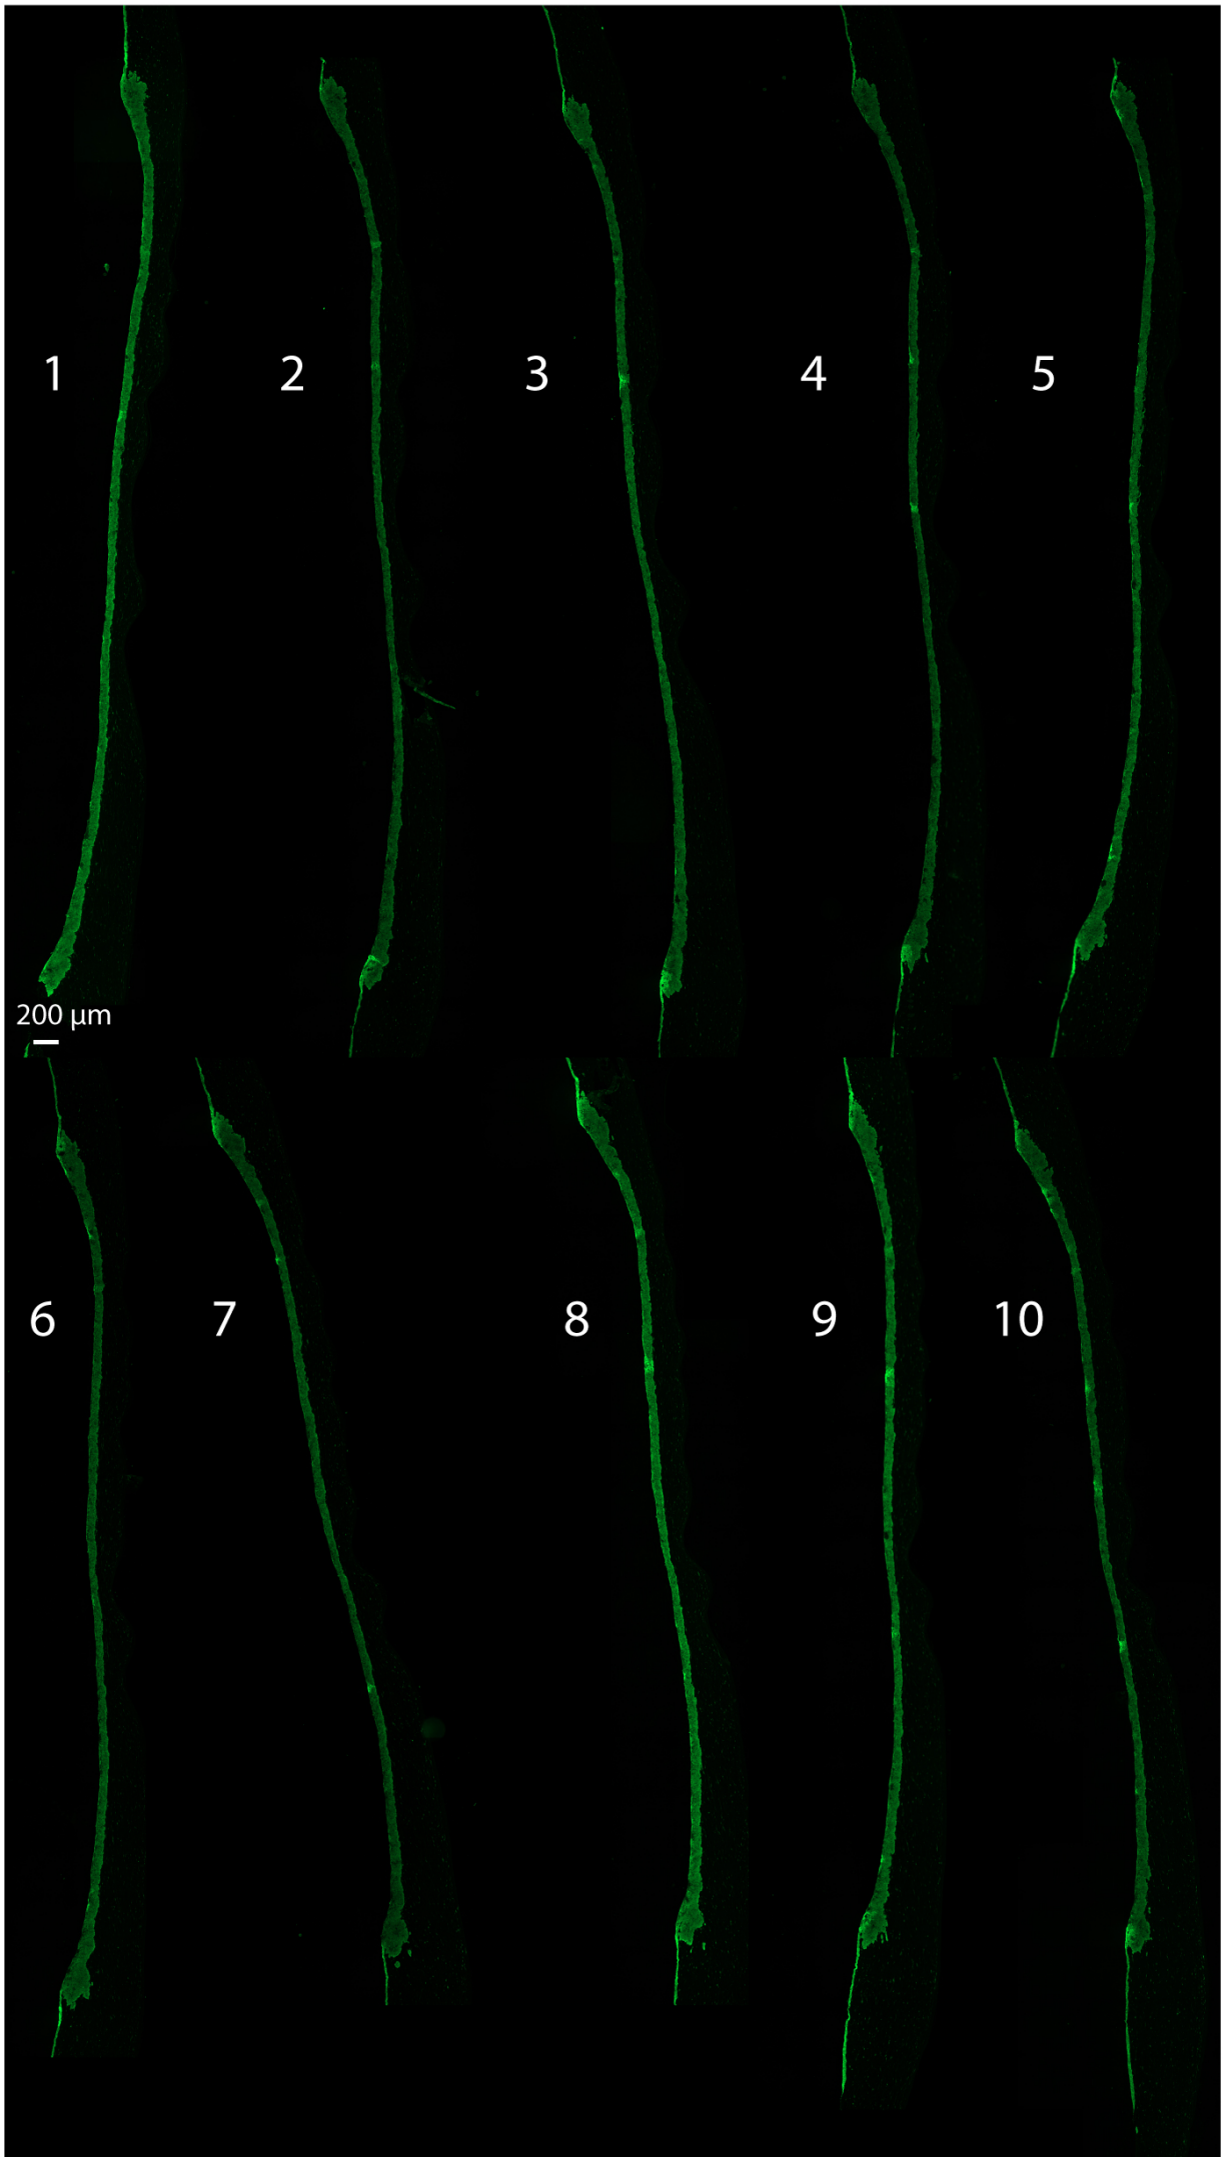

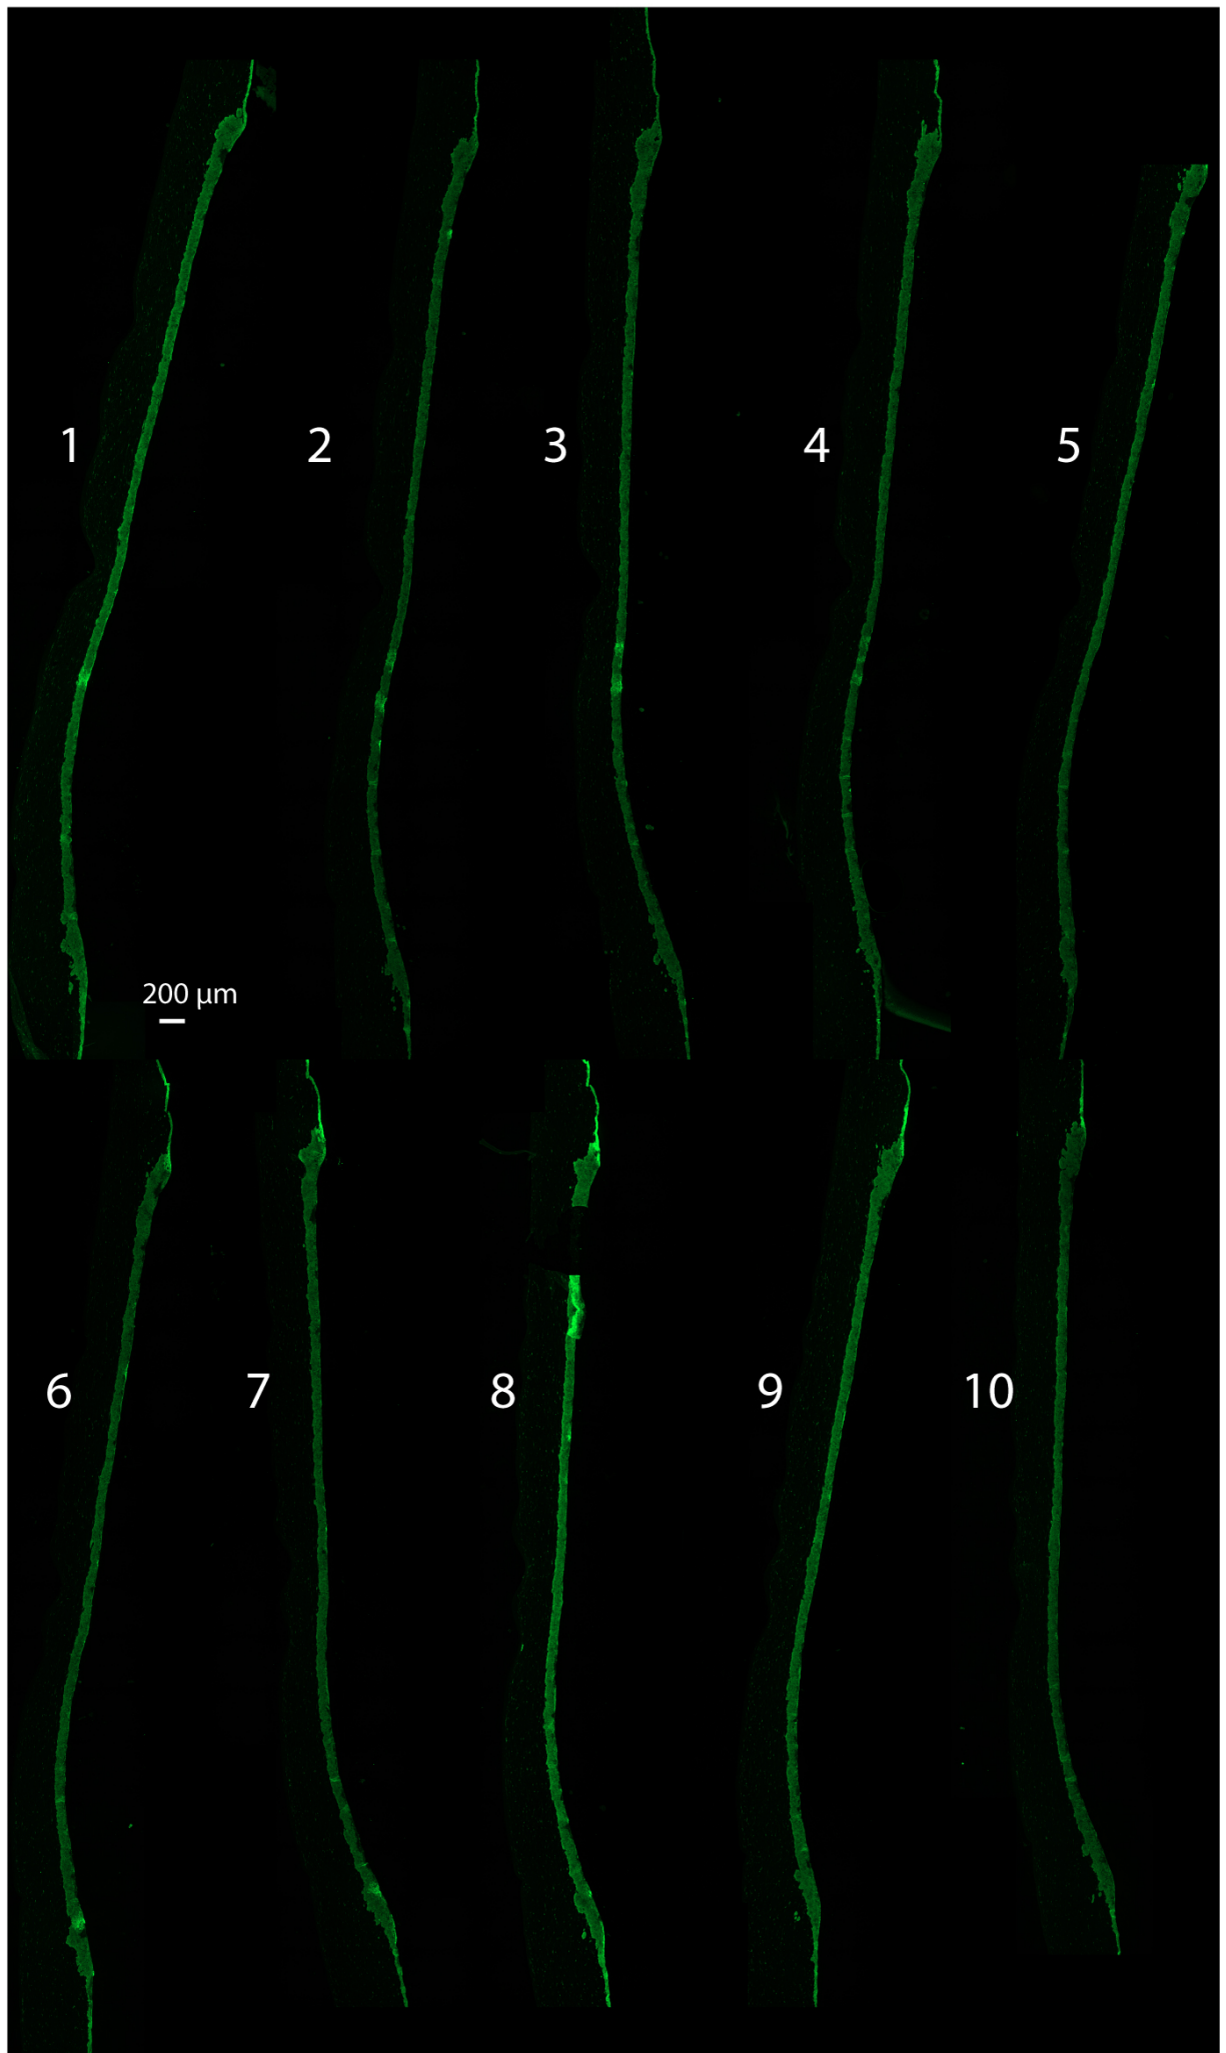



X01105Q GCNT1 KO 2E7 + HSV-1 36 h section series 1

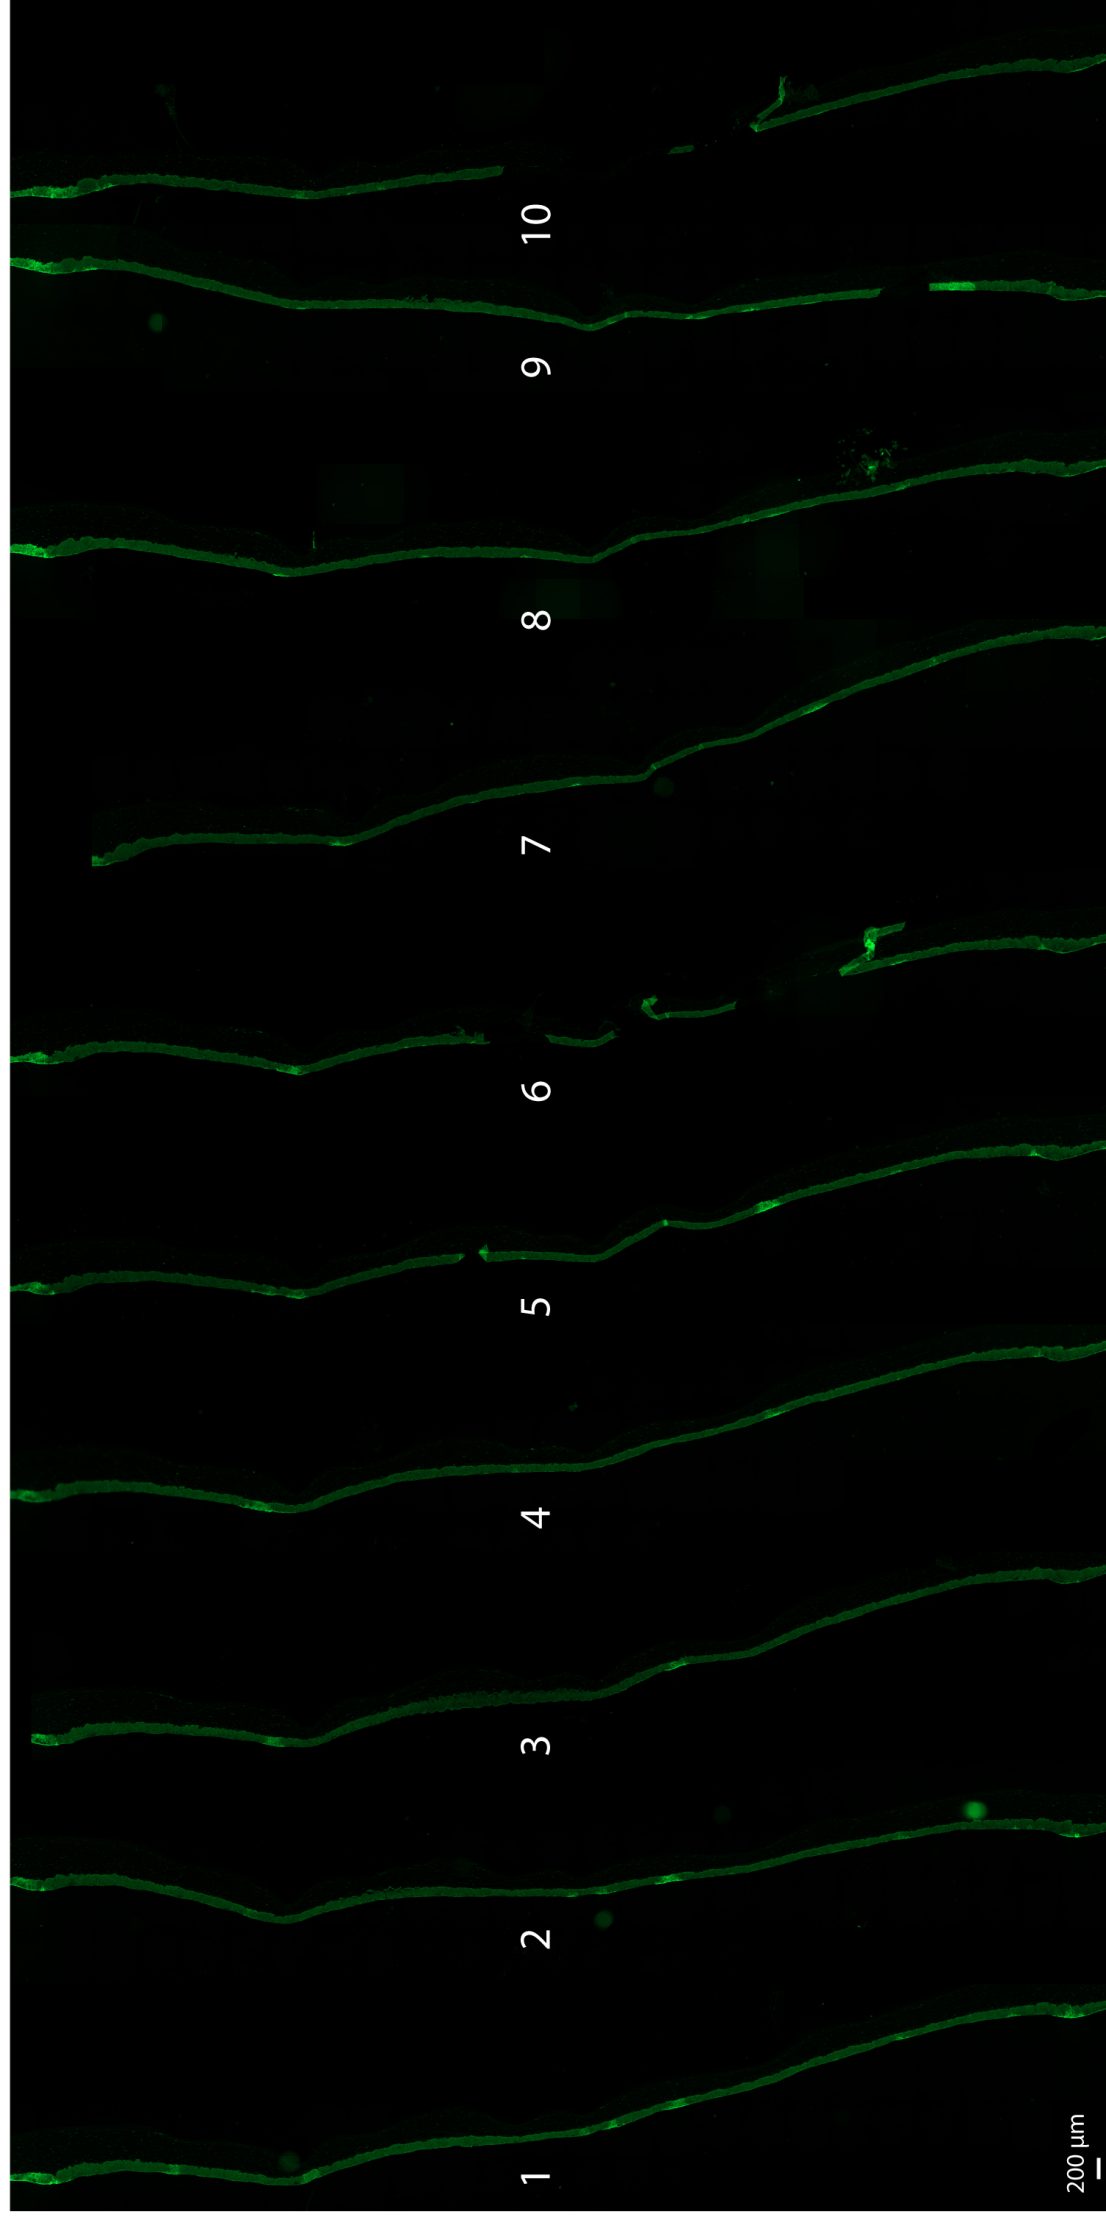

X01105Q GCNT1 KO 2E7 + HSV-1 36 h section series 2

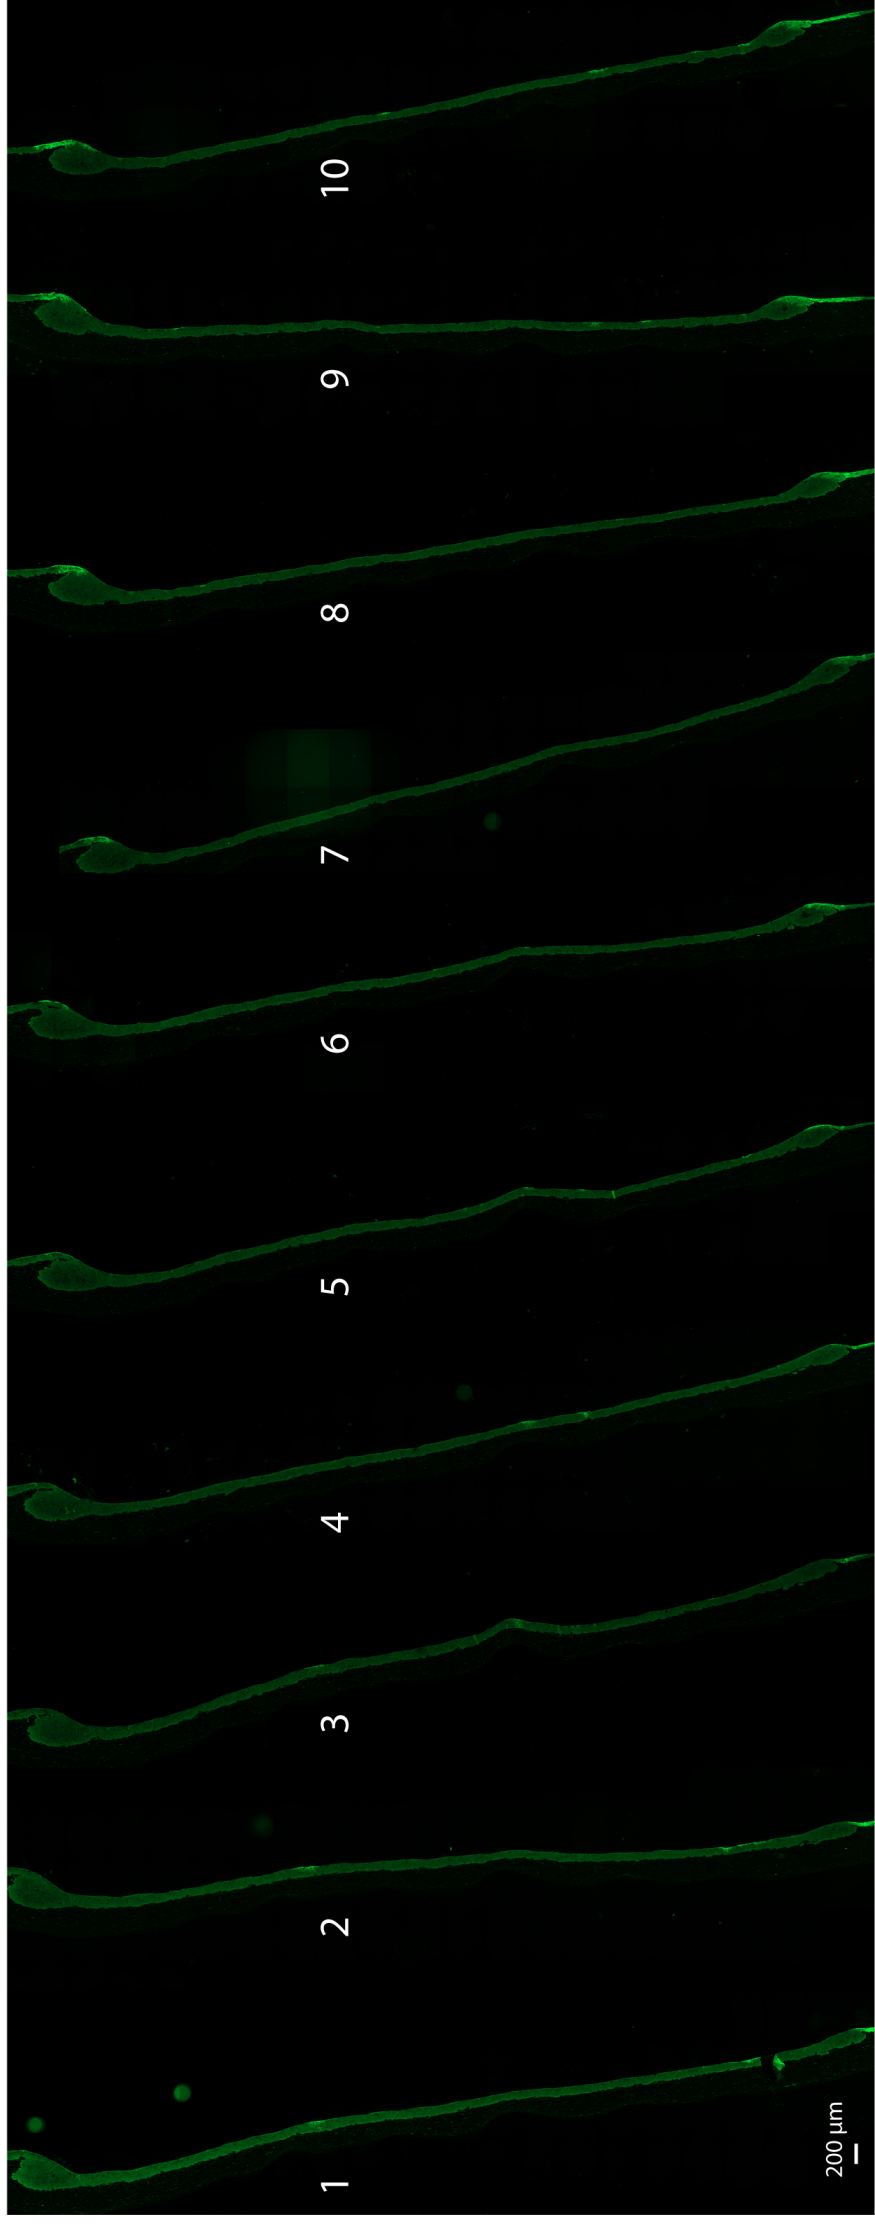

200 μm

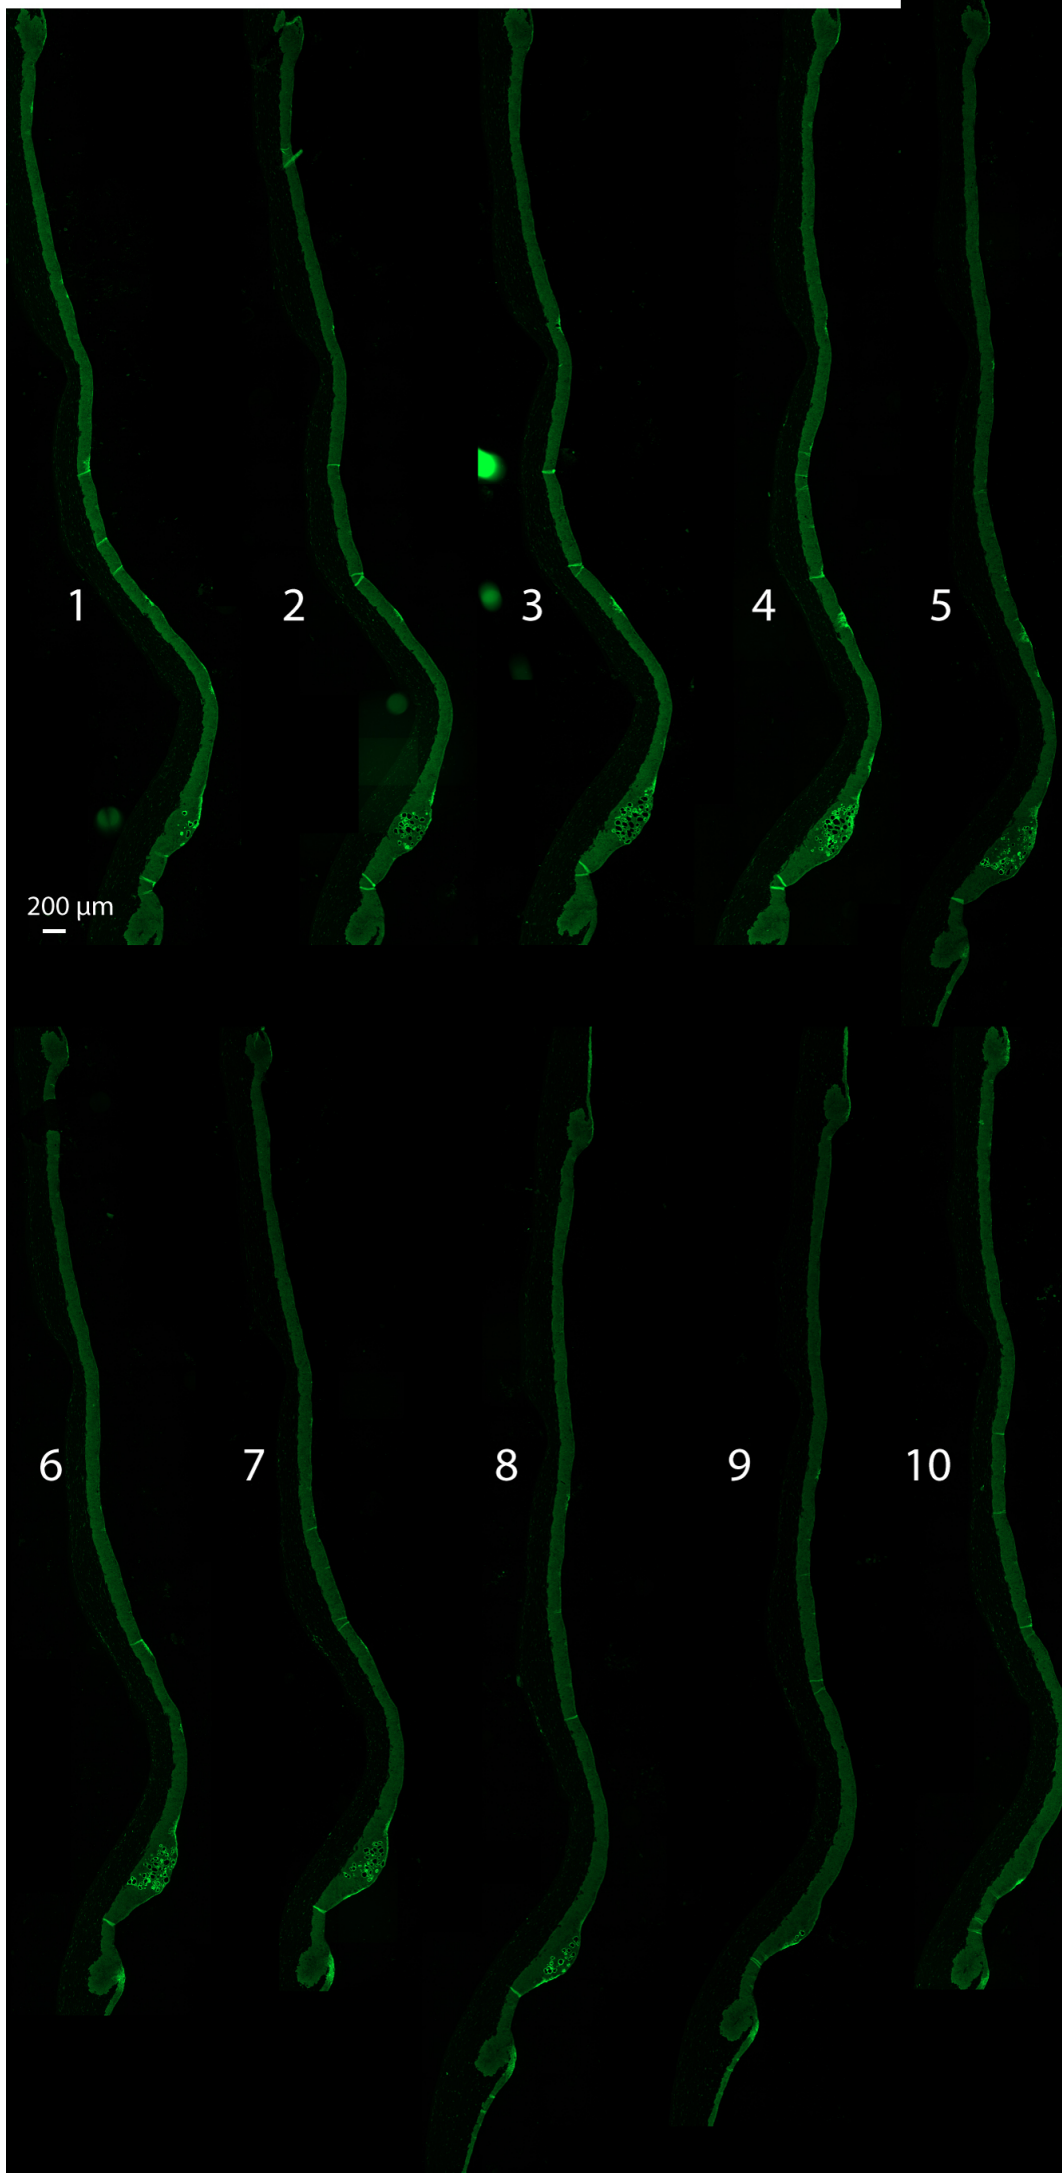

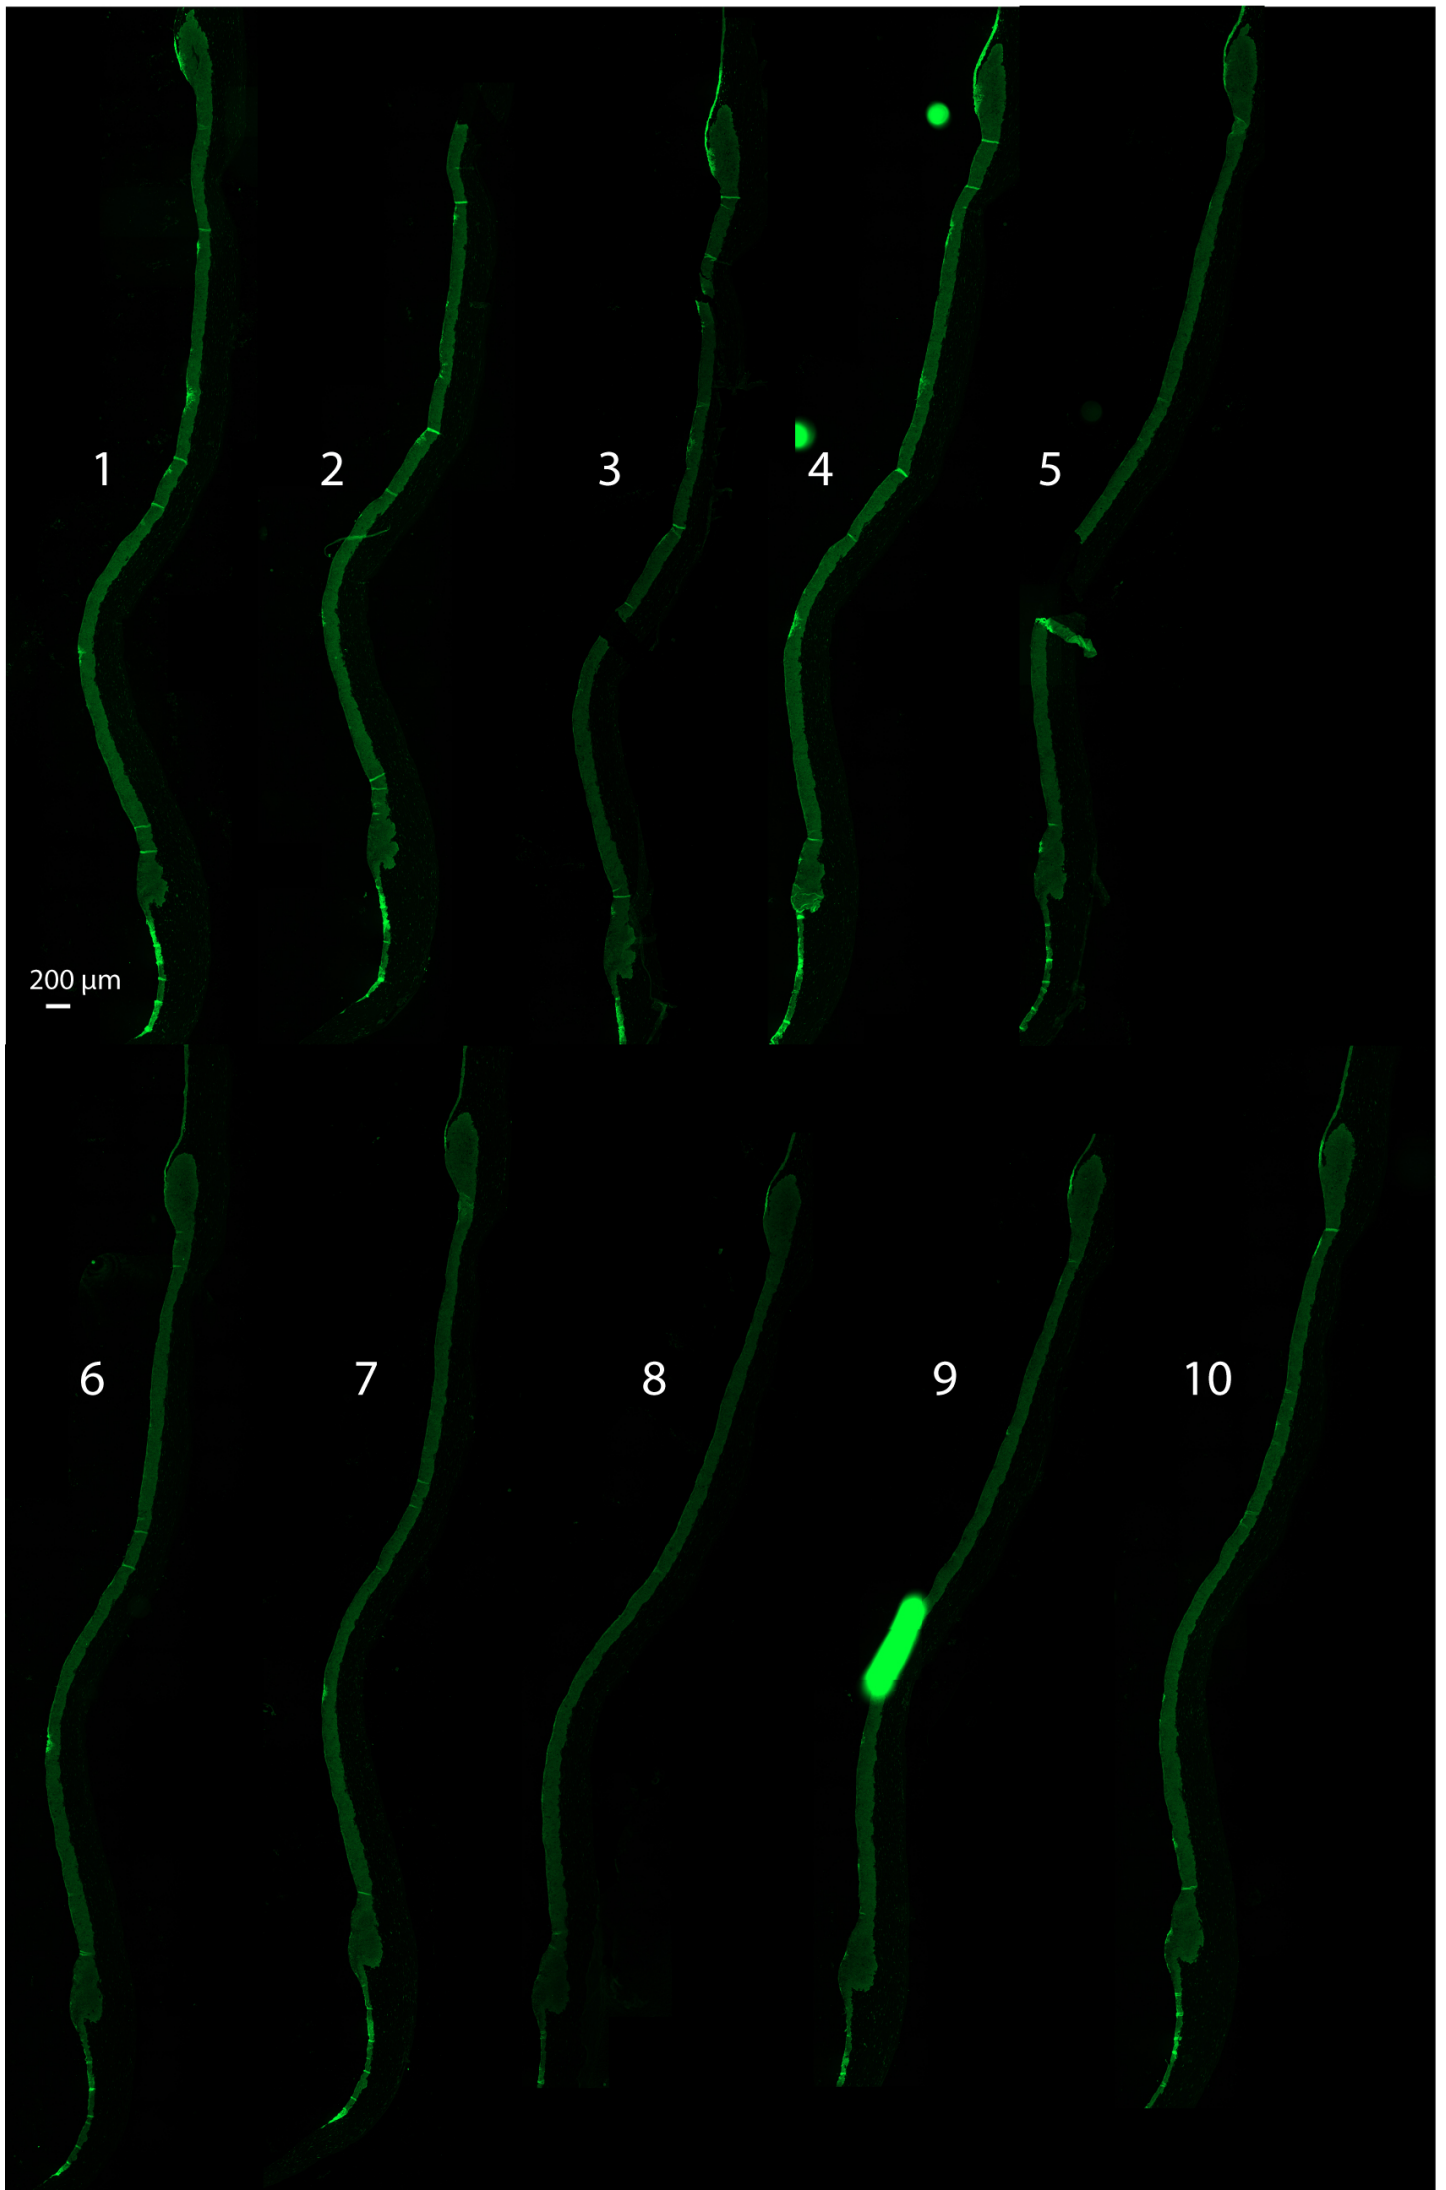



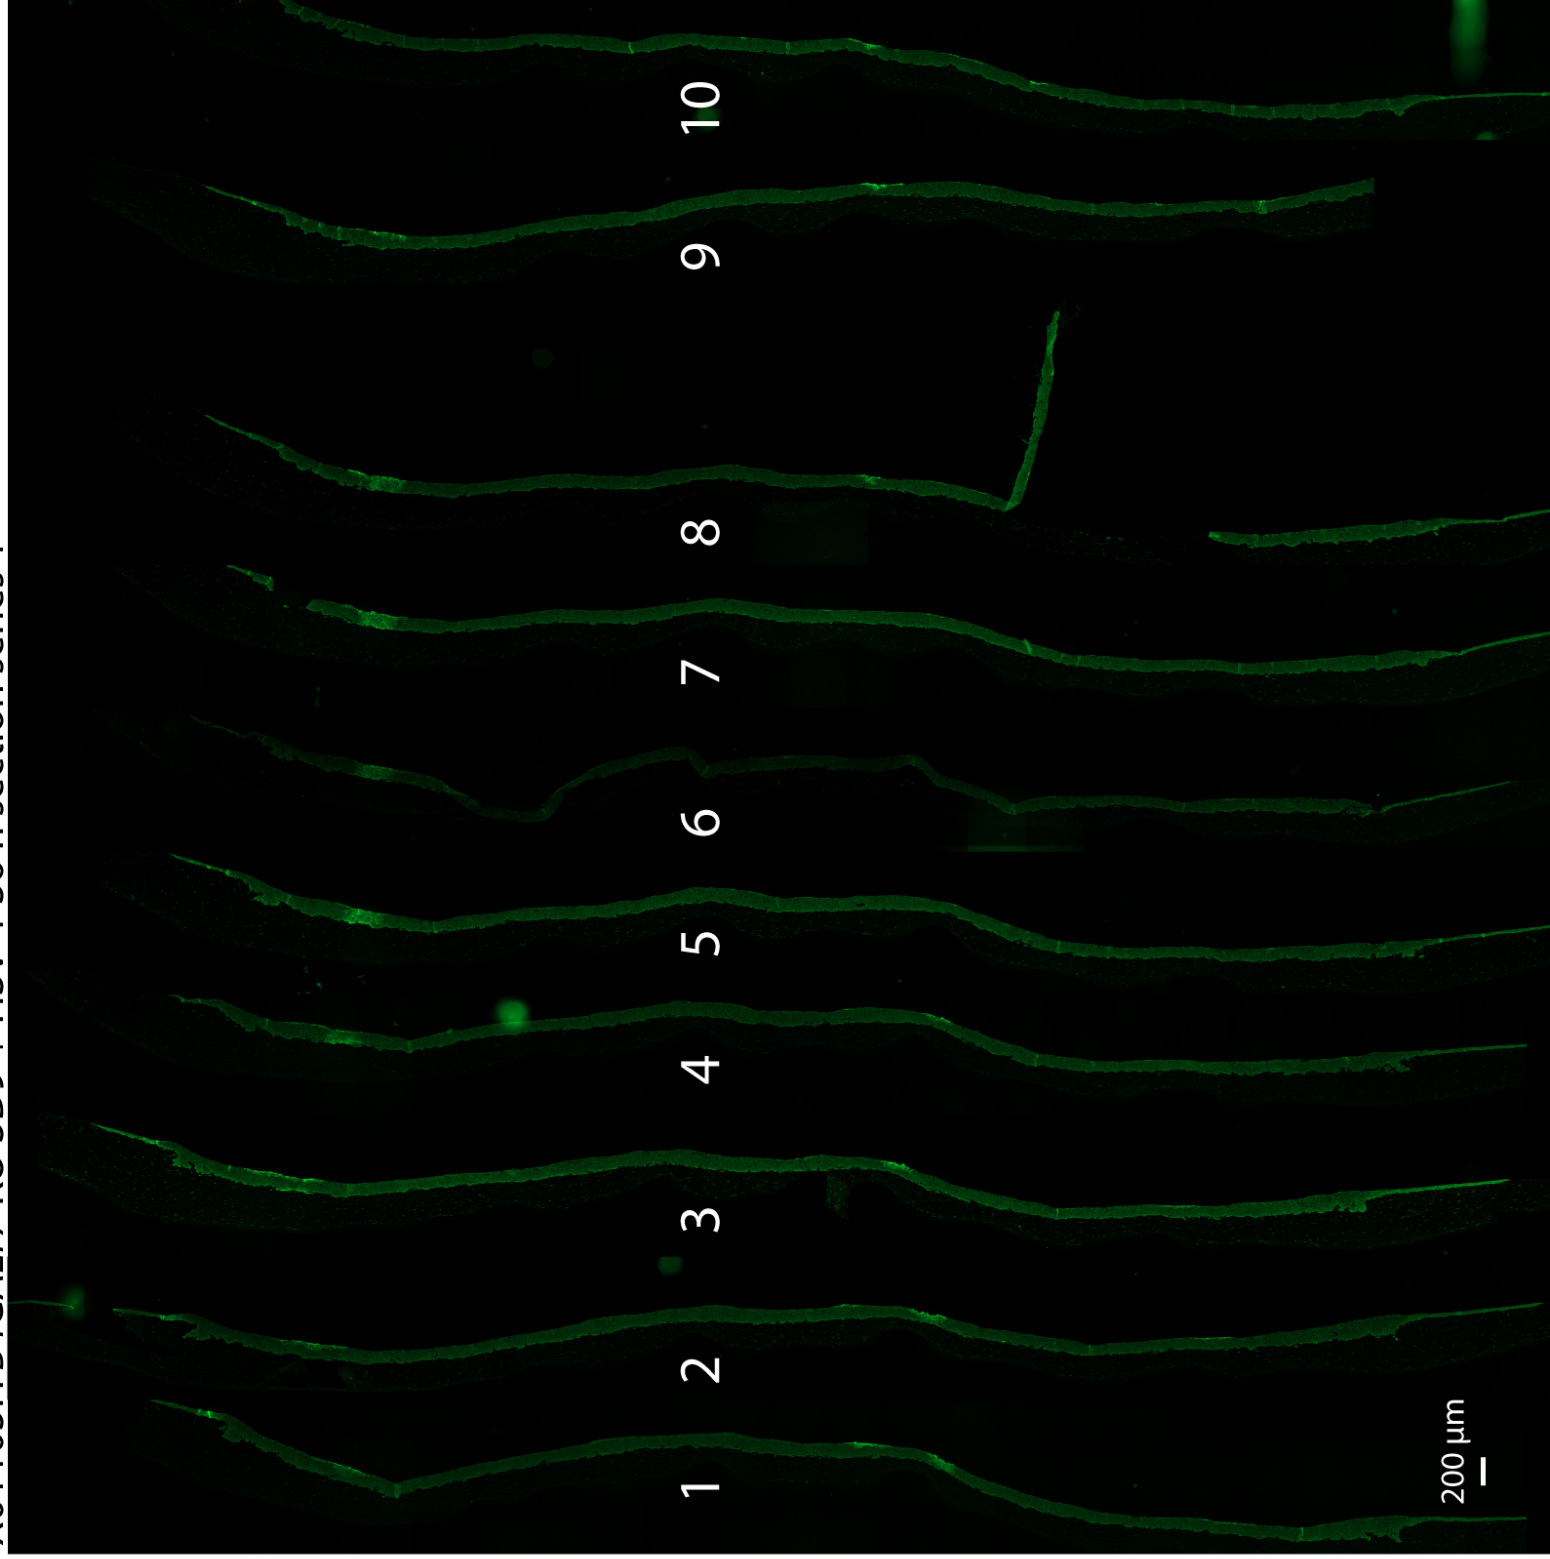

1

2

3

4

5

6

7

8

9

10

200 μm

X01105H B4GALT7 KO 3D9 + HSV-1 36 h section series 2

1 2 3 4 5 6 7 8 9 10

200  $\mu$ m

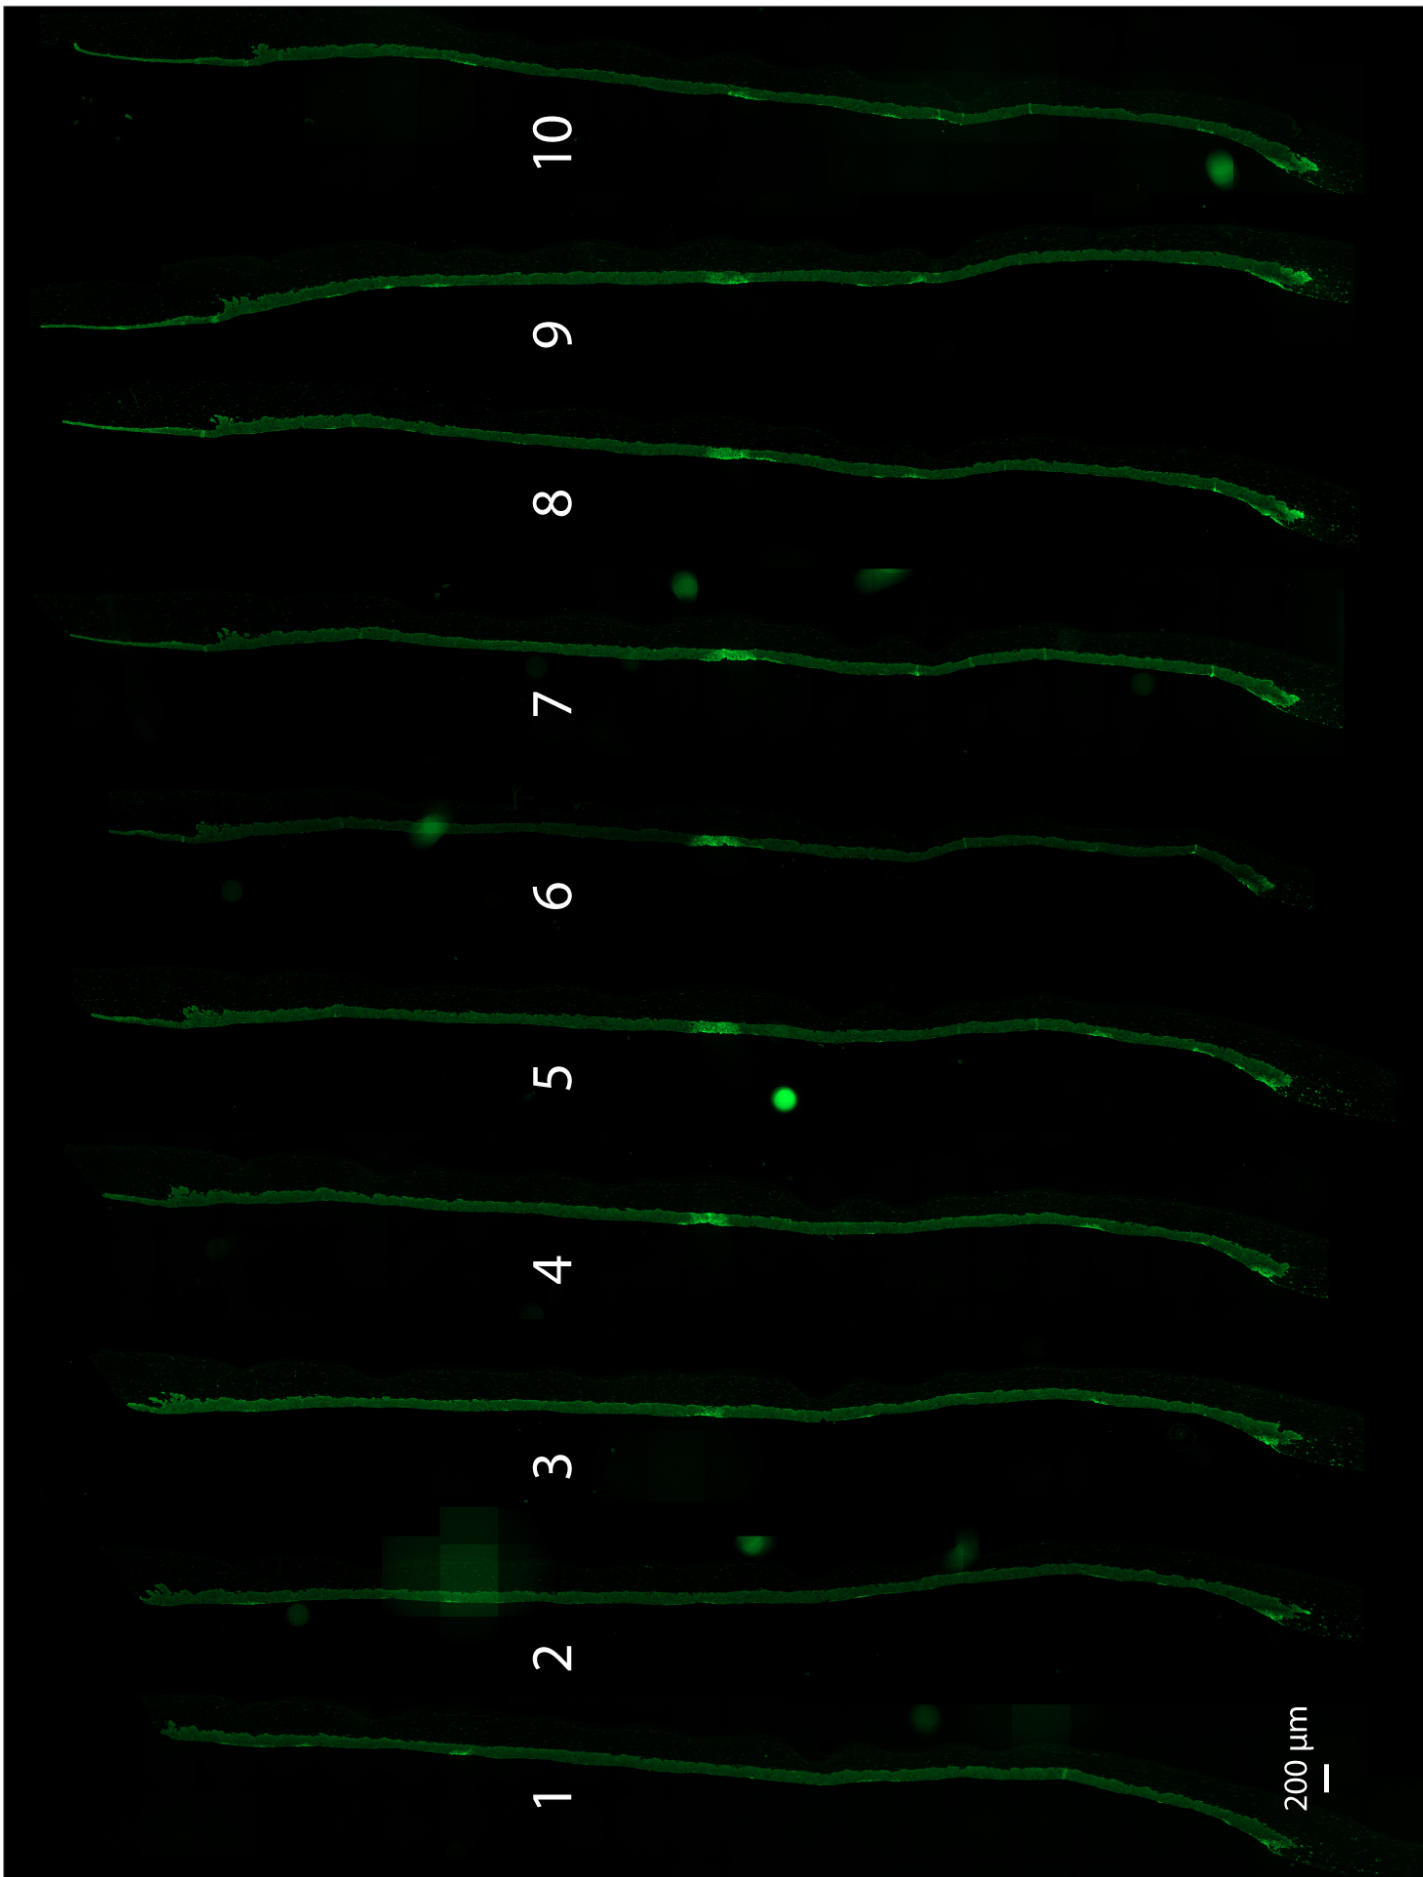

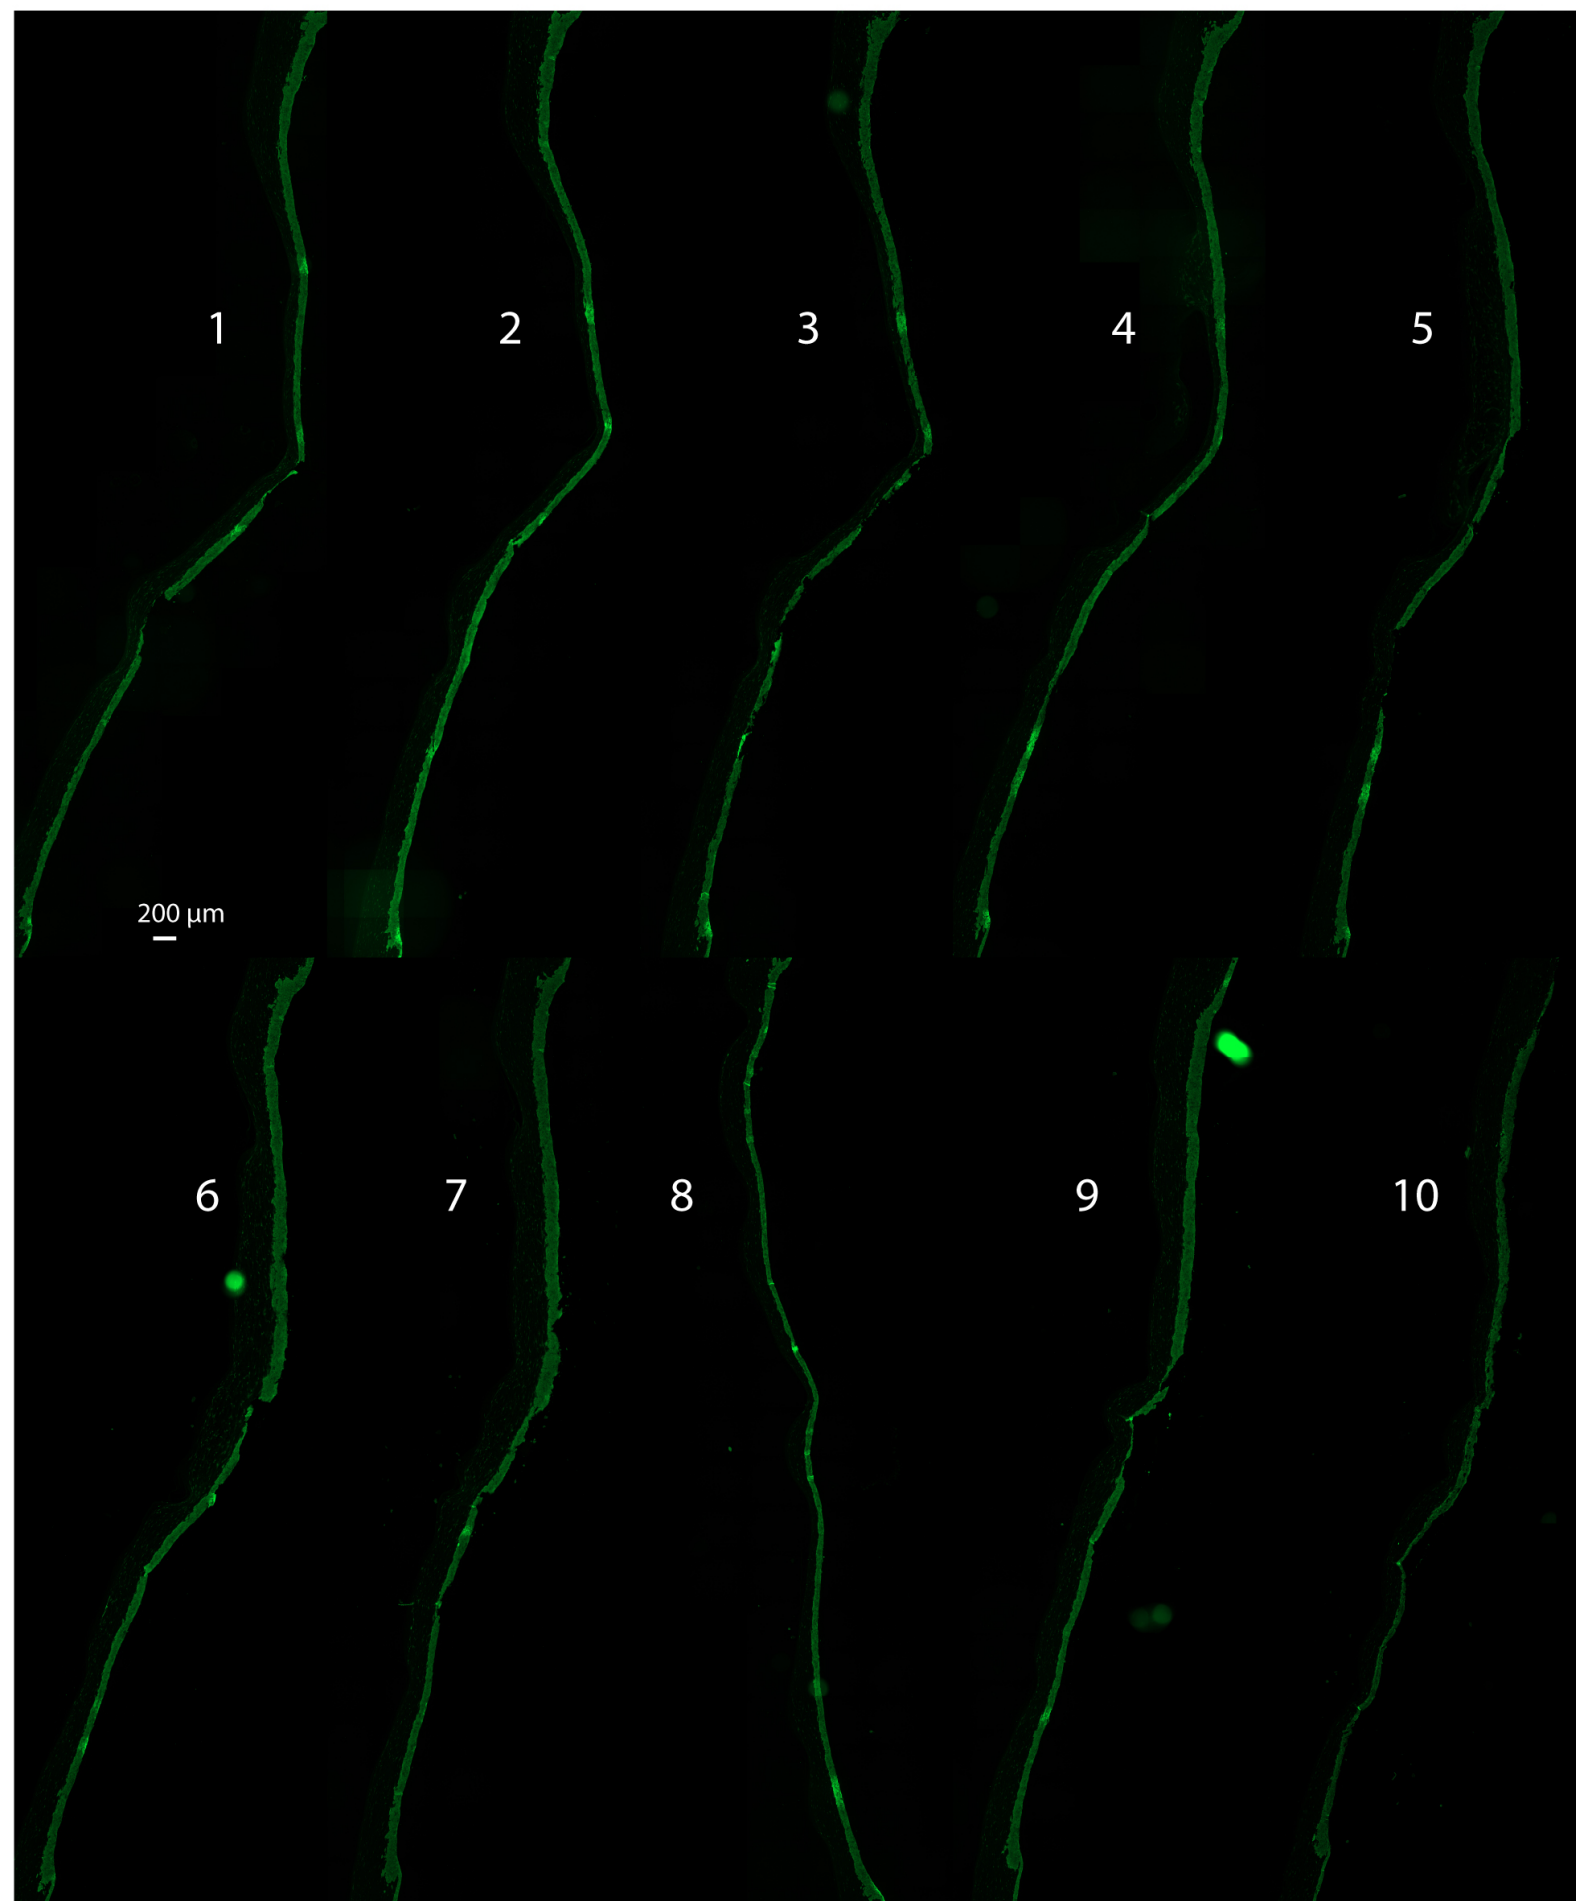

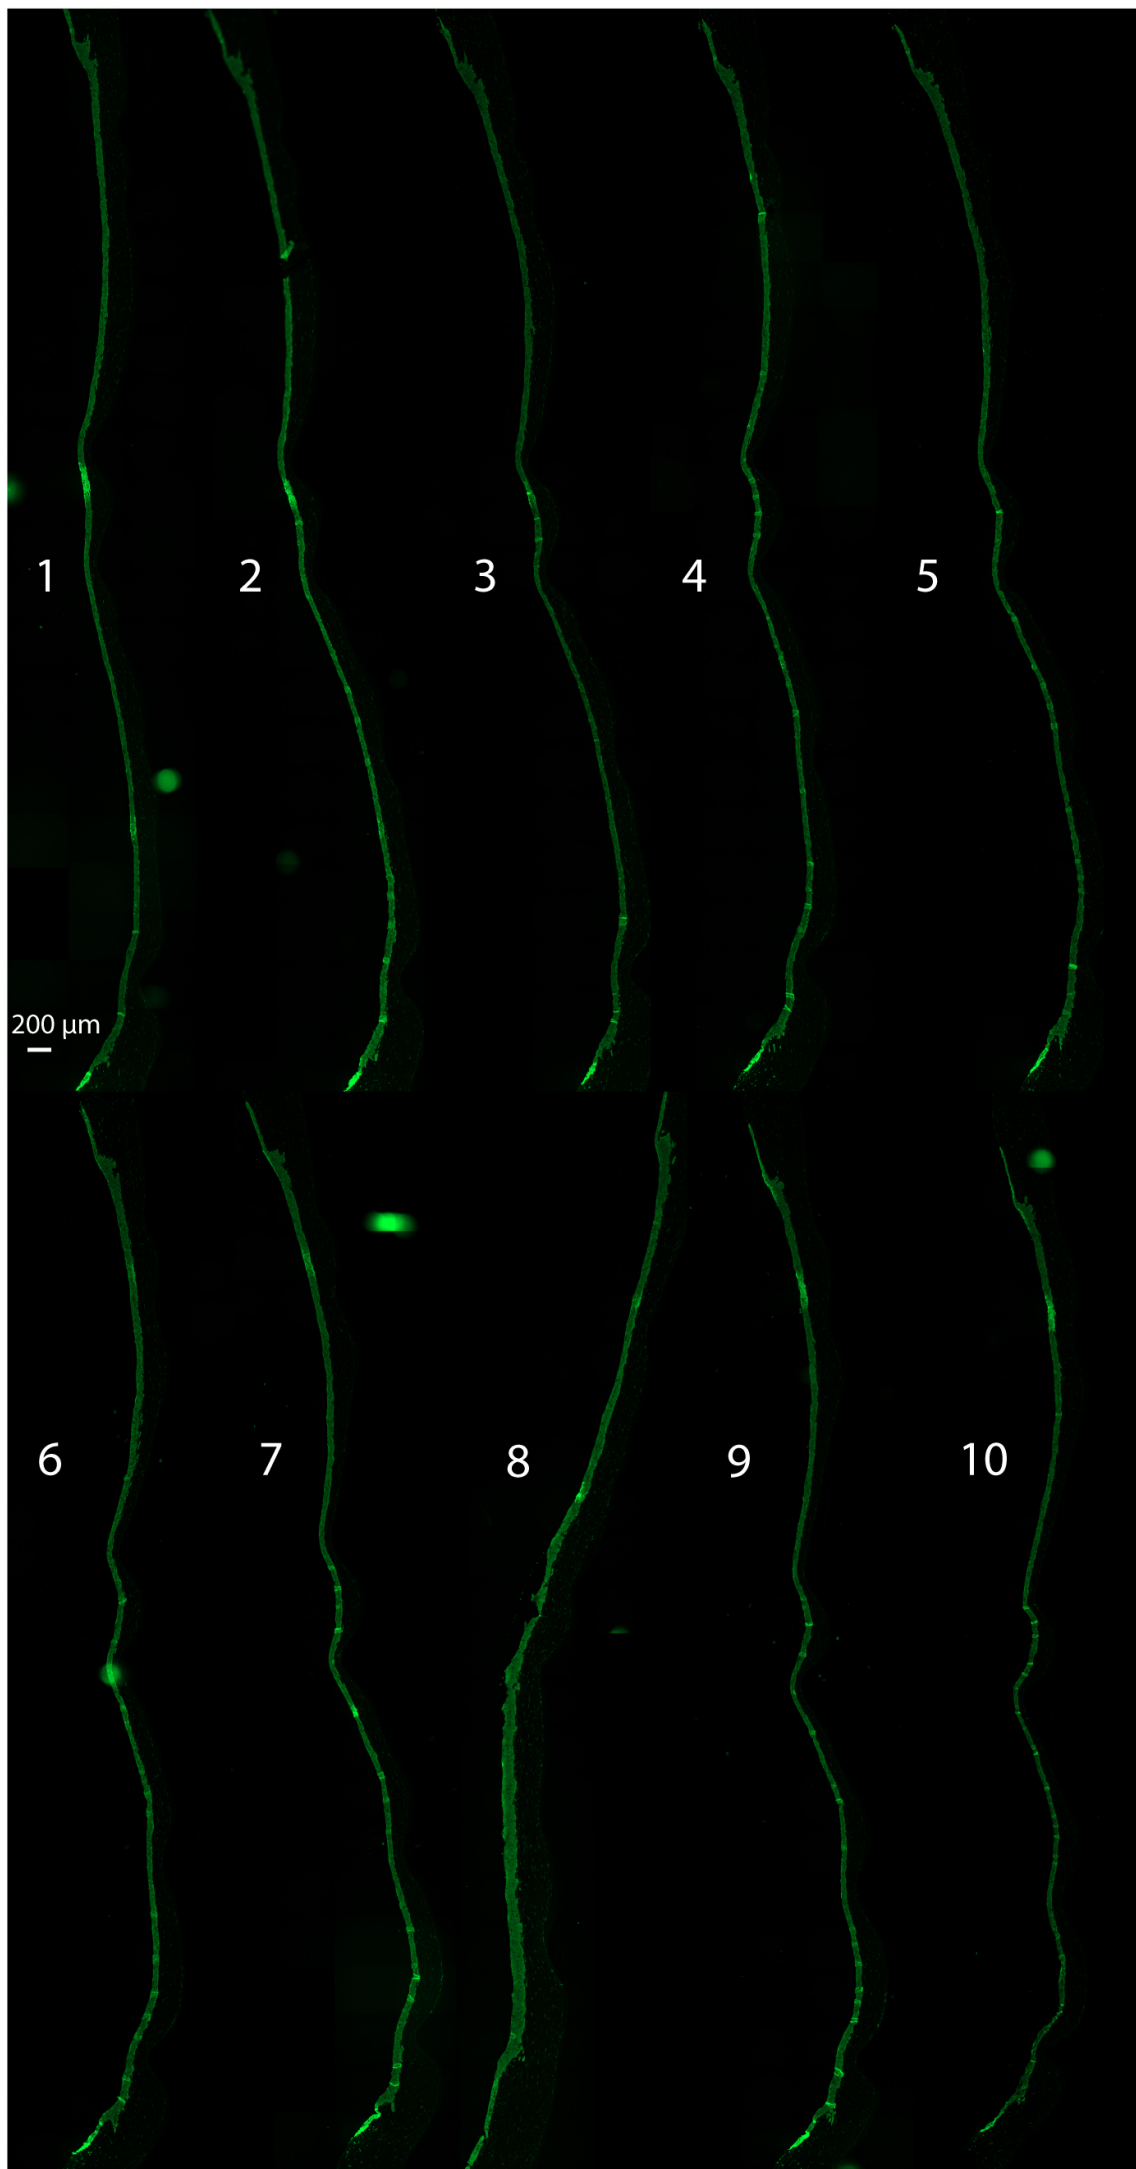



X01105P *ST3GAL5* KO 1C5 + HSV-1 36 h section series 1

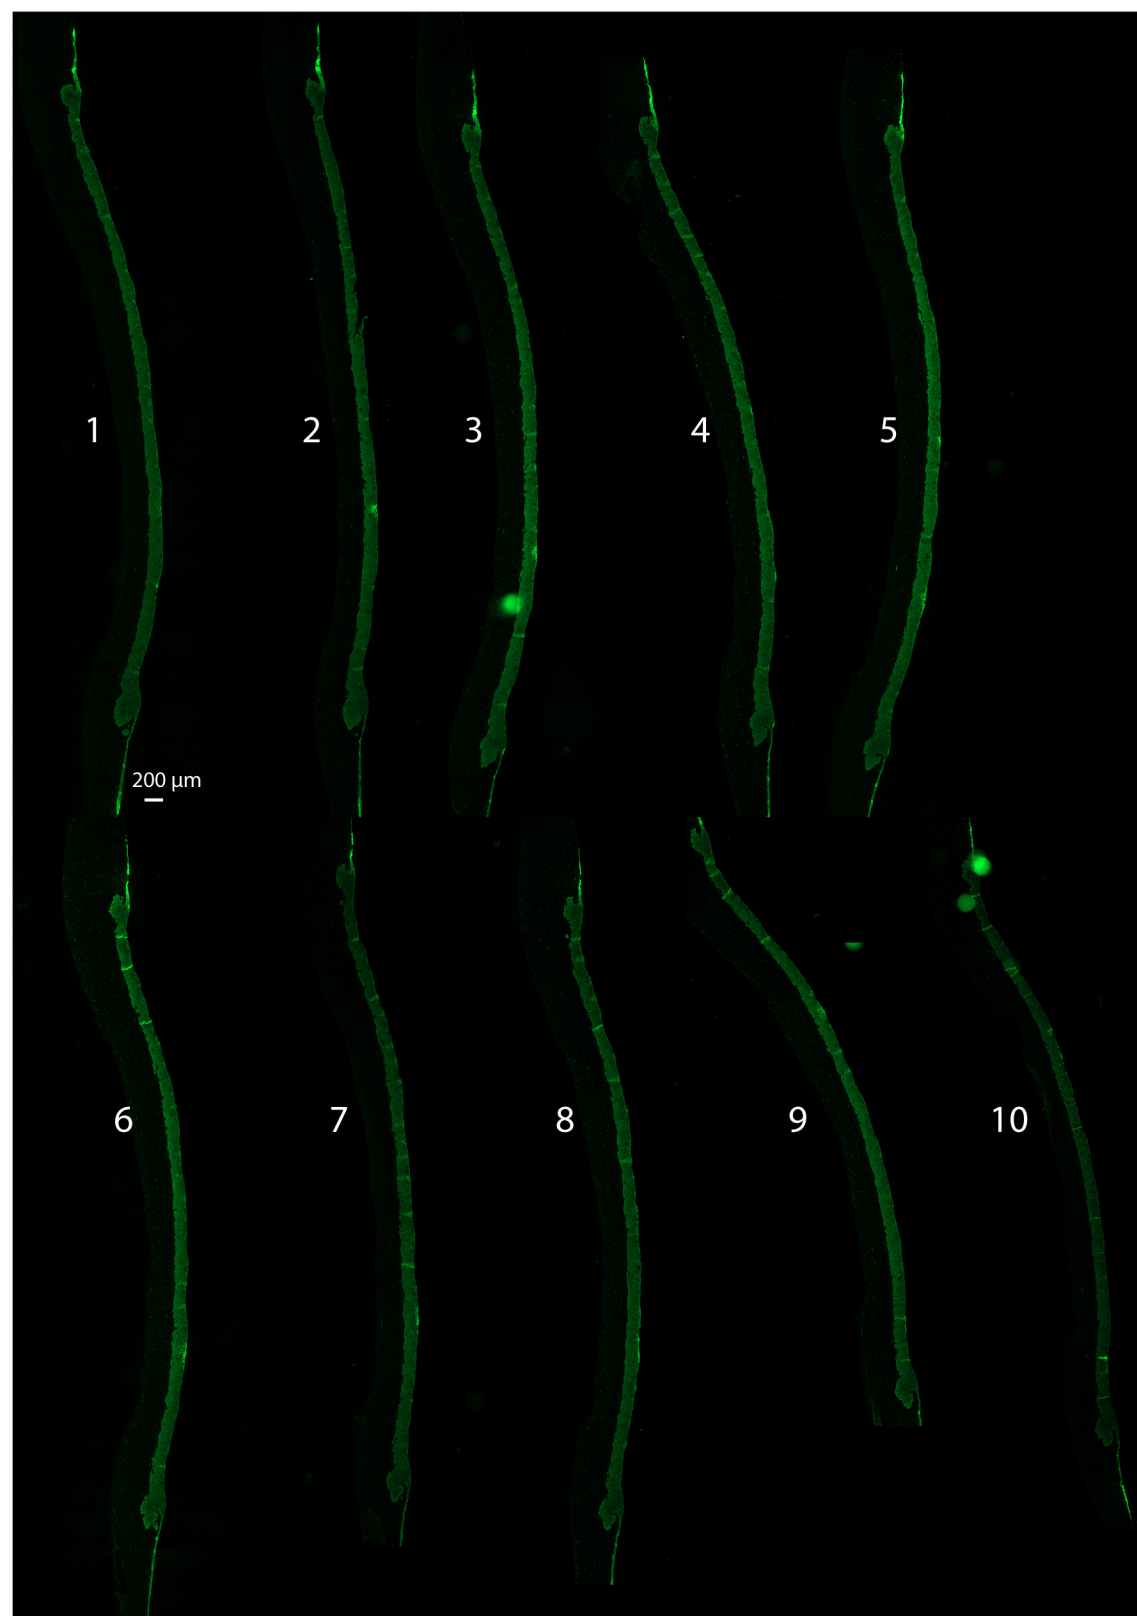

X01105P *ST3GAL5* KO 1C5 + HSV-1 36 h section series 2

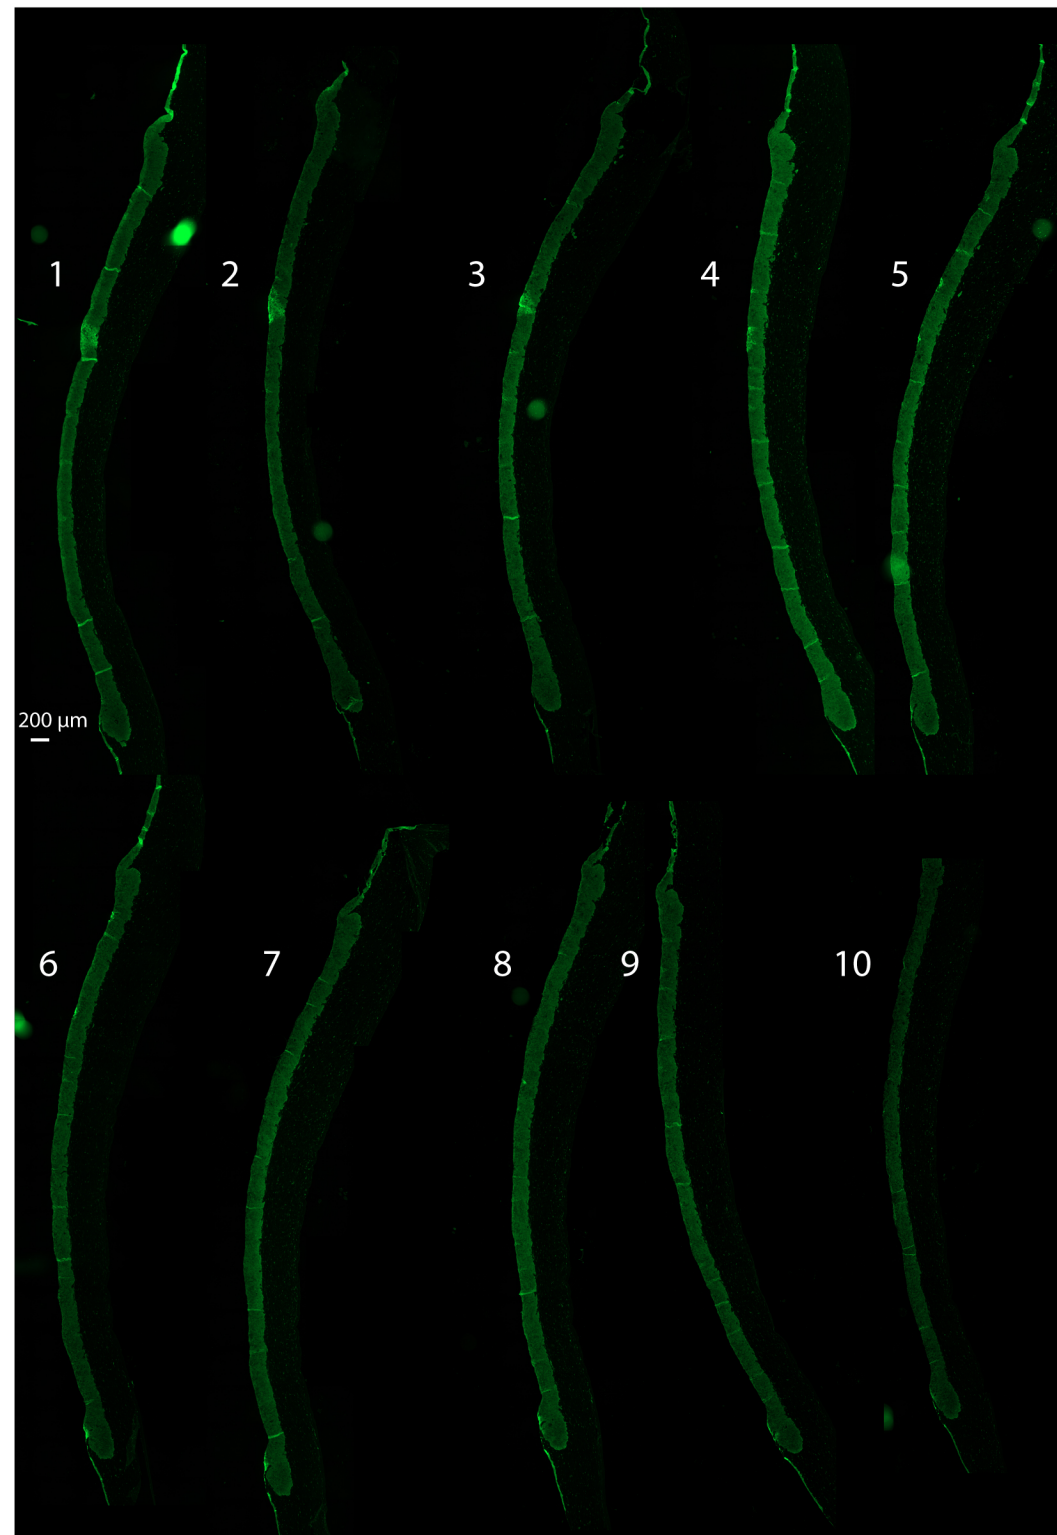

Supplement: 41467_2023_42669_MOESM1_ESM.pdf [file 41467_2023_42669_MOESM1_ESM.pdf]
